# Supplementary material for: First report of begomoviruses infecting Cucumis sativus L. in North America and identification of a proposed new begomovirus species
Source: PeerJ. 2020 Jul 10;8:e9245. doi: 10.7717/peerj.9245 (PMC7357562; doi:10.7717/peerj.9245)
Supplement: Supplemental Information 10 [file peerj-08-9245-s010.xlsx]

## Sheet: Cucumber vs nt
query	subject	pident	score	evalue	taxid	scientific_name	common_name	Kingdom
Contig9080	Aureimonas sp. strain Au_C2_9 16S ribosomal RNA gene, partial sequence	99.703	1234	0	1872658	Aureimonas sp.	Aureimonas sp.	Bacteria
Contig938	Aureimonas ureilytica plasmid pAUTrrn DNA, ribosomal RNA operon, complete genome	99.532	2726	0	1121028	Aureimonas ureilytica DSM 18598 = NBRC 106430	Aureimonas ureilytica DSM 18598 = NBRC 106430	Bacteria
Contig1140	Aureimonas ureilytica plasmid pAUTrrn DNA, ribosomal RNA operon, complete genome	99.872	2870	0	1121028	Aureimonas ureilytica DSM 18598 = NBRC 106430	Aureimonas ureilytica DSM 18598 = NBRC 106430	Bacteria
Contig4727	Aureimonas ureilytica plasmid pAUTrrn DNA, ribosomal RNA operon, complete genome	100	1613	0	1121028	Aureimonas ureilytica DSM 18598 = NBRC 106430	Aureimonas ureilytica DSM 18598 = NBRC 106430	Bacteria
Contig10590	Aureimonas ureilytica plasmid pAUTrrn DNA, ribosomal RNA operon, complete genome	97.297	1068	0	1121028	Aureimonas ureilytica DSM 18598 = NBRC 106430	Aureimonas ureilytica DSM 18598 = NBRC 106430	Bacteria
Contig15878	Aureimonas ureilytica plasmid pAUTrrn DNA, ribosomal RNA operon, complete genome	98.289	920	0	1121028	Aureimonas ureilytica DSM 18598 = NBRC 106430	Aureimonas ureilytica DSM 18598 = NBRC 106430	Bacteria
Contig2949	Aeschyntelus notatus mitochondrion, complete genome	75.134	235	2.14e-57	498933	Aeschyntelus notatus	Aeschyntelus notatus	Eukaryota
Contig1982	Brassica rapa genome, scaffold: A10	97.826	158	5.59e-34	3711	Brassica rapa	field mustard	Eukaryota
Contig7588	Bryonia dioica clone RLC_XXX retrotransposon copia-like gag/pol protein gene, partial cds	82.368	335	1.39e-87	3652	Bryonia dioica	red bryony	Eukaryota
Contig710	Citrullus lanatus BAC clone 51-H15, complete sequence	86.404	1232	0	3654	Citrullus lanatus	Citrullus lanatus	Eukaryota
Contig3103	Citrullus lanatus BAC clone 51-H15, complete sequence	86.496	300	7.32e-77	3654	Citrullus lanatus	Citrullus lanatus	Eukaryota
Contig5298	Citrullus lanatus BAC clone 51-H15, complete sequence	80.184	616	5.17e-172	3654	Citrullus lanatus	Citrullus lanatus	Eukaryota
Contig16860	Citrullus lanatus BAC clone 51-H15, complete sequence	84.026	436	2.56e-118	3654	Citrullus lanatus	Citrullus lanatus	Eukaryota
Contig1	Cucumis melo genomic chromosome, chr_8	91.885	1578	0	3656	Cucumis melo	muskmelon	Eukaryota
Contig3	Cucumis melo genomic chromosome, chr_8	83.586	2001	0	3656	Cucumis melo	muskmelon	Eukaryota
Contig4	Cucumis melo genomic chromosome, chr_7	92.431	3694	0	3656	Cucumis melo	muskmelon	Eukaryota
Contig6	Cucumis melo genomic chromosome, chr_8	85.449	1027	0	3656	Cucumis melo	muskmelon	Eukaryota
Contig7	Cucumis melo genomic chromosome, chr_1	77.834	1155	0	3656	Cucumis melo	muskmelon	Eukaryota
Contig8	Cucumis melo genomic chromosome, chr_6	87.703	7603	0	3656	Cucumis melo	muskmelon	Eukaryota
Contig9	Cucumis melo genomic chromosome, chr_4	81.647	2687	0	3656	Cucumis melo	muskmelon	Eukaryota
Contig12	Cucumis melo genomic chromosome, chr_10	85.532	3552	0	3656	Cucumis melo	muskmelon	Eukaryota
Contig13	Cucumis melo genomic chromosome, chr_8	77.748	435	8.63e-117	3656	Cucumis melo	muskmelon	Eukaryota
Contig14	Cucumis melo genomic chromosome, chr_3	83.973	2878	0	3656	Cucumis melo	muskmelon	Eukaryota
Contig15	Cucumis melo genomic chromosome, chr_9	85.238	1013	0	3656	Cucumis melo	muskmelon	Eukaryota
Contig17	Cucumis melo genomic chromosome, chr_6	89.399	5297	0	3656	Cucumis melo	muskmelon	Eukaryota
Contig18	Cucumis melo genomic chromosome, chr_1	87.012	1260	0	3656	Cucumis melo	muskmelon	Eukaryota
Contig19	Cucumis melo genomic chromosome, chr_2	84.015	1206	0	3656	Cucumis melo	muskmelon	Eukaryota
Contig21	Cucumis melo genomic chromosome, chr_7	84.33	315	8.88e-81	3656	Cucumis melo	muskmelon	Eukaryota
Contig22	Cucumis melo genomic chromosome, chr_8	83.922	2230	0	3656	Cucumis melo	muskmelon	Eukaryota
Contig24	Cucumis melo genomic chromosome, chr_6	77.944	736	0	3656	Cucumis melo	muskmelon	Eukaryota
Contig25	Cucumis melo genomic chromosome, chr_10	83.398	457	1.06e-123	3656	Cucumis melo	muskmelon	Eukaryota
Contig28	Cucumis melo genomic chromosome, chr_2	72.856	327	7.9e-85	3656	Cucumis melo	muskmelon	Eukaryota
Contig30	Cucumis melo genomic chromosome, chr_5	89.313	163	2.12e-35	3656	Cucumis melo	muskmelon	Eukaryota
Contig31	Cucumis melo genomic chromosome, chr_11	85.681	880	0	3656	Cucumis melo	muskmelon	Eukaryota
Contig32	Cucumis melo genomic chromosome, chr_8	85.512	292	2.56e-74	3656	Cucumis melo	muskmelon	Eukaryota
Contig33	Cucumis melo genomic chromosome, chr_1	85.912	758	0	3656	Cucumis melo	muskmelon	Eukaryota
Contig35	PREDICTED: Cucumis melo uncharacterized LOC103490955 (LOC103490955), transcript variant X8, mRNA	93.564	300	1.34e-76	3656	Cucumis melo	muskmelon	Eukaryota
Contig36	Cucumis melo genomic chromosome, chr_1	89.3	1531	0	3656	Cucumis melo	muskmelon	Eukaryota
Contig37	Cucumis melo genomic chromosome, chr_4	89.274	394	5.87e-105	3656	Cucumis melo	muskmelon	Eukaryota
Contig38	Cucumis melo genomic chromosome, chr_9	84.517	1168	0	3656	Cucumis melo	muskmelon	Eukaryota
Contig40	Cucumis melo genomic chromosome, chr_7	78.702	534	3.19e-147	3656	Cucumis melo	muskmelon	Eukaryota
Contig42	Cucumis melo genomic chromosome, chr_1	82.822	281	4.47e-71	3656	Cucumis melo	muskmelon	Eukaryota
Contig43	Cucumis melo genomic chromosome, chr_9	88.721	1367	0	3656	Cucumis melo	muskmelon	Eukaryota
Contig44	Cucumis melo genomic chromosome, chr_6	85.127	691	0	3656	Cucumis melo	muskmelon	Eukaryota
Contig46	Cucumis melo genomic chromosome, chr_2	88.964	532	1.04e-146	3656	Cucumis melo	muskmelon	Eukaryota
Contig47	Cucumis melo genomic chromosome, chr_8	86.469	331	3.86e-86	3656	Cucumis melo	muskmelon	Eukaryota
Contig49	Cucumis melo genomic chromosome, chr_9	77.896	444	4.63e-120	3656	Cucumis melo	muskmelon	Eukaryota
Contig50	Cucumis melo genomic chromosome, chr_1	82.085	719	0	3656	Cucumis melo	muskmelon	Eukaryota
Contig51	Cucumis melo genomic chromosome, chr_11	89.633	780	0	3656	Cucumis melo	muskmelon	Eukaryota
Contig52	Cucumis melo genomic chromosome, chr_5	88.015	3184	0	3656	Cucumis melo	muskmelon	Eukaryota
Contig53	Cucumis melo genomic chromosome, chr_10	85.158	414	3.37e-111	3656	Cucumis melo	muskmelon	Eukaryota
Contig54	Cucumis melo genomic chromosome, chr_10	87.821	351	3.06e-92	3656	Cucumis melo	muskmelon	Eukaryota
Contig55	Cucumis melo genomic chromosome, chr_6	77.583	1805	0	3656	Cucumis melo	muskmelon	Eukaryota
Contig58	Cucumis melo genomic chromosome, chr_10	78.391	460	3.98e-125	3656	Cucumis melo	muskmelon	Eukaryota
Contig59	Cucumis melo genomic chromosome, chr_4	88.748	5326	0	3656	Cucumis melo	muskmelon	Eukaryota
Contig60	Cucumis melo genomic chromosome, chr_4	82.803	254	6.88e-63	3656	Cucumis melo	muskmelon	Eukaryota
Contig63	Cucumis melo genomic chromosome, chr_1	86.239	117	9.15e-22	3656	Cucumis melo	muskmelon	Eukaryota
Contig65	Cucumis melo genomic chromosome, chr_11	86.928	496	9.75e-136	3656	Cucumis melo	muskmelon	Eukaryota
Contig66	Cucumis melo genomic chromosome, chr_3	76.461	311	3.72e-80	3656	Cucumis melo	muskmelon	Eukaryota
Contig67	Cucumis melo genomic chromosome, chr_12	85.773	505	1.73e-138	3656	Cucumis melo	muskmelon	Eukaryota
Contig70	Cucumis melo genomic chromosome, chr_1	78.016	281	3.28e-71	3656	Cucumis melo	muskmelon	Eukaryota
Contig71	Cucumis melo genomic chromosome, chr_8	85.841	924	0	3656	Cucumis melo	muskmelon	Eukaryota
Contig72	Cucumis melo genomic chromosome, chr_4	83.234	704	0	3656	Cucumis melo	muskmelon	Eukaryota
Contig74	Cucumis melo genomic chromosome, chr_7	86.777	132	3.13e-26	3656	Cucumis melo	muskmelon	Eukaryota
Contig78	Cucumis melo genomic chromosome, chr_10	88.265	231	3.1e-56	3656	Cucumis melo	muskmelon	Eukaryota
Contig79	Cucumis melo genomic chromosome, chr_8	93.75	808	0	3656	Cucumis melo	muskmelon	Eukaryota
Contig80	Cucumis melo genomic chromosome, chr_1	88.843	292	1.16e-74	3656	Cucumis melo	muskmelon	Eukaryota
Contig83	Cucumis melo genomic chromosome, chr_1	86.916	117	7.16e-22	3656	Cucumis melo	muskmelon	Eukaryota
Contig84	Cucumis melo genomic scaffold, unassembled_sequence38562	80.201	278	3.94e-70	3656	Cucumis melo	muskmelon	Eukaryota
Contig85	Cucumis melo genomic chromosome, chr_2	82.428	267	8.2e-67	3656	Cucumis melo	muskmelon	Eukaryota
Contig86	Cucumis melo genomic chromosome, chr_11	89.241	392	1.01e-104	3656	Cucumis melo	muskmelon	Eukaryota
Contig88	Cucumis melo genomic chromosome, chr_5	85.012	396	7.49e-106	3656	Cucumis melo	muskmelon	Eukaryota
Contig89	Cucumis melo genomic chromosome, chr_2	92.806	604	2.14e-168	3656	Cucumis melo	muskmelon	Eukaryota
Contig90	Cucumis melo genomic chromosome, chr_9	89.218	449	5.51e-122	3656	Cucumis melo	muskmelon	Eukaryota
Contig91	Cucumis melo genomic chromosome, chr_6	87.082	501	1.67e-137	3656	Cucumis melo	muskmelon	Eukaryota
Contig92	Cucumis melo genomic chromosome, chr_1	87.262	1659	0	3656	Cucumis melo	muskmelon	Eukaryota
Contig93	Cucumis melo genomic chromosome, chr_6	83.423	492	8.72e-135	3656	Cucumis melo	muskmelon	Eukaryota
Contig94	Cucumis melo genomic chromosome, chr_7	77.941	296	9.08e-76	3656	Cucumis melo	muskmelon	Eukaryota
Contig95	Cucumis melo genomic chromosome, chr_4	84.818	577	2.31e-160	3656	Cucumis melo	muskmelon	Eukaryota
Contig97	Cucumis melo genomic chromosome, chr_6	87.273	311	2.72e-80	3656	Cucumis melo	muskmelon	Eukaryota
Contig98	Cucumis melo genomic chromosome, chr_3	85.484	569	3.43e-158	3656	Cucumis melo	muskmelon	Eukaryota
Contig99	Cucumis melo genomic chromosome, chr_9	87.179	172	1.25e-38	3656	Cucumis melo	muskmelon	Eukaryota
Contig100	Cucumis melo genomic chromosome, chr_1	79.124	243	1.02e-59	3656	Cucumis melo	muskmelon	Eukaryota
Contig103	Cucumis melo genomic chromosome, chr_1	88.688	521	1.68e-143	3656	Cucumis melo	muskmelon	Eukaryota
Contig104	Cucumis melo genomic chromosome, chr_1	88.889	396	7.5e-106	3656	Cucumis melo	muskmelon	Eukaryota
Contig105	Cucumis melo genomic chromosome, chr_12	94.344	673	0	3656	Cucumis melo	muskmelon	Eukaryota
Contig106	Cucumis melo genomic chromosome, chr_2	82.628	946	0	3656	Cucumis melo	muskmelon	Eukaryota
Contig107	Cucumis melo genomic chromosome, chr_8	84.509	558	2.55e-154	3656	Cucumis melo	muskmelon	Eukaryota
Contig109	Cucumis melo genomic chromosome, chr_6	84.524	239	1.08e-58	3656	Cucumis melo	muskmelon	Eukaryota
Contig111	Cucumis melo genomic chromosome, chr_1	88.71	896	0	3656	Cucumis melo	muskmelon	Eukaryota
Contig112	PREDICTED: Cucumis melo pentatricopeptide repeat-containing protein At4g01570 (LOC103498827), mRNA	90.909	161	2.64e-35	3656	Cucumis melo	muskmelon	Eukaryota
Contig114	Cucumis melo genomic chromosome, chr_9	87.701	215	3.16e-51	3656	Cucumis melo	muskmelon	Eukaryota
Contig116	Cucumis melo genomic chromosome, chr_6	79.07	141	4.79e-29	3656	Cucumis melo	muskmelon	Eukaryota
Contig119	Cucumis melo genomic chromosome, chr_6	79.879	339	3.13e-88	3656	Cucumis melo	muskmelon	Eukaryota
Contig122	Cucumis melo genomic chromosome, chr_4	95.2	196	5.74e-46	3656	Cucumis melo	muskmelon	Eukaryota
Contig123	Cucumis melo genomic chromosome, chr_7	85.777	946	0	3656	Cucumis melo	muskmelon	Eukaryota
Contig124	Cucumis melo genomic chromosome, chr_8	79.846	348	1.42e-91	3656	Cucumis melo	muskmelon	Eukaryota
Contig126	Cucumis melo genomic chromosome, chr_6	86.688	331	3.35e-86	3656	Cucumis melo	muskmelon	Eukaryota
Contig127	Cucumis melo genomic chromosome, chr_1	88.676	627	2.59e-175	3656	Cucumis melo	muskmelon	Eukaryota
Contig131	Cucumis melo genomic chromosome, chr_11	79.973	514	5.27e-141	3656	Cucumis melo	muskmelon	Eukaryota
Contig133	Cucumis melo genomic chromosome, chr_8	91.899	549	3.23e-152	3656	Cucumis melo	muskmelon	Eukaryota
Contig134	Cucumis melo genomic chromosome, chr_7	83.801	281	2.57e-71	3656	Cucumis melo	muskmelon	Eukaryota
Contig135	Cucumis melo genomic chromosome, chr_11	86.555	126	1.08e-24	3656	Cucumis melo	muskmelon	Eukaryota
Contig136	Cucumis melo genomic chromosome, chr_10	89.111	1472	0	3656	Cucumis melo	muskmelon	Eukaryota
Contig137	Cucumis melo genomic chromosome, chr_2	84.906	158	3.14e-34	3656	Cucumis melo	muskmelon	Eukaryota
Contig138	Cucumis melo genomic chromosome, chr_5	84.158	483	4.22e-132	3656	Cucumis melo	muskmelon	Eukaryota
Contig139	Cucumis melo genomic chromosome, chr_1	88.66	235	1.5e-57	3656	Cucumis melo	muskmelon	Eukaryota
Contig141	Cucumis melo genomic chromosome, chr_9	90.856	688	0	3656	Cucumis melo	muskmelon	Eukaryota
Contig142	Cucumis melo genomic scaffold, unanchored_scaffold00600	85.659	520	5.85e-143	3656	Cucumis melo	muskmelon	Eukaryota
Contig144	Cucumis melo genomic chromosome, chr_8	81.136	377	2.25e-100	3656	Cucumis melo	muskmelon	Eukaryota
Contig145	Cucumis melo genomic chromosome, chr_8	86.364	390	3.58e-104	3656	Cucumis melo	muskmelon	Eukaryota
Contig147	Cucumis melo genomic chromosome, chr_12	90	139	2.02e-28	3656	Cucumis melo	muskmelon	Eukaryota
Contig148	Cucumis melo genomic chromosome, chr_6	81.343	398	1.55e-106	3656	Cucumis melo	muskmelon	Eukaryota
Contig149	Cucumis melo genomic chromosome, chr_1	86.772	616	3.37e-172	3656	Cucumis melo	muskmelon	Eukaryota
Contig150	Cucumis melo genomic chromosome, chr_6	85.121	291	3.28e-74	3656	Cucumis melo	muskmelon	Eukaryota
Contig152	Cucumis melo genomic chromosome, chr_6	85.167	207	2.96e-49	3656	Cucumis melo	muskmelon	Eukaryota
Contig153	Cucumis melo genomic chromosome, chr_2	100	139	3.46e-28	3656	Cucumis melo	muskmelon	Eukaryota
Contig155	Cucumis melo genomic chromosome, chr_5	85.666	289	8.5e-74	3656	Cucumis melo	muskmelon	Eukaryota
Contig156	Cucumis melo genomic chromosome, chr_1	89.683	475	8.62e-130	3656	Cucumis melo	muskmelon	Eukaryota
Contig158	Cucumis melo genomic chromosome, chr_1	86.154	276	1.5e-69	3656	Cucumis melo	muskmelon	Eukaryota
Contig159	Cucumis melo genomic chromosome, chr_3	88.652	329	5.66e-86	3656	Cucumis melo	muskmelon	Eukaryota
Contig160	Cucumis melo genomic chromosome, chr_7	74.951	359	1.32e-94	3656	Cucumis melo	muskmelon	Eukaryota
Contig162	Cucumis melo genomic chromosome, chr_9	92.636	723	0	3656	Cucumis melo	muskmelon	Eukaryota
Contig163	Cucumis melo genomic chromosome, chr_4	84.127	287	3.03e-73	3656	Cucumis melo	muskmelon	Eukaryota
Contig164	Cucumis melo genomic chromosome, chr_2	84.962	132	2.14e-26	3656	Cucumis melo	muskmelon	Eukaryota
Contig165	Cucumis melo genomic chromosome, chr_1	86.387	643	1.66e-180	3656	Cucumis melo	muskmelon	Eukaryota
Contig166	Cucumis melo genomic chromosome, chr_4	84.416	148	1.78e-31	3656	Cucumis melo	muskmelon	Eukaryota
Contig168	Cucumis melo genomic chromosome, chr_12	78.924	137	3.4e-28	3656	Cucumis melo	muskmelon	Eukaryota
Contig169	Cucumis melo genomic chromosome, chr_3	92.415	713	0	3656	Cucumis melo	muskmelon	Eukaryota
Contig170	Cucumis melo genomic chromosome, chr_9	84.698	268	2.66e-67	3656	Cucumis melo	muskmelon	Eukaryota
Contig171	Cucumis melo genomic chromosome, chr_4	81.395	241	2.11e-59	3656	Cucumis melo	muskmelon	Eukaryota
Contig172	Cucumis melo genomic chromosome, chr_7	84.932	632	3.78e-177	3656	Cucumis melo	muskmelon	Eukaryota
Contig174	Cucumis melo genomic chromosome, chr_2	86.435	340	5.5e-89	3656	Cucumis melo	muskmelon	Eukaryota
Contig175	Cucumis melo genomic chromosome, chr_8	85.848	776	0	3656	Cucumis melo	muskmelon	Eukaryota
Contig176	Cucumis melo genomic chromosome, chr_10	90.691	425	7.81e-115	3656	Cucumis melo	muskmelon	Eukaryota
Contig178	Cucumis melo genomic chromosome, chr_6	82.182	231	1.37e-56	3656	Cucumis melo	muskmelon	Eukaryota
Contig179	Cucumis melo genomic chromosome, chr_9	94.33	1179	0	3656	Cucumis melo	muskmelon	Eukaryota
Contig181	Cucumis melo genomic chromosome, chr_3	84.516	294	2.54e-75	3656	Cucumis melo	muskmelon	Eukaryota
Contig182	Cucumis melo genomic chromosome, chr_7	95.455	176	6.41e-40	3656	Cucumis melo	muskmelon	Eukaryota
Contig183	Cucumis melo genomic chromosome, chr_12	91.571	357	3.34e-94	3656	Cucumis melo	muskmelon	Eukaryota
Contig184	Cucumis melo genomic chromosome, chr_8	82.156	425	5.94e-115	3656	Cucumis melo	muskmelon	Eukaryota
Contig185	Cucumis melo genomic chromosome, chr_2	85.315	143	9.28e-30	3656	Cucumis melo	muskmelon	Eukaryota
Contig186	Cucumis melo genomic scaffold, unassembled_sequence34979	85.805	800	0	3656	Cucumis melo	muskmelon	Eukaryota
Contig187	Cucumis melo genomic chromosome, chr_9	80.769	152	1.07e-32	3656	Cucumis melo	muskmelon	Eukaryota
Contig188	Cucumis melo genomic chromosome, chr_9	93.173	366	4.17e-97	3656	Cucumis melo	muskmelon	Eukaryota
Contig189	Cucumis melo genomic chromosome, chr_6	92.754	300	3.54e-77	3656	Cucumis melo	muskmelon	Eukaryota
Contig190	Cucumis melo genomic chromosome, chr_2	86.908	388	2.48e-103	3656	Cucumis melo	muskmelon	Eukaryota
Contig191	Cucumis melo genomic chromosome, chr_11	84.474	361	2.11e-95	3656	Cucumis melo	muskmelon	Eukaryota
Contig192	Cucumis melo genomic chromosome, chr_5	81.04	239	1.31e-58	3656	Cucumis melo	muskmelon	Eukaryota
Contig193	Cucumis melo genomic scaffold, unanchored_scaffold01487	78.201	174	3.76e-39	3656	Cucumis melo	muskmelon	Eukaryota
Contig196	Cucumis melo genomic chromosome, chr_4	82.721	457	4.23e-124	3656	Cucumis melo	muskmelon	Eukaryota
Contig197	Cucumis melo genomic chromosome, chr_6	85.714	289	1.63e-73	3656	Cucumis melo	muskmelon	Eukaryota
Contig200	Cucumis melo genomic chromosome, chr_11	93.75	191	2.33e-44	3656	Cucumis melo	muskmelon	Eukaryota
Contig201	Cucumis melo genomic chromosome, chr_5	85.24	534	1.4e-147	3656	Cucumis melo	muskmelon	Eukaryota
Contig202	Cucumis melo genomic chromosome, chr_5	90.87	621	8.53e-174	3656	Cucumis melo	muskmelon	Eukaryota
Contig203	Cucumis melo genomic chromosome, chr_2	86.614	274	3.37e-69	3656	Cucumis melo	muskmelon	Eukaryota
Contig204	Cucumis melo genomic chromosome, chr_4	75.806	156	2.95e-33	3656	Cucumis melo	muskmelon	Eukaryota
Contig207	Cucumis melo genomic chromosome, chr_9	91.713	252	2.48e-62	3656	Cucumis melo	muskmelon	Eukaryota
Contig210	Cucumis melo genomic chromosome, chr_9	79.688	303	3.48e-78	3656	Cucumis melo	muskmelon	Eukaryota
Contig214	Cucumis melo genomic chromosome, chr_12	80.569	159	1.23e-34	3656	Cucumis melo	muskmelon	Eukaryota
Contig217	Cucumis melo genomic scaffold, unanchored_scaffold00460	77.797	316	4.33e-82	3656	Cucumis melo	muskmelon	Eukaryota
Contig219	Cucumis melo genomic chromosome, chr_10	80.227	449	4.68e-122	3656	Cucumis melo	muskmelon	Eukaryota
Contig220	Cucumis melo genomic chromosome, chr_4	88.136	276	9.11e-70	3656	Cucumis melo	muskmelon	Eukaryota
Contig221	Cucumis melo genomic chromosome, chr_1	82.479	1236	0	3656	Cucumis melo	muskmelon	Eukaryota
Contig223	Cucumis melo genomic chromosome, chr_5	82.234	438	7.33e-119	3656	Cucumis melo	muskmelon	Eukaryota
Contig224	Cucumis melo genomic chromosome, chr_10	85.34	385	1.14e-102	3656	Cucumis melo	muskmelon	Eukaryota
Contig225	Cucumis melo genomic chromosome, chr_5	86.651	457	3.02e-124	3656	Cucumis melo	muskmelon	Eukaryota
Contig226	Cucumis melo genomic chromosome, chr_11	78.085	254	4.64e-63	3656	Cucumis melo	muskmelon	Eukaryota
Contig228	Cucumis melo genomic chromosome, chr_7	87.77	161	3.16e-35	3656	Cucumis melo	muskmelon	Eukaryota
Contig229	Cucumis melo genomic chromosome, chr_7	92.857	180	6.98e-41	3656	Cucumis melo	muskmelon	Eukaryota
Contig230	Cucumis melo genomic chromosome, chr_8	81.957	375	7.34e-100	3656	Cucumis melo	muskmelon	Eukaryota
Contig231	Cucumis melo genomic chromosome, chr_8	91.887	841	0	3656	Cucumis melo	muskmelon	Eukaryota
Contig232	Cucumis melo genomic chromosome, chr_2	88.9	1171	0	3656	Cucumis melo	muskmelon	Eukaryota
Contig237	Cucumis melo genomic chromosome, chr_7	86.358	898	0	3656	Cucumis melo	muskmelon	Eukaryota
Contig238	Cucumis melo genomic chromosome, chr_4	80.588	126	2.14e-24	3656	Cucumis melo	muskmelon	Eukaryota
Contig240	Cucumis melo genomic chromosome, chr_6	81.218	291	4.87e-74	3656	Cucumis melo	muskmelon	Eukaryota
Contig241	Cucumis melo genomic chromosome, chr_5	84.615	137	3.77e-28	3656	Cucumis melo	muskmelon	Eukaryota
Contig244	Cucumis melo genomic chromosome, chr_1	78.959	300	3.54e-77	3656	Cucumis melo	muskmelon	Eukaryota
Contig246	Cucumis melo genomic chromosome, chr_7	93.147	577	2.17e-160	3656	Cucumis melo	muskmelon	Eukaryota
Contig250	Cucumis melo genomic chromosome, chr_5	82.394	957	0	3656	Cucumis melo	muskmelon	Eukaryota
Contig251	Cucumis melo genomic chromosome, chr_2	91.429	191	6.18e-44	3656	Cucumis melo	muskmelon	Eukaryota
Contig255	Cucumis melo genomic chromosome, chr_7	87.148	3182	0	3656	Cucumis melo	muskmelon	Eukaryota
Contig260	Cucumis melo genomic chromosome, chr_8	81.454	2946	0	3656	Cucumis melo	muskmelon	Eukaryota
Contig261	Cucumis melo genomic chromosome, chr_1	93.386	3374	0	3656	Cucumis melo	muskmelon	Eukaryota
Contig266	Cucumis melo genomic chromosome, chr_11	90.531	2920	0	3656	Cucumis melo	muskmelon	Eukaryota
Contig275	Cucumis melo genomic chromosome, chr_11	95.385	5736	0	3656	Cucumis melo	muskmelon	Eukaryota
Contig283	PREDICTED: Cucumis melo condensin-2 complex subunit D3 (LOC103497846), mRNA	95.849	1753	0	3656	Cucumis melo	muskmelon	Eukaryota
Contig291	Cucumis melo genomic chromosome, chr_7	78.7	2298	0	3656	Cucumis melo	muskmelon	Eukaryota
Contig292	Cucumis melo genomic chromosome, chr_10	81.345	435	1.58e-116	3656	Cucumis melo	muskmelon	Eukaryota
Contig293	Cucumis melo genomic chromosome, chr_8	82.979	2948	0	3656	Cucumis melo	muskmelon	Eukaryota
Contig294	Cucumis melo genomic chromosome, chr_9	90.213	1205	0	3656	Cucumis melo	muskmelon	Eukaryota
Contig309	Cucumis melo genomic chromosome, chr_1	89.681	5445	0	3656	Cucumis melo	muskmelon	Eukaryota
Contig310	Cucumis melo genomic chromosome, chr_6	92.044	1020	0	3656	Cucumis melo	muskmelon	Eukaryota
Contig311	Cucumis melo genomic chromosome, chr_1	86.983	706	0	3656	Cucumis melo	muskmelon	Eukaryota
Contig323	Cucumis melo genomic chromosome, chr_12	75.944	2017	0	3656	Cucumis melo	muskmelon	Eukaryota
Contig324	Cucumis melo genomic chromosome, chr_6	71.957	329	5.51e-85	3656	Cucumis melo	muskmelon	Eukaryota
Contig326	Cucumis melo genomic chromosome, chr_4	87.78	1779	0	3656	Cucumis melo	muskmelon	Eukaryota
Contig330	Cucumis melo genomic chromosome, chr_11	82.744	407	2.37e-108	3656	Cucumis melo	muskmelon	Eukaryota
Contig335	Cucumis melo genomic chromosome, chr_9	83.985	4080	0	3656	Cucumis melo	muskmelon	Eukaryota
Contig336	Cucumis melo genomic chromosome, chr_2	87.082	2880	0	3656	Cucumis melo	muskmelon	Eukaryota
Contig338	Cucumis melo genomic chromosome, chr_1	79.14	577	1.6e-159	3656	Cucumis melo	muskmelon	Eukaryota
Contig343	Cucumis melo genomic chromosome, chr_12	93.013	664	0	3656	Cucumis melo	muskmelon	Eukaryota
Contig344	Cucumis melo genomic chromosome, chr_9	82.938	3572	0	3656	Cucumis melo	muskmelon	Eukaryota
Contig347	Cucumis melo genomic chromosome, chr_6	87.876	2425	0	3656	Cucumis melo	muskmelon	Eukaryota
Contig348	Cucumis melo genomic chromosome, chr_12	86.251	1587	0	3656	Cucumis melo	muskmelon	Eukaryota
Contig357	Cucumis melo genomic chromosome, chr_8	87.765	1714	0	3656	Cucumis melo	muskmelon	Eukaryota
Contig359	Cucumis melo genomic chromosome, chr_11	85.255	3868	0	3656	Cucumis melo	muskmelon	Eukaryota
Contig362	Cucumis melo genomic chromosome, chr_3	81.49	326	5.67e-84	3656	Cucumis melo	muskmelon	Eukaryota
Contig365	Cucumis melo genomic chromosome, chr_4	85	955	0	3656	Cucumis melo	muskmelon	Eukaryota
Contig367	Cucumis melo genomic chromosome, chr_1	91.391	2839	0	3656	Cucumis melo	muskmelon	Eukaryota
Contig371	Cucumis melo genomic chromosome, chr_10	86.567	1240	0	3656	Cucumis melo	muskmelon	Eukaryota
Contig372	Cucumis melo genomic chromosome, chr_5	88.709	5288	0	3656	Cucumis melo	muskmelon	Eukaryota
Contig373	Cucumis melo genomic chromosome, chr_8	86.742	580	1.05e-160	3656	Cucumis melo	muskmelon	Eukaryota
Contig376	Cucumis melo genomic chromosome, chr_1	92.153	756	0	3656	Cucumis melo	muskmelon	Eukaryota
Contig379	Cucumis melo genomic chromosome, chr_8	82.083	520	2.24e-142	3656	Cucumis melo	muskmelon	Eukaryota
Contig385	Cucumis melo genomic chromosome, chr_4	82.999	638	5.81e-178	3656	Cucumis melo	muskmelon	Eukaryota
Contig391	PREDICTED: Cucumis melo E3 ubiquitin-protein ligase RING1 (LOC103502070), mRNA	92.395	370	2.3e-97	3656	Cucumis melo	muskmelon	Eukaryota
Contig392	Cucumis melo genomic chromosome, chr_3	89.691	732	0	3656	Cucumis melo	muskmelon	Eukaryota
Contig393	Cucumis melo genomic chromosome, chr_2	78.431	327	1.4e-84	3656	Cucumis melo	muskmelon	Eukaryota
Contig394	Cucumis melo genomic chromosome, chr_5	90.209	3699	0	3656	Cucumis melo	muskmelon	Eukaryota
Contig397	Cucumis melo genomic chromosome, chr_8	92.408	538	5.91e-148	3656	Cucumis melo	muskmelon	Eukaryota
Contig400	Cucumis melo genomic chromosome, chr_8	83.313	721	0	3656	Cucumis melo	muskmelon	Eukaryota
Contig405	Cucumis melo genomic chromosome, chr_3	86.834	1059	0	3656	Cucumis melo	muskmelon	Eukaryota
Contig409	Cucumis melo genomic chromosome, chr_10	81.288	1428	0	3656	Cucumis melo	muskmelon	Eukaryota
Contig415	Cucumis melo genomic chromosome, chr_8	81.03	2392	0	3656	Cucumis melo	muskmelon	Eukaryota
Contig416	Cucumis melo genomic chromosome, chr_8	77.61	1938	0	3656	Cucumis melo	muskmelon	Eukaryota
Contig419	Cucumis melo genomic chromosome, chr_11	91.258	1513	0	3656	Cucumis melo	muskmelon	Eukaryota
Contig422	Cucumis melo genomic chromosome, chr_2	80.028	492	4.16e-134	3656	Cucumis melo	muskmelon	Eukaryota
Contig423	Cucumis melo genomic chromosome, chr_3	79.869	630	8.44e-176	3656	Cucumis melo	muskmelon	Eukaryota
Contig424	Cucumis melo genomic chromosome, chr_9	84.029	385	7.17e-102	3656	Cucumis melo	muskmelon	Eukaryota
Contig428	Cucumis melo genomic chromosome, chr_1	87.43	1397	0	3656	Cucumis melo	muskmelon	Eukaryota
Contig431	Cucumis melo genomic chromosome, chr_4	81.594	2180	0	3656	Cucumis melo	muskmelon	Eukaryota
Contig432	Cucumis melo genomic chromosome, chr_4	92.798	1903	0	3656	Cucumis melo	muskmelon	Eukaryota
Contig446	Cucumis melo genomic chromosome, chr_8	88.415	2246	0	3656	Cucumis melo	muskmelon	Eukaryota
Contig447	Cucumis melo genomic chromosome, chr_12	76.417	217	2.59e-51	3656	Cucumis melo	muskmelon	Eukaryota
Contig450	Cucumis melo genomic chromosome, chr_1	83.987	540	1.34e-148	3656	Cucumis melo	muskmelon	Eukaryota
Contig454	Cucumis melo genomic chromosome, chr_1	85.511	676	0	3656	Cucumis melo	muskmelon	Eukaryota
Contig455	Cucumis melo genomic chromosome, chr_11	90.294	1871	0	3656	Cucumis melo	muskmelon	Eukaryota
Contig458	Cucumis melo genomic chromosome, chr_1	84.318	422	4.99e-113	3656	Cucumis melo	muskmelon	Eukaryota
Contig460	Cucumis melo genomic chromosome, chr_7	90.78	187	1.98e-42	3656	Cucumis melo	muskmelon	Eukaryota
Contig461	Cucumis melo genomic chromosome, chr_5	94.126	1053	0	3656	Cucumis melo	muskmelon	Eukaryota
Contig466	Cucumis melo genomic chromosome, chr_11	87.794	1572	0	3656	Cucumis melo	muskmelon	Eukaryota
Contig468	Cucumis melo genomic chromosome, chr_5	93.687	1616	0	3656	Cucumis melo	muskmelon	Eukaryota
Contig469	Cucumis melo genomic chromosome, chr_8	93.094	3061	0	3656	Cucumis melo	muskmelon	Eukaryota
Contig470	Cucumis melo genomic chromosome, chr_11	89.514	1123	0	3656	Cucumis melo	muskmelon	Eukaryota
Contig473	Cucumis melo genomic chromosome, chr_2	90.519	3530	0	3656	Cucumis melo	muskmelon	Eukaryota
Contig476	Cucumis melo genomic chromosome, chr_7	81.942	398	8.08e-106	3656	Cucumis melo	muskmelon	Eukaryota
Contig480	Cucumis melo genomic chromosome, chr_9	84.615	333	2.28e-86	3656	Cucumis melo	muskmelon	Eukaryota
Contig482	Cucumis melo genomic chromosome, chr_7	90.934	987	0	3656	Cucumis melo	muskmelon	Eukaryota
Contig483	Cucumis melo genomic chromosome, chr_10	91.475	1247	0	3656	Cucumis melo	muskmelon	Eukaryota
Contig485	Cucumis melo genomic chromosome, chr_6	78.771	745	0	3656	Cucumis melo	muskmelon	Eukaryota
Contig490	Cucumis melo genomic chromosome, chr_6	85.782	630	6.89e-176	3656	Cucumis melo	muskmelon	Eukaryota
Contig491	Cucumis melo genomic chromosome, chr_1	88.636	737	0	3656	Cucumis melo	muskmelon	Eukaryota
Contig492	Cucumis melo genomic chromosome, chr_1	83.204	1958	0	3656	Cucumis melo	muskmelon	Eukaryota
Contig494	Cucumis melo genomic chromosome, chr_9	77.454	202	6.31e-47	3656	Cucumis melo	muskmelon	Eukaryota
Contig496	Cucumis melo genomic chromosome, chr_7	87.943	636	1.45e-177	3656	Cucumis melo	muskmelon	Eukaryota
Contig497	Cucumis melo genomic chromosome, chr_7	87.827	736	0	3656	Cucumis melo	muskmelon	Eukaryota
Contig500	Cucumis melo genomic chromosome, chr_7	85.638	577	8.83e-160	3656	Cucumis melo	muskmelon	Eukaryota
Contig501	Cucumis melo genomic chromosome, chr_11	83.574	2560	0	3656	Cucumis melo	muskmelon	Eukaryota
Contig502	Cucumis melo genomic chromosome, chr_8	85.539	398	7.34e-106	3656	Cucumis melo	muskmelon	Eukaryota
Contig503	Cucumis melo genomic chromosome, chr_1	86.98	983	0	3656	Cucumis melo	muskmelon	Eukaryota
Contig504	Cucumis melo genomic chromosome, chr_6	77.618	403	1.58e-107	3656	Cucumis melo	muskmelon	Eukaryota
Contig508	Cucumis melo genomic chromosome, chr_5	88.83	448	7.07e-121	3656	Cucumis melo	muskmelon	Eukaryota
Contig509	Cucumis melo genomic chromosome, chr_1	87.461	350	2.05e-91	3656	Cucumis melo	muskmelon	Eukaryota
Contig510	Cucumis melo genomic scaffold, unassembled_sequence35082	95.793	998	0	3656	Cucumis melo	muskmelon	Eukaryota
Contig516	Cucumis melo genomic chromosome, chr_5	90.863	525	3.11e-144	3656	Cucumis melo	muskmelon	Eukaryota
Contig517	Cucumis melo genomic chromosome, chr_10	86.111	656	0	3656	Cucumis melo	muskmelon	Eukaryota
Contig519	Cucumis melo genomic chromosome, chr_12	87.862	832	0	3656	Cucumis melo	muskmelon	Eukaryota
Contig521	Cucumis melo genomic chromosome, chr_2	78.83	521	3.97e-143	3656	Cucumis melo	muskmelon	Eukaryota
Contig526	Cucumis melo genomic chromosome, chr_3	92.141	710	0	3656	Cucumis melo	muskmelon	Eukaryota
Contig528	Cucumis melo genomic chromosome, chr_5	85.084	623	1.04e-173	3656	Cucumis melo	muskmelon	Eukaryota
Contig532	Cucumis melo genomic chromosome, chr_1	89.356	490	1.09e-133	3656	Cucumis melo	muskmelon	Eukaryota
Contig533	Cucumis melo genomic chromosome, chr_9	80.251	351	5.32e-92	3656	Cucumis melo	muskmelon	Eukaryota
Contig536	Cucumis melo genomic chromosome, chr_6	82.44	2290	0	3656	Cucumis melo	muskmelon	Eukaryota
Contig537	Cucumis melo genomic chromosome, chr_7	81.148	1724	0	3656	Cucumis melo	muskmelon	Eukaryota
Contig538	Cucumis melo genomic chromosome, chr_1	85.29	1354	0	3656	Cucumis melo	muskmelon	Eukaryota
Contig539	Cucumis melo genomic chromosome, chr_11	95.349	135	5.74e-27	3656	Cucumis melo	muskmelon	Eukaryota
Contig540	Cucumis melo genomic chromosome, chr_11	95.238	1123	0	3656	Cucumis melo	muskmelon	Eukaryota
Contig541	Cucumis melo genomic chromosome, chr_9	87.988	2204	0	3656	Cucumis melo	muskmelon	Eukaryota
Contig542	Cucumis melo genomic chromosome, chr_8	86.234	392	3.07e-104	3656	Cucumis melo	muskmelon	Eukaryota
Contig543	Cucumis melo genomic chromosome, chr_9	85.804	641	2.76e-179	3656	Cucumis melo	muskmelon	Eukaryota
Contig544	Cucumis melo genomic chromosome, chr_7	83.857	390	1.09e-103	3656	Cucumis melo	muskmelon	Eukaryota
Contig545	Cucumis melo genomic chromosome, chr_7	83.058	628	2.13e-175	3656	Cucumis melo	muskmelon	Eukaryota
Contig548	Cucumis melo genomic chromosome, chr_3	89.526	490	1.04e-133	3656	Cucumis melo	muskmelon	Eukaryota
Contig549	Cucumis melo genomic chromosome, chr_1	86.791	1170	0	3656	Cucumis melo	muskmelon	Eukaryota
Contig550	Cucumis melo genomic chromosome, chr_1	92.782	2438	0	3656	Cucumis melo	muskmelon	Eukaryota
Contig553	Cucumis melo genomic chromosome, chr_11	82.286	409	2.97e-109	3656	Cucumis melo	muskmelon	Eukaryota
Contig556	Cucumis melo genomic chromosome, chr_4	89.073	1303	0	3656	Cucumis melo	muskmelon	Eukaryota
Contig557	PREDICTED: Cucumis melo uncharacterized LOC107990875 (LOC107990875), ncRNA	79.913	1314	0	3656	Cucumis melo	muskmelon	Eukaryota
Contig558	Cucumis melo genomic scaffold, unassembled_sequence42509	90.441	525	2.81e-144	3656	Cucumis melo	muskmelon	Eukaryota
Contig559	Cucumis melo genomic chromosome, chr_8	77.452	468	4.8e-127	3656	Cucumis melo	muskmelon	Eukaryota
Contig560	Cucumis melo genomic chromosome, chr_12	89.034	1851	0	3656	Cucumis melo	muskmelon	Eukaryota
Contig563	Cucumis melo genomic chromosome, chr_2	83.946	937	0	3656	Cucumis melo	muskmelon	Eukaryota
Contig567	Cucumis melo genomic chromosome, chr_5	82.452	326	3.03e-84	3656	Cucumis melo	muskmelon	Eukaryota
Contig570	Cucumis melo genomic chromosome, chr_9	81.475	438	3.68e-118	3656	Cucumis melo	muskmelon	Eukaryota
Contig571	Cucumis melo genomic chromosome, chr_5	86.458	1548	0	3656	Cucumis melo	muskmelon	Eukaryota
Contig572	Cucumis melo genomic chromosome, chr_6	86.872	383	1.74e-101	3656	Cucumis melo	muskmelon	Eukaryota
Contig573	Cucumis melo genomic chromosome, chr_1	81.385	523	9.82e-144	3656	Cucumis melo	muskmelon	Eukaryota
Contig574	Cucumis melo genomic chromosome, chr_1	73.682	760	0	3656	Cucumis melo	muskmelon	Eukaryota
Contig575	Cucumis melo genomic scaffold, unassembled_sequence31136	83.934	326	2.96e-84	3656	Cucumis melo	muskmelon	Eukaryota
Contig576	Cucumis melo genomic chromosome, chr_8	77.248	488	3.57e-133	3656	Cucumis melo	muskmelon	Eukaryota
Contig578	Cucumis melo genomic chromosome, chr_2	87.439	1369	0	3656	Cucumis melo	muskmelon	Eukaryota
Contig581	Cucumis melo genomic chromosome, chr_3	81.697	449	1.67e-121	3656	Cucumis melo	muskmelon	Eukaryota
Contig584	Cucumis melo genomic chromosome, chr_11	84.27	656	0	3656	Cucumis melo	muskmelon	Eukaryota
Contig585	Cucumis melo genomic chromosome, chr_10	84.543	390	1.02e-103	3656	Cucumis melo	muskmelon	Eukaryota
Contig586	Cucumis melo genomic chromosome, chr_6	85.845	438	3.59e-118	3656	Cucumis melo	muskmelon	Eukaryota
Contig587	Cucumis melo genomic chromosome, chr_9	85.098	741	0	3656	Cucumis melo	muskmelon	Eukaryota
Contig588	Cucumis melo genomic chromosome, chr_11	85.811	455	3.55e-123	3656	Cucumis melo	muskmelon	Eukaryota
Contig589	Cucumis melo genomic chromosome, chr_8	90.608	475	2.72e-129	3656	Cucumis melo	muskmelon	Eukaryota
Contig591	Cucumis melo genomic chromosome, chr_3	84.925	601	4.29e-167	3656	Cucumis melo	muskmelon	Eukaryota
Contig592	Cucumis melo genomic chromosome, chr_5	87.627	556	9.4e-154	3656	Cucumis melo	muskmelon	Eukaryota
Contig594	Cucumis melo genomic chromosome, chr_7	77.283	213	2.34e-50	3656	Cucumis melo	muskmelon	Eukaryota
Contig595	Cucumis melo genomic chromosome, chr_4	89.171	1038	0	3656	Cucumis melo	muskmelon	Eukaryota
Contig596	Cucumis melo genomic chromosome, chr_5	88.853	1485	0	3656	Cucumis melo	muskmelon	Eukaryota
Contig597	Cucumis melo genomic chromosome, chr_6	87.025	486	1.25e-132	3656	Cucumis melo	muskmelon	Eukaryota
Contig598	Cucumis melo genomic chromosome, chr_8	85.148	1371	0	3656	Cucumis melo	muskmelon	Eukaryota
Contig600	Cucumis melo genomic chromosome, chr_10	93.633	394	7.71e-105	3656	Cucumis melo	muskmelon	Eukaryota
Contig602	Cucumis melo genomic chromosome, chr_7	78.495	538	3.36e-148	3656	Cucumis melo	muskmelon	Eukaryota
Contig603	Cucumis melo genomic chromosome, chr_3	77.544	348	6.07e-91	3656	Cucumis melo	muskmelon	Eukaryota
Contig605	Cucumis melo genomic chromosome, chr_4	86.829	856	0	3656	Cucumis melo	muskmelon	Eukaryota
Contig606	Cucumis melo genomic chromosome, chr_7	93.959	948	0	3656	Cucumis melo	muskmelon	Eukaryota
Contig607	Cucumis melo genomic chromosome, chr_5	91.434	730	0	3656	Cucumis melo	muskmelon	Eukaryota
Contig609	Cucumis melo genomic chromosome, chr_2	84.375	217	1.78e-51	3656	Cucumis melo	muskmelon	Eukaryota
Contig611	Cucumis melo genomic chromosome, chr_1	81.151	361	7.72e-95	3656	Cucumis melo	muskmelon	Eukaryota
Contig612	Cucumis melo genomic scaffold, unassembled_sequence31289	93.228	928	0	3656	Cucumis melo	muskmelon	Eukaryota
Contig613	Cucumis melo genomic chromosome, chr_9	81.857	538	3.32e-148	3656	Cucumis melo	muskmelon	Eukaryota
Contig614	Cucumis melo genomic chromosome, chr_6	91.436	540	9.2e-149	3656	Cucumis melo	muskmelon	Eukaryota
Contig615	Cucumis melo genomic chromosome, chr_9	88.186	542	2.55e-149	3656	Cucumis melo	muskmelon	Eukaryota
Contig616	Cucumis melo genomic chromosome, chr_11	85.938	195	8.19e-45	3656	Cucumis melo	muskmelon	Eukaryota
Contig619	Cucumis melo genomic chromosome, chr_4	84.229	250	1.72e-61	3656	Cucumis melo	muskmelon	Eukaryota
Contig621	Cucumis melo genomic chromosome, chr_1	84.029	743	0	3656	Cucumis melo	muskmelon	Eukaryota
Contig622	Cucumis melo genomic chromosome, chr_11	80.093	455	3.37e-123	3656	Cucumis melo	muskmelon	Eukaryota
Contig624	Cucumis melo genomic chromosome, chr_9	91	134	1.78e-26	3656	Cucumis melo	muskmelon	Eukaryota
Contig625	Cucumis melo genomic chromosome, chr_9	82.912	582	1.47e-161	3656	Cucumis melo	muskmelon	Eukaryota
Contig626	Cucumis melo genomic chromosome, chr_4	80.717	152	4.91e-32	3656	Cucumis melo	muskmelon	Eukaryota
Contig627	Cucumis melo genomic chromosome, chr_9	83.631	305	3.56e-78	3656	Cucumis melo	muskmelon	Eukaryota
Contig629	Cucumis melo genomic chromosome, chr_3	81.381	630	5.15e-176	3656	Cucumis melo	muskmelon	Eukaryota
Contig630	Cucumis melo genomic chromosome, chr_4	83.633	503	1.17e-137	3656	Cucumis melo	muskmelon	Eukaryota
Contig631	Cucumis melo genomic chromosome, chr_4	90.991	2182	0	3656	Cucumis melo	muskmelon	Eukaryota
Contig632	Cucumis melo genomic chromosome, chr_2	87.567	2350	0	3656	Cucumis melo	muskmelon	Eukaryota
Contig634	Cucumis melo genomic chromosome, chr_7	90.373	416	1.56e-111	3656	Cucumis melo	muskmelon	Eukaryota
Contig635	Cucumis melo genomic chromosome, chr_9	87.536	379	2.04e-100	3656	Cucumis melo	muskmelon	Eukaryota
Contig636	Cucumis melo genomic chromosome, chr_1	93.619	1548	0	3656	Cucumis melo	muskmelon	Eukaryota
Contig637	Cucumis melo genomic chromosome, chr_6	86.42	257	9.95e-64	3656	Cucumis melo	muskmelon	Eukaryota
Contig640	Cucumis melo genomic chromosome, chr_6	92.513	268	4.58e-67	3656	Cucumis melo	muskmelon	Eukaryota
Contig642	Cucumis melo genomic chromosome, chr_8	87.472	488	3.22e-133	3656	Cucumis melo	muskmelon	Eukaryota
Contig643	Cucumis melo genomic chromosome, chr_5	91.28	725	0	3656	Cucumis melo	muskmelon	Eukaryota
Contig645	Cucumis melo genomic chromosome, chr_6	83.964	580	5.16e-161	3656	Cucumis melo	muskmelon	Eukaryota
Contig646	Cucumis melo genomic chromosome, chr_1	81.637	357	9.43e-94	3656	Cucumis melo	muskmelon	Eukaryota
Contig647	Cucumis melo genomic chromosome, chr_8	89.865	372	3.37e-98	3656	Cucumis melo	muskmelon	Eukaryota
Contig649	Cucumis melo genomic chromosome, chr_11	77.118	621	3.02e-173	3656	Cucumis melo	muskmelon	Eukaryota
Contig650	Cucumis melo genomic chromosome, chr_10	91.098	451	4.18e-122	3656	Cucumis melo	muskmelon	Eukaryota
Contig651	Cucumis melo genomic chromosome, chr_4	86.008	250	1.63e-61	3656	Cucumis melo	muskmelon	Eukaryota
Contig652	Cucumis melo genomic chromosome, chr_9	87.006	375	2.58e-99	3656	Cucumis melo	muskmelon	Eukaryota
Contig654	Cucumis melo genomic chromosome, chr_11	81.459	966	0	3656	Cucumis melo	muskmelon	Eukaryota
Contig655	Cucumis melo genomic chromosome, chr_5	87.234	671	0	3656	Cucumis melo	muskmelon	Eukaryota
Contig657	Cucumis melo genomic chromosome, chr_6	86.649	409	2.52e-109	3656	Cucumis melo	muskmelon	Eukaryota
Contig659	Cucumis melo genomic chromosome, chr_1	85.547	252	4.49e-62	3656	Cucumis melo	muskmelon	Eukaryota
Contig660	Cucumis melo genomic chromosome, chr_5	88.121	965	0	3656	Cucumis melo	muskmelon	Eukaryota
Contig662	Cucumis melo genomic chromosome, chr_9	87.833	300	1.58e-76	3656	Cucumis melo	muskmelon	Eukaryota
Contig663	Cucumis melo genomic chromosome, chr_10	92.609	3096	0	3656	Cucumis melo	muskmelon	Eukaryota
Contig664	Cucumis melo genomic chromosome, chr_7	88.889	220	1.26e-52	3656	Cucumis melo	muskmelon	Eukaryota
Contig665	Cucumis melo genomic chromosome, chr_4	86.986	156	3.59e-33	3656	Cucumis melo	muskmelon	Eukaryota
Contig666	Cucumis melo genomic chromosome, chr_1	91.362	409	2.49e-109	3656	Cucumis melo	muskmelon	Eukaryota
Contig668	Cucumis melo genomic chromosome, chr_3	83.657	649	0	3656	Cucumis melo	muskmelon	Eukaryota
Contig671	Cucumis melo genomic chromosome, chr_5	83.747	409	2.47e-109	3656	Cucumis melo	muskmelon	Eukaryota
Contig672	Cucumis melo genomic chromosome, chr_5	86.147	472	3.11e-128	3656	Cucumis melo	muskmelon	Eukaryota
Contig673	Cucumis melo genomic scaffold, unanchored_scaffold00383	85.67	645	1.73e-180	3656	Cucumis melo	muskmelon	Eukaryota
Contig677	Cucumis melo genomic chromosome, chr_4	82.157	597	4.89e-166	3656	Cucumis melo	muskmelon	Eukaryota
Contig678	Cucumis melo genomic chromosome, chr_11	81.06	675	0	3656	Cucumis melo	muskmelon	Eukaryota
Contig679	Cucumis melo genomic chromosome, chr_1	82.263	767	0	3656	Cucumis melo	muskmelon	Eukaryota
Contig682	Cucumis melo genomic chromosome, chr_7	91.829	355	3.23e-93	3656	Cucumis melo	muskmelon	Eukaryota
Contig683	Cucumis melo genomic chromosome, chr_4	80.861	158	9.77e-34	3656	Cucumis melo	muskmelon	Eukaryota
Contig685	Cucumis melo genomic chromosome, chr_11	90.299	176	2.69e-39	3656	Cucumis melo	muskmelon	Eukaryota
Contig686	Cucumis melo genomic chromosome, chr_5	94.872	424	8.71e-114	3656	Cucumis melo	muskmelon	Eukaryota
Contig689	Cucumis melo genomic chromosome, chr_9	92.857	536	1.07e-147	3656	Cucumis melo	muskmelon	Eukaryota
Contig690	Cucumis melo genomic chromosome, chr_11	73.737	283	1.54e-71	3656	Cucumis melo	muskmelon	Eukaryota
Contig693	Cucumis melo genomic chromosome, chr_11	81.811	989	0	3656	Cucumis melo	muskmelon	Eukaryota
Contig695	Cucumis melo genomic chromosome, chr_11	86.412	1267	0	3656	Cucumis melo	muskmelon	Eukaryota
Contig696	Cucumis melo genomic chromosome, chr_10	87.136	1847	0	3656	Cucumis melo	muskmelon	Eukaryota
Contig697	Cucumis melo genomic chromosome, chr_11	92.954	532	1.37e-146	3656	Cucumis melo	muskmelon	Eukaryota
Contig698	Cucumis melo genomic chromosome, chr_4	80	385	4.07e-102	3656	Cucumis melo	muskmelon	Eukaryota
Contig699	Cucumis melo genomic chromosome, chr_6	79.071	1387	0	3656	Cucumis melo	muskmelon	Eukaryota
Contig700	Cucumis melo genomic chromosome, chr_2	84.029	364	5.3e-96	3656	Cucumis melo	muskmelon	Eukaryota
Contig702	Cucumis melo genomic chromosome, chr_9	79.592	322	3.22e-83	3656	Cucumis melo	muskmelon	Eukaryota
Contig705	Cucumis melo genomic chromosome, chr_2	88.181	1351	0	3656	Cucumis melo	muskmelon	Eukaryota
Contig707	Cucumis melo genomic chromosome, chr_5	80.68	385	4.02e-102	3656	Cucumis melo	muskmelon	Eukaryota
Contig708	Cucumis melo genomic chromosome, chr_2	80.914	285	4.19e-72	3656	Cucumis melo	muskmelon	Eukaryota
Contig709	Cucumis melo genomic chromosome, chr_8	79.641	625	2.17e-174	3656	Cucumis melo	muskmelon	Eukaryota
Contig711	Cucumis melo genomic chromosome, chr_5	85.417	147	2.06e-30	3656	Cucumis melo	muskmelon	Eukaryota
Contig712	Cucumis melo genomic chromosome, chr_7	81.094	473	8.31e-129	3656	Cucumis melo	muskmelon	Eukaryota
Contig713	Cucumis melo genomic chromosome, chr_2	82.836	333	1.47e-86	3656	Cucumis melo	muskmelon	Eukaryota
Contig715	Cucumis melo genomic chromosome, chr_8	88.964	1282	0	3656	Cucumis melo	muskmelon	Eukaryota
Contig717	Cucumis melo genomic chromosome, chr_4	83.519	398	5.12e-106	3656	Cucumis melo	muskmelon	Eukaryota
Contig719	Cucumis melo genomic chromosome, chr_8	91.276	1229	0	3656	Cucumis melo	muskmelon	Eukaryota
Contig720	Cucumis melo genomic chromosome, chr_11	82.593	233	1.52e-56	3656	Cucumis melo	muskmelon	Eukaryota
Contig721	Cucumis melo genomic chromosome, chr_3	85	446	1.79e-120	3656	Cucumis melo	muskmelon	Eukaryota
Contig722	Cucumis melo genomic chromosome, chr_9	92.405	662	0	3656	Cucumis melo	muskmelon	Eukaryota
Contig723	Cucumis melo genomic chromosome, chr_9	80.282	614	4.64e-171	3656	Cucumis melo	muskmelon	Eukaryota
Contig724	Cucumis melo genomic chromosome, chr_1	82.334	1072	0	3656	Cucumis melo	muskmelon	Eukaryota
Contig725	Cucumis melo genomic chromosome, chr_7	88.671	544	6.17e-150	3656	Cucumis melo	muskmelon	Eukaryota
Contig726	Cucumis melo genomic chromosome, chr_3	95.436	383	1.42e-101	3656	Cucumis melo	muskmelon	Eukaryota
Contig727	Cucumis melo genomic chromosome, chr_9	84.08	712	0	3656	Cucumis melo	muskmelon	Eukaryota
Contig728	Cucumis melo genomic chromosome, chr_9	83.086	1269	0	3656	Cucumis melo	muskmelon	Eukaryota
Contig730	Cucumis melo genomic chromosome, chr_4	81.55	440	8.3e-119	3656	Cucumis melo	muskmelon	Eukaryota
Contig731	Cucumis melo genomic chromosome, chr_10	85.959	1142	0	3656	Cucumis melo	muskmelon	Eukaryota
Contig732	Cucumis melo genomic chromosome, chr_10	78.233	265	5.35e-66	3656	Cucumis melo	muskmelon	Eukaryota
Contig733	Cucumis melo genomic chromosome, chr_8	90.785	383	1.41e-101	3656	Cucumis melo	muskmelon	Eukaryota
Contig734	Cucumis melo genomic chromosome, chr_1	86.381	272	3.19e-68	3656	Cucumis melo	muskmelon	Eukaryota
Contig735	Cucumis melo genomic chromosome, chr_7	87.376	460	6.35e-125	3656	Cucumis melo	muskmelon	Eukaryota
Contig737	Cucumis melo genomic chromosome, chr_12	84.615	409	2.33e-109	3656	Cucumis melo	muskmelon	Eukaryota
Contig738	Cucumis melo genomic chromosome, chr_3	85.598	1003	0	3656	Cucumis melo	muskmelon	Eukaryota
Contig739	Cucumis melo genomic chromosome, chr_4	81.86	494	6.24e-135	3656	Cucumis melo	muskmelon	Eukaryota
Contig740	Cucumis melo genomic chromosome, chr_12	91.479	540	7.9e-149	3656	Cucumis melo	muskmelon	Eukaryota
Contig741	Cucumis melo genomic chromosome, chr_4	94.444	2639	0	3656	Cucumis melo	muskmelon	Eukaryota
Contig742	Cucumis melo genomic chromosome, chr_7	83.9	392	2.33e-104	3656	Cucumis melo	muskmelon	Eukaryota
Contig743	Cucumis melo genomic chromosome, chr_6	81.395	274	8.82e-69	3656	Cucumis melo	muskmelon	Eukaryota
Contig745	Cucumis melo genomic chromosome, chr_1	84.15	324	8.62e-84	3656	Cucumis melo	muskmelon	Eukaryota
Contig747	Cucumis melo genomic chromosome, chr_4	84.873	580	4.62e-161	3656	Cucumis melo	muskmelon	Eukaryota
Contig748	Cucumis melo genomic chromosome, chr_1	86.613	1772	0	3656	Cucumis melo	muskmelon	Eukaryota
Contig750	Cucumis melo genomic chromosome, chr_6	77.886	285	4.05e-72	3656	Cucumis melo	muskmelon	Eukaryota
Contig751	Cucumis melo genomic chromosome, chr_3	86.547	226	2.49e-54	3656	Cucumis melo	muskmelon	Eukaryota
Contig752	Cucumis melo genomic chromosome, chr_8	85.856	403	1.07e-107	3656	Cucumis melo	muskmelon	Eukaryota
Contig753	Cucumis melo genomic scaffold, unanchored_scaffold00504	89.286	675	0	3656	Cucumis melo	muskmelon	Eukaryota
Contig754	Cucumis melo genomic chromosome, chr_12	82.046	390	8.32e-104	3656	Cucumis melo	muskmelon	Eukaryota
Contig755	Cucumis melo genomic chromosome, chr_9	82.686	490	7.97e-134	3656	Cucumis melo	muskmelon	Eukaryota
Contig756	Cucumis melo genomic chromosome, chr_1	84.985	948	0	3656	Cucumis melo	muskmelon	Eukaryota
Contig757	Cucumis melo genomic chromosome, chr_12	83.508	331	5.11e-86	3656	Cucumis melo	muskmelon	Eukaryota
Contig758	Cucumis melo genomic chromosome, chr_8	89.583	479	1.72e-130	3656	Cucumis melo	muskmelon	Eukaryota
Contig760	Cucumis melo genomic chromosome, chr_10	91.65	664	0	3656	Cucumis melo	muskmelon	Eukaryota
Contig761	Cucumis melo genomic chromosome, chr_3	79.284	255	3.16e-63	3656	Cucumis melo	muskmelon	Eukaryota
Contig763	Cucumis melo genomic chromosome, chr_5	84.221	985	0	3656	Cucumis melo	muskmelon	Eukaryota
Contig764	Cucumis melo genomic chromosome, chr_1	77.917	329	1.83e-85	3656	Cucumis melo	muskmelon	Eukaryota
Contig766	Cucumis melo genomic chromosome, chr_5	82.993	235	4.11e-57	3656	Cucumis melo	muskmelon	Eukaryota
Contig767	Cucumis melo genomic chromosome, chr_5	82.898	1029	0	3656	Cucumis melo	muskmelon	Eukaryota
Contig768	Cucumis melo genomic chromosome, chr_7	95.087	544	6e-150	3656	Cucumis melo	muskmelon	Eukaryota
Contig769	Cucumis melo genomic chromosome, chr_3	77.856	525	2.17e-144	3656	Cucumis melo	muskmelon	Eukaryota
Contig770	Cucumis melo genomic chromosome, chr_12	81.853	412	1.76e-110	3656	Cucumis melo	muskmelon	Eukaryota
Contig771	Cucumis melo genomic chromosome, chr_12	77.961	654	0	3656	Cucumis melo	muskmelon	Eukaryota
Contig773	Cucumis melo genomic chromosome, chr_6	90.909	420	1.05e-112	3656	Cucumis melo	muskmelon	Eukaryota
Contig774	Cucumis melo genomic chromosome, chr_1	77.737	590	7.57e-164	3656	Cucumis melo	muskmelon	Eukaryota
Contig775	Cucumis melo genomic chromosome, chr_4	93.455	564	4.58e-156	3656	Cucumis melo	muskmelon	Eukaryota
Contig776	Cucumis melo genomic chromosome, chr_3	81.045	929	0	3656	Cucumis melo	muskmelon	Eukaryota
Contig777	Cucumis melo genomic chromosome, chr_1	86.503	340	8.39e-89	3656	Cucumis melo	muskmelon	Eukaryota
Contig778	Cucumis melo genomic chromosome, chr_3	83.552	616	1.24e-171	3656	Cucumis melo	muskmelon	Eukaryota
Contig779	Cucumis melo genomic chromosome, chr_2	86.42	340	8.36e-89	3656	Cucumis melo	muskmelon	Eukaryota
Contig782	Cucumis melo genomic chromosome, chr_7	84.536	185	4.14e-42	3656	Cucumis melo	muskmelon	Eukaryota
Contig785	Cucumis melo genomic chromosome, chr_4	77.434	322	3.01e-83	3656	Cucumis melo	muskmelon	Eukaryota
Contig789	Cucumis melo genomic chromosome, chr_1	81.886	305	3.01e-78	3656	Cucumis melo	muskmelon	Eukaryota
Contig792	Cucumis melo genomic scaffold, unanchored_scaffold00589	90.111	1151	0	3656	Cucumis melo	muskmelon	Eukaryota
Contig793	Cucumis melo genomic chromosome, chr_12	83.408	767	0	3656	Cucumis melo	muskmelon	Eukaryota
Contig794	Cucumis melo genomic chromosome, chr_7	93.967	1476	0	3656	Cucumis melo	muskmelon	Eukaryota
Contig797	Cucumis melo genomic chromosome, chr_5	88.498	363	1.75e-95	3656	Cucumis melo	muskmelon	Eukaryota
Contig799	Cucumis melo genomic chromosome, chr_4	79.35	285	3.88e-72	3656	Cucumis melo	muskmelon	Eukaryota
Contig801	Cucumis melo genomic chromosome, chr_12	84.292	797	0	3656	Cucumis melo	muskmelon	Eukaryota
Contig803	Cucumis melo genomic chromosome, chr_7	81.366	130	1.92e-25	3656	Cucumis melo	muskmelon	Eukaryota
Contig805	Cucumis melo genomic chromosome, chr_12	81.829	623	7.21e-174	3656	Cucumis melo	muskmelon	Eukaryota
Contig806	Cucumis melo genomic chromosome, chr_5	84.469	590	7.31e-164	3656	Cucumis melo	muskmelon	Eukaryota
Contig807	Cucumis melo genomic chromosome, chr_8	81.379	211	6.65e-50	3656	Cucumis melo	muskmelon	Eukaryota
Contig808	Cucumis melo genomic chromosome, chr_1	88.04	708	0	3656	Cucumis melo	muskmelon	Eukaryota
Contig810	Cucumis melo genomic chromosome, chr_8	85.204	374	7.99e-99	3656	Cucumis melo	muskmelon	Eukaryota
Contig811	Cucumis melo genomic chromosome, chr_4	85.51	929	0	3656	Cucumis melo	muskmelon	Eukaryota
Contig812	Cucumis melo genomic chromosome, chr_3	91.075	1801	0	3656	Cucumis melo	muskmelon	Eukaryota
Contig814	Cucumis melo genomic chromosome, chr_1	88.42	1182	0	3656	Cucumis melo	muskmelon	Eukaryota
Contig816	Cucumis melo genomic chromosome, chr_6	87.376	438	2.78e-118	3656	Cucumis melo	muskmelon	Eukaryota
Contig819	Cucumis melo genomic chromosome, chr_4	85.635	730	0	3656	Cucumis melo	muskmelon	Eukaryota
Contig820	Cucumis melo genomic chromosome, chr_1	82.578	329	1.73e-85	3656	Cucumis melo	muskmelon	Eukaryota
Contig821	Cucumis melo genomic chromosome, chr_3	77.162	291	8.17e-74	3656	Cucumis melo	muskmelon	Eukaryota
Contig825	Cucumis melo genomic chromosome, chr_8	83.128	219	3.91e-52	3656	Cucumis melo	muskmelon	Eukaryota
Contig826	Cucumis melo genomic chromosome, chr_3	84.165	1173	0	3656	Cucumis melo	muskmelon	Eukaryota
Contig831	Cucumis melo genomic chromosome, chr_10	82.609	392	2.16e-104	3656	Cucumis melo	muskmelon	Eukaryota
Contig832	Cucumis melo genomic chromosome, chr_8	88.991	257	8.22e-64	3656	Cucumis melo	muskmelon	Eukaryota
Contig833	Cucumis melo genomic chromosome, chr_3	78.872	1243	0	3656	Cucumis melo	muskmelon	Eukaryota
Contig834	Cucumis melo genomic chromosome, chr_4	86.408	316	1.33e-81	3656	Cucumis melo	muskmelon	Eukaryota
Contig837	Cucumis melo genomic chromosome, chr_6	90.741	143	2.39e-29	3656	Cucumis melo	muskmelon	Eukaryota
Contig838	Cucumis melo genomic chromosome, chr_2	93.643	597	4.24e-166	3656	Cucumis melo	muskmelon	Eukaryota
Contig840	Cucumis melo genomic chromosome, chr_12	77.832	337	1.02e-87	3656	Cucumis melo	muskmelon	Eukaryota
Contig841	Cucumis melo genomic chromosome, chr_4	91.405	652	0	3656	Cucumis melo	muskmelon	Eukaryota
Contig842	Cucumis melo genomic chromosome, chr_1	93.665	324	7.92e-84	3656	Cucumis melo	muskmelon	Eukaryota
Contig843	Cucumis melo genomic chromosome, chr_6	86.145	174	8.44e-39	3656	Cucumis melo	muskmelon	Eukaryota
Contig844	Cucumis melo genomic chromosome, chr_3	81.981	704	0	3656	Cucumis melo	muskmelon	Eukaryota
Contig845	Cucumis melo genomic chromosome, chr_6	83.431	721	0	3656	Cucumis melo	muskmelon	Eukaryota
Contig846	Cucumis melo genomic chromosome, chr_3	90.974	549	1.2e-151	3656	Cucumis melo	muskmelon	Eukaryota
Contig847	Cucumis melo genomic chromosome, chr_4	89.566	898	0	3656	Cucumis melo	muskmelon	Eukaryota
Contig849	Cucumis melo genomic chromosome, chr_8	97.866	566	1.19e-156	3656	Cucumis melo	muskmelon	Eukaryota
Contig850	Cucumis melo genomic chromosome, chr_5	87.637	414	4.55e-111	3656	Cucumis melo	muskmelon	Eukaryota
Contig851	Cucumis melo genomic chromosome, chr_12	76.653	320	1.02e-82	3656	Cucumis melo	muskmelon	Eukaryota
Contig852	Cucumis melo genomic chromosome, chr_4	89.463	1171	0	3656	Cucumis melo	muskmelon	Eukaryota
Contig854	Cucumis melo genomic chromosome, chr_1	86.602	1533	0	3656	Cucumis melo	muskmelon	Eukaryota
Contig856	Cucumis melo genomic chromosome, chr_6	85.859	394	5.91e-105	3656	Cucumis melo	muskmelon	Eukaryota
Contig857	Cucumis melo genomic chromosome, chr_1	80.662	289	2.87e-73	3656	Cucumis melo	muskmelon	Eukaryota
Contig859	Cucumis melo genomic chromosome, chr_12	91.75	544	5.54e-150	3656	Cucumis melo	muskmelon	Eukaryota
Contig860	Cucumis melo genomic chromosome, chr_7	86.216	377	5.94e-100	3656	Cucumis melo	muskmelon	Eukaryota
Contig861	Cucumis melo genomic chromosome, chr_2	80.439	364	4.62e-96	3656	Cucumis melo	muskmelon	Eukaryota
Contig863	Cucumis melo genomic chromosome, chr_2	79.289	573	7.02e-159	3656	Cucumis melo	muskmelon	Eukaryota
Contig864	Cucumis melo genomic chromosome, chr_11	85.086	508	2e-139	3656	Cucumis melo	muskmelon	Eukaryota
Contig865	Cucumis melo genomic chromosome, chr_11	89.143	828	0	3656	Cucumis melo	muskmelon	Eukaryota
Contig867	Cucumis melo genomic chromosome, chr_9	80.636	531	4.26e-146	3656	Cucumis melo	muskmelon	Eukaryota
Contig868	Cucumis melo genomic chromosome, chr_11	84.431	1546	0	3656	Cucumis melo	muskmelon	Eukaryota
Contig869	Cucumis melo genomic chromosome, chr_9	92.46	351	3.56e-92	3656	Cucumis melo	muskmelon	Eukaryota
Contig870	Cucumis melo genomic chromosome, chr_1	85.758	342	2.14e-89	3656	Cucumis melo	muskmelon	Eukaryota
Contig871	Cucumis melo genomic chromosome, chr_9	86.297	1725	0	3656	Cucumis melo	muskmelon	Eukaryota
Contig873	Cucumis melo genomic chromosome, chr_4	85.325	950	0	3656	Cucumis melo	muskmelon	Eukaryota
Contig874	Cucumis melo genomic chromosome, chr_12	91.257	246	1.72e-60	3656	Cucumis melo	muskmelon	Eukaryota
Contig875	Cucumis melo genomic chromosome, chr_10	93.661	726	0	3656	Cucumis melo	muskmelon	Eukaryota
Contig876	Cucumis melo genomic chromosome, chr_8	88.235	219	3.76e-52	3656	Cucumis melo	muskmelon	Eukaryota
Contig882	Cucumis melo genomic chromosome, chr_3	94.565	143	2.31e-29	3656	Cucumis melo	muskmelon	Eukaryota
Contig883	Cucumis melo genomic chromosome, chr_12	86.364	202	3.75e-47	3656	Cucumis melo	muskmelon	Eukaryota
Contig885	Cucumis melo genomic chromosome, chr_3	91.209	737	0	3656	Cucumis melo	muskmelon	Eukaryota
Contig886	Cucumis melo genomic chromosome, chr_9	87.189	627	5.22e-175	3656	Cucumis melo	muskmelon	Eukaryota
Contig887	Cucumis melo genomic chromosome, chr_11	78.984	364	4.52e-96	3656	Cucumis melo	muskmelon	Eukaryota
Contig888	Cucumis melo genomic chromosome, chr_5	88.256	1668	0	3656	Cucumis melo	muskmelon	Eukaryota
Contig889	Cucumis melo genomic chromosome, chr_11	77.358	274	7.82e-69	3656	Cucumis melo	muskmelon	Eukaryota
Contig891	Cucumis melo genomic chromosome, chr_8	93.42	1591	0	3656	Cucumis melo	muskmelon	Eukaryota
Contig892	Cucumis melo genomic chromosome, chr_1	90.95	1790	0	3656	Cucumis melo	muskmelon	Eukaryota
Contig897	Cucumis melo genomic chromosome, chr_3	87.32	390	7.4e-104	3656	Cucumis melo	muskmelon	Eukaryota
Contig898	Cucumis melo genomic chromosome, chr_4	87.173	405	2.64e-108	3656	Cucumis melo	muskmelon	Eukaryota
Contig899	Cucumis melo genomic chromosome, chr_9	84.186	403	9.49e-108	3656	Cucumis melo	muskmelon	Eukaryota
Contig900	Cucumis melo genomic chromosome, chr_1	93.594	416	1.22e-111	3656	Cucumis melo	muskmelon	Eukaryota
Contig901	Cucumis melo genomic chromosome, chr_1	87.937	348	4.51e-91	3656	Cucumis melo	muskmelon	Eukaryota
Contig902	Cucumis melo genomic chromosome, chr_8	96.842	477	5.5e-130	3656	Cucumis melo	muskmelon	Eukaryota
Contig903	Cucumis melo genomic chromosome, chr_9	89.756	257	7.8e-64	3656	Cucumis melo	muskmelon	Eukaryota
Contig904	Cucumis melo genomic chromosome, chr_4	83.051	488	2.54e-133	3656	Cucumis melo	muskmelon	Eukaryota
Contig905	Cucumis melo genomic chromosome, chr_2	81.37	339	2.71e-88	3656	Cucumis melo	muskmelon	Eukaryota
Contig906	Cucumis melo genomic chromosome, chr_8	86.472	1410	0	3656	Cucumis melo	muskmelon	Eukaryota
Contig907	Cucumis melo genomic chromosome, chr_9	78.125	403	9.45e-108	3656	Cucumis melo	muskmelon	Eukaryota
Contig908	Cucumis melo genomic chromosome, chr_1	84.19	462	1.54e-125	3656	Cucumis melo	muskmelon	Eukaryota
Contig909	Cucumis melo genomic chromosome, chr_10	84.713	296	1.65e-75	3656	Cucumis melo	muskmelon	Eukaryota
Contig910	Cucumis melo genomic chromosome, chr_6	86.207	150	1.36e-31	3656	Cucumis melo	muskmelon	Eukaryota
Contig912	Cucumis melo genomic chromosome, chr_12	95.442	595	1.45e-165	3656	Cucumis melo	muskmelon	Eukaryota
Contig913	Cucumis melo genomic chromosome, chr_7	81.427	597	4.03e-166	3656	Cucumis melo	muskmelon	Eukaryota
Contig915	Cucumis melo genomic chromosome, chr_4	94.444	248	4.67e-61	3656	Cucumis melo	muskmelon	Eukaryota
Contig916	Cucumis melo genomic chromosome, chr_11	76.715	228	6.08e-55	3656	Cucumis melo	muskmelon	Eukaryota
Contig917	Cucumis melo genomic scaffold, unanchored_scaffold00568	91.806	992	0	3656	Cucumis melo	muskmelon	Eukaryota
Contig919	Cucumis melo genomic chromosome, chr_4	80.983	344	5.77e-90	3656	Cucumis melo	muskmelon	Eukaryota
Contig920	Cucumis melo genomic chromosome, chr_11	78.042	364	4.42e-96	3656	Cucumis melo	muskmelon	Eukaryota
Contig921	Cucumis melo genomic chromosome, chr_6	83.889	316	1.26e-81	3656	Cucumis melo	muskmelon	Eukaryota
Contig924	Cucumis melo genomic chromosome, chr_7	80.856	305	2.71e-78	3656	Cucumis melo	muskmelon	Eukaryota
Contig925	Cucumis melo genomic chromosome, chr_6	88.636	577	5.2e-160	3656	Cucumis melo	muskmelon	Eukaryota
Contig928	Cucumis melo genomic chromosome, chr_5	87.261	174	7.96e-39	3656	Cucumis melo	muskmelon	Eukaryota
Contig929	Cucumis melo genomic chromosome, chr_11	88.932	929	0	3656	Cucumis melo	muskmelon	Eukaryota
Contig930	Cucumis melo genomic chromosome, chr_2	87.923	466	1.17e-126	3656	Cucumis melo	muskmelon	Eukaryota
Contig931	Cucumis melo genomic chromosome, chr_4	82.6	399	1.2e-106	3656	Cucumis melo	muskmelon	Eukaryota
Contig932	Cucumis melo genomic chromosome, chr_1	89.427	278	5.87e-70	3656	Cucumis melo	muskmelon	Eukaryota
Contig933	Cucumis melo genomic chromosome, chr_5	91.176	182	4.74e-41	3656	Cucumis melo	muskmelon	Eukaryota
Contig934	Cucumis melo genomic scaffold, unassembled_sequence33075	76.151	213	1.68e-50	3656	Cucumis melo	muskmelon	Eukaryota
Contig935	Cucumis melo genomic chromosome, chr_3	90.625	289	2.71e-73	3656	Cucumis melo	muskmelon	Eukaryota
Contig941	Cucumis melo genomic chromosome, chr_6	78.058	457	7e-124	3656	Cucumis melo	muskmelon	Eukaryota
Contig942	Cucumis melo genomic chromosome, chr_9	86.225	798	0	3656	Cucumis melo	muskmelon	Eukaryota
Contig943	Cucumis melo genomic chromosome, chr_9	86.474	898	0	3656	Cucumis melo	muskmelon	Eukaryota
Contig944	Cucumis melo genomic scaffold, unassembled_sequence35963	90.058	213	1.67e-50	3656	Cucumis melo	muskmelon	Eukaryota
Contig945	Cucumis melo genomic chromosome, chr_6	86.402	747	0	3656	Cucumis melo	muskmelon	Eukaryota
Contig948	Cucumis melo genomic chromosome, chr_11	93.009	470	8.98e-128	3656	Cucumis melo	muskmelon	Eukaryota
Contig949	Cucumis melo genomic chromosome, chr_2	90.3	1254	0	3656	Cucumis melo	muskmelon	Eukaryota
Contig950	Cucumis melo genomic chromosome, chr_11	89.612	896	0	3656	Cucumis melo	muskmelon	Eukaryota
Contig951	Cucumis melo genomic chromosome, chr_11	81.078	579	1.43e-160	3656	Cucumis melo	muskmelon	Eukaryota
Contig952	Cucumis melo genomic chromosome, chr_11	85.385	128	6.22e-25	3656	Cucumis melo	muskmelon	Eukaryota
Contig954	Cucumis melo genomic chromosome, chr_2	75.971	283	1.25e-71	3656	Cucumis melo	muskmelon	Eukaryota
Contig955	Cucumis melo genomic chromosome, chr_8	89.804	630	3.88e-176	3656	Cucumis melo	muskmelon	Eukaryota
Contig958	Cucumis melo genomic chromosome, chr_1	96.528	237	9.87e-58	3656	Cucumis melo	muskmelon	Eukaryota
Contig959	Cucumis melo genomic chromosome, chr_6	86.8	263	1.63e-65	3656	Cucumis melo	muskmelon	Eukaryota
Contig961	Cucumis melo genomic chromosome, chr_4	84.076	285	3.47e-72	3656	Cucumis melo	muskmelon	Eukaryota
Contig962	Cucumis melo genomic chromosome, chr_11	87.5	579	1.42e-160	3656	Cucumis melo	muskmelon	Eukaryota
Contig963	Cucumis melo genomic chromosome, chr_2	86.26	416	1.18e-111	3656	Cucumis melo	muskmelon	Eukaryota
Contig964	Cucumis melo genomic chromosome, chr_12	85.366	165	4.7e-36	3656	Cucumis melo	muskmelon	Eukaryota
Contig966	Cucumis melo genomic chromosome, chr_2	82.447	159	2.18e-34	3656	Cucumis melo	muskmelon	Eukaryota
Contig968	Cucumis melo genomic chromosome, chr_4	86.73	664	0	3656	Cucumis melo	muskmelon	Eukaryota
Contig969	Cucumis melo genomic chromosome, chr_5	90.646	592	1.82e-164	3656	Cucumis melo	muskmelon	Eukaryota
Contig971	Cucumis melo genomic chromosome, chr_5	81.153	475	1.9e-129	3656	Cucumis melo	muskmelon	Eukaryota
Contig972	Cucumis melo genomic chromosome, chr_4	85.744	473	6.84e-129	3656	Cucumis melo	muskmelon	Eukaryota
Contig974	Cucumis melo genomic chromosome, chr_4	96.241	219	3.54e-52	3656	Cucumis melo	muskmelon	Eukaryota
Contig975	Cucumis melo genomic chromosome, chr_2	79.558	126	2.21e-24	3656	Cucumis melo	muskmelon	Eukaryota
Contig976	Cucumis melo genomic chromosome, chr_5	81.139	401	3.26e-107	3656	Cucumis melo	muskmelon	Eukaryota
Contig977	Cucumis melo genomic chromosome, chr_5	82.592	881	0	3656	Cucumis melo	muskmelon	Eukaryota
Contig978	Cucumis melo genomic chromosome, chr_10	84.419	337	9.34e-88	3656	Cucumis melo	muskmelon	Eukaryota
Contig979	Cucumis melo genomic chromosome, chr_6	81.031	383	1.18e-101	3656	Cucumis melo	muskmelon	Eukaryota
Contig981	Cucumis melo genomic chromosome, chr_11	83.465	207	7.63e-49	3656	Cucumis melo	muskmelon	Eukaryota
Contig982	Cucumis melo genomic chromosome, chr_2	83.422	514	4.01e-141	3656	Cucumis melo	muskmelon	Eukaryota
Contig984	Cucumis melo genomic chromosome, chr_12	85.655	1755	0	3656	Cucumis melo	muskmelon	Eukaryota
Contig988	Cucumis melo genomic chromosome, chr_1	92.048	704	0	3656	Cucumis melo	muskmelon	Eukaryota
Contig991	Cucumis melo genomic chromosome, chr_11	90.977	1219	0	3656	Cucumis melo	muskmelon	Eukaryota
Contig992	Cucumis melo genomic chromosome, chr_1	76.09	725	0	3656	Cucumis melo	muskmelon	Eukaryota
Contig993	Cucumis melo genomic chromosome, chr_4	90.793	941	0	3656	Cucumis melo	muskmelon	Eukaryota
Contig994	Cucumis melo genomic chromosome, chr_4	89.689	769	0	3656	Cucumis melo	muskmelon	Eukaryota
Contig996	Cucumis melo genomic chromosome, chr_4	92.604	1399	0	3656	Cucumis melo	muskmelon	Eukaryota
Contig997	Cucumis melo genomic chromosome, chr_2	76.648	377	5.43e-100	3656	Cucumis melo	muskmelon	Eukaryota
Contig999	Cucumis melo genomic chromosome, chr_10	90.857	695	0	3656	Cucumis melo	muskmelon	Eukaryota
Contig1001	Cucumis melo genomic chromosome, chr_1	84.452	835	0	3656	Cucumis melo	muskmelon	Eukaryota
Contig1002	Cucumis melo genomic scaffold, unassembled_sequence34510	86.957	364	4.22e-96	3656	Cucumis melo	muskmelon	Eukaryota
Contig1004	Cucumis melo genomic chromosome, chr_6	82.883	292	2.02e-74	3656	Cucumis melo	muskmelon	Eukaryota
Contig1005	Cucumis melo genomic chromosome, chr_9	83.6	448	4.06e-121	3656	Cucumis melo	muskmelon	Eukaryota
Contig1006	Cucumis melo genomic chromosome, chr_11	81.818	318	3.32e-82	3656	Cucumis melo	muskmelon	Eukaryota
Contig1007	Cucumis melo genomic chromosome, chr_10	87.889	326	1.99e-84	3656	Cucumis melo	muskmelon	Eukaryota
Contig1008	Cucumis melo genomic chromosome, chr_9	92.14	320	9.24e-83	3656	Cucumis melo	muskmelon	Eukaryota
Contig1010	Cucumis melo genomic scaffold, unassembled_sequence38914	85.209	300	1.2e-76	3656	Cucumis melo	muskmelon	Eukaryota
Contig1011	Cucumis melo genomic chromosome, chr_4	82.027	985	0	3656	Cucumis melo	muskmelon	Eukaryota
Contig1013	Cucumis melo genomic chromosome, chr_3	87.425	556	6.45e-154	3656	Cucumis melo	muskmelon	Eukaryota
Contig1014	Cucumis melo genomic scaffold, unassembled_sequence31598	90.635	808	0	3656	Cucumis melo	muskmelon	Eukaryota
Contig1015	Cucumis melo genomic chromosome, chr_4	84.572	488	2.38e-133	3656	Cucumis melo	muskmelon	Eukaryota
Contig1016	Cucumis melo genomic chromosome, chr_11	75.591	416	1.14e-111	3656	Cucumis melo	muskmelon	Eukaryota
Contig1017	Cucumis melo genomic chromosome, chr_9	84.102	926	0	3656	Cucumis melo	muskmelon	Eukaryota
Contig1018	Cucumis melo genomic chromosome, chr_11	89.634	202	3.47e-47	3656	Cucumis melo	muskmelon	Eukaryota
Contig1019	Cucumis melo genomic chromosome, chr_6	91.409	392	1.92e-104	3656	Cucumis melo	muskmelon	Eukaryota
Contig1020	Cucumis melo genomic chromosome, chr_11	90.164	1692	0	3656	Cucumis melo	muskmelon	Eukaryota
Contig1021	Cucumis melo genomic chromosome, chr_10	79.08	375	1.93e-99	3656	Cucumis melo	muskmelon	Eukaryota
Contig1022	Cucumis melo genomic chromosome, chr_5	90.955	1315	0	3656	Cucumis melo	muskmelon	Eukaryota
Contig1025	Cucumis melo genomic chromosome, chr_10	85.99	625	1.73e-174	3656	Cucumis melo	muskmelon	Eukaryota
Contig1026	Cucumis melo genomic chromosome, chr_4	90.179	283	1.2e-71	3656	Cucumis melo	muskmelon	Eukaryota
Contig1028	Cucumis melo genomic chromosome, chr_2	77.88	124	7.68e-24	3656	Cucumis melo	muskmelon	Eukaryota
Contig1030	Cucumis melo genomic chromosome, chr_1	84.795	318	3.28e-82	3656	Cucumis melo	muskmelon	Eukaryota
Contig1031	Cucumis melo genomic chromosome, chr_6	87.181	1731	0	3656	Cucumis melo	muskmelon	Eukaryota
Contig1032	Cucumis melo genomic chromosome, chr_11	87.831	422	2.43e-113	3656	Cucumis melo	muskmelon	Eukaryota
Contig1033	Cucumis melo genomic chromosome, chr_3	91.093	647	0	3656	Cucumis melo	muskmelon	Eukaryota
Contig1034	Cucumis melo genomic chromosome, chr_2	91.577	632	1.03e-176	3656	Cucumis melo	muskmelon	Eukaryota
Contig1035	Cucumis melo genomic chromosome, chr_8	80.639	337	9.03e-88	3656	Cucumis melo	muskmelon	Eukaryota
Contig1036	Cucumis melo genomic chromosome, chr_5	79.679	231	4.38e-56	3656	Cucumis melo	muskmelon	Eukaryota
Contig1038	Cucumis melo genomic chromosome, chr_4	76.897	156	2.71e-33	3656	Cucumis melo	muskmelon	Eukaryota
Contig1039	Cucumis melo genomic chromosome, chr_8	84.553	230	1.57e-55	3656	Cucumis melo	muskmelon	Eukaryota
Contig1040	Cucumis melo genomic chromosome, chr_2	84.111	939	0	3656	Cucumis melo	muskmelon	Eukaryota
Contig1041	Cucumis melo genomic chromosome, chr_1	83.153	1053	0	3656	Cucumis melo	muskmelon	Eukaryota
Contig1042	Cucumis melo genomic chromosome, chr_9	77.491	139	2.72e-28	3656	Cucumis melo	muskmelon	Eukaryota
Contig1043	Cucumis melo genomic chromosome, chr_11	84.577	195	5.72e-45	3656	Cucumis melo	muskmelon	Eukaryota
Contig1044	Cucumis melo genomic chromosome, chr_7	83.877	1081	0	3656	Cucumis melo	muskmelon	Eukaryota
Contig1045	Cucumis melo genomic chromosome, chr_3	76.692	348	4.14e-91	3656	Cucumis melo	muskmelon	Eukaryota
Contig1048	Cucumis melo genomic chromosome, chr_5	92	551	2.94e-152	3656	Cucumis melo	muskmelon	Eukaryota
Contig1049	Cucumis melo genomic chromosome, chr_6	83.932	468	3.04e-127	3656	Cucumis melo	muskmelon	Eukaryota
Contig1050	Cucumis melo genomic chromosome, chr_10	77.976	507	6.45e-139	3656	Cucumis melo	muskmelon	Eukaryota
Contig1051	Cucumis melo genomic chromosome, chr_6	79.953	558	1.75e-154	3656	Cucumis melo	muskmelon	Eukaryota
Contig1054	Cucumis melo genomic chromosome, chr_6	83.263	1251	0	3656	Cucumis melo	muskmelon	Eukaryota
Contig1055	Cucumis melo genomic chromosome, chr_9	91.624	531	3.82e-146	3656	Cucumis melo	muskmelon	Eukaryota
Contig1056	Cucumis melo genomic chromosome, chr_2	93.83	704	0	3656	Cucumis melo	muskmelon	Eukaryota
Contig1058	Cucumis melo genomic chromosome, chr_2	94.01	1151	0	3656	Cucumis melo	muskmelon	Eukaryota
Contig1059	Cucumis melo genomic chromosome, chr_12	90.599	2161	0	3656	Cucumis melo	muskmelon	Eukaryota
Contig1060	Cucumis melo genomic chromosome, chr_4	78.007	320	8.97e-83	3656	Cucumis melo	muskmelon	Eukaryota
Contig1061	Cucumis melo genomic chromosome, chr_8	84.879	926	0	3656	Cucumis melo	muskmelon	Eukaryota
Contig1062	Cucumis melo genomic chromosome, chr_6	84.161	396	1.45e-105	3656	Cucumis melo	muskmelon	Eukaryota
Contig1063	Cucumis melo genomic chromosome, chr_5	90.548	942	0	3656	Cucumis melo	muskmelon	Eukaryota
Contig1064	Cucumis melo genomic chromosome, chr_12	87.651	372	2.43e-98	3656	Cucumis melo	muskmelon	Eukaryota
Contig1065	Cucumis melo genomic chromosome, chr_5	91.25	324	6.92e-84	3656	Cucumis melo	muskmelon	Eukaryota
Contig1066	Cucumis melo genomic chromosome, chr_3	88.269	1227	0	3656	Cucumis melo	muskmelon	Eukaryota
Contig1067	Cucumis melo genomic chromosome, chr_5	86.313	477	5.01e-130	3656	Cucumis melo	muskmelon	Eukaryota
Contig1068	Cucumis melo genomic chromosome, chr_12	81.979	224	7.2e-54	3656	Cucumis melo	muskmelon	Eukaryota
Contig1069	Cucumis melo genomic chromosome, chr_5	77.524	244	5.52e-60	3656	Cucumis melo	muskmelon	Eukaryota
Contig1071	Cucumis melo genomic chromosome, chr_3	89.971	869	0	3656	Cucumis melo	muskmelon	Eukaryota
Contig1072	Cucumis melo genomic chromosome, chr_2	91.566	226	2e-54	3656	Cucumis melo	muskmelon	Eukaryota
Contig1073	Cucumis melo genomic chromosome, chr_8	82.353	488	2.31e-133	3656	Cucumis melo	muskmelon	Eukaryota
Contig1074	Cucumis melo genomic chromosome, chr_1	84.889	436	8.47e-118	3656	Cucumis melo	muskmelon	Eukaryota
Contig1075	Cucumis melo genomic chromosome, chr_4	81.41	121	9.69e-23	3656	Cucumis melo	muskmelon	Eukaryota
Contig1076	Cucumis melo genomic chromosome, chr_12	89.958	296	1.5e-75	3656	Cucumis melo	muskmelon	Eukaryota
Contig1077	Cucumis melo genomic scaffold, unassembled_sequence35068	90.19	403	8.59e-108	3656	Cucumis melo	muskmelon	Eukaryota
Contig1078	Cucumis melo genomic chromosome, chr_3	91.986	1541	0	3656	Cucumis melo	muskmelon	Eukaryota
Contig1080	Cucumis melo genomic chromosome, chr_1	84.746	388	2.4e-103	3656	Cucumis melo	muskmelon	Eukaryota
Contig1081	Cucumis melo genomic chromosome, chr_11	83.895	235	3.31e-57	3656	Cucumis melo	muskmelon	Eukaryota
Contig1082	Cucumis melo genomic chromosome, chr_2	94.137	460	5.01e-125	3656	Cucumis melo	muskmelon	Eukaryota
Contig1083	Cucumis melo genomic chromosome, chr_1	80.562	316	1.15e-81	3656	Cucumis melo	muskmelon	Eukaryota
Contig1084	Cucumis melo genomic chromosome, chr_6	94.295	455	2.33e-123	3656	Cucumis melo	muskmelon	Eukaryota
Contig1086	Cucumis melo genomic scaffold, unanchored_scaffold01224	83.125	137	9.57e-28	3656	Cucumis melo	muskmelon	Eukaryota
Contig1087	Cucumis melo genomic chromosome, chr_3	86.616	422	2.36e-113	3656	Cucumis melo	muskmelon	Eukaryota
Contig1088	Cucumis melo genomic chromosome, chr_5	83.871	327	5.28e-85	3656	Cucumis melo	muskmelon	Eukaryota
Contig1089	Cucumis melo genomic chromosome, chr_6	84.167	211	5.55e-50	3656	Cucumis melo	muskmelon	Eukaryota
Contig1092	Cucumis melo genomic chromosome, chr_6	87.886	484	2.96e-132	3656	Cucumis melo	muskmelon	Eukaryota
Contig1094	Cucumis melo genomic chromosome, chr_2	80.43	333	1.13e-86	3656	Cucumis melo	muskmelon	Eukaryota
Contig1095	Cucumis melo genomic chromosome, chr_11	93.78	935	0	3656	Cucumis melo	muskmelon	Eukaryota
Contig1096	Cucumis melo genomic chromosome, chr_8	84.479	1308	0	3656	Cucumis melo	muskmelon	Eukaryota
Contig1097	Cucumis melo genomic chromosome, chr_7	81.545	183	1.21e-41	3656	Cucumis melo	muskmelon	Eukaryota
Contig1099	Cucumis melo genomic chromosome, chr_1	79.026	178	5.6e-40	3656	Cucumis melo	muskmelon	Eukaryota
Contig1100	Cucumis melo genomic chromosome, chr_11	85.901	708	0	3656	Cucumis melo	muskmelon	Eukaryota
Contig1101	Cucumis melo genomic chromosome, chr_2	80.979	396	1.42e-105	3656	Cucumis melo	muskmelon	Eukaryota
Contig1104	Cucumis melo genomic chromosome, chr_11	87.261	867	0	3656	Cucumis melo	muskmelon	Eukaryota
Contig1106	Cucumis melo genomic chromosome, chr_2	83.094	237	9.09e-58	3656	Cucumis melo	muskmelon	Eukaryota
Contig1107	Cucumis melo genomic chromosome, chr_4	90.141	274	6.93e-69	3656	Cucumis melo	muskmelon	Eukaryota
Contig1108	Cucumis melo genomic chromosome, chr_1	88.14	484	2.94e-132	3656	Cucumis melo	muskmelon	Eukaryota
Contig1109	Cucumis melo genomic chromosome, chr_2	90.709	531	3.72e-146	3656	Cucumis melo	muskmelon	Eukaryota
Contig1111	Cucumis melo genomic chromosome, chr_2	86.832	577	4.71e-160	3656	Cucumis melo	muskmelon	Eukaryota
Contig1113	Cucumis melo genomic chromosome, chr_6	91.016	344	5.19e-90	3656	Cucumis melo	muskmelon	Eukaryota
Contig1114	Cucumis melo genomic chromosome, chr_5	86.8	274	6.9e-69	3656	Cucumis melo	muskmelon	Eukaryota
Contig1115	Cucumis melo genomic chromosome, chr_1	87.984	568	2.83e-157	3656	Cucumis melo	muskmelon	Eukaryota
Contig1116	Cucumis melo genomic chromosome, chr_2	81.882	239	2.52e-58	3656	Cucumis melo	muskmelon	Eukaryota
Contig1117	Cucumis melo genomic chromosome, chr_12	81.222	628	1.28e-175	3656	Cucumis melo	muskmelon	Eukaryota
Contig1118	Cucumis melo genomic chromosome, chr_11	92.593	1120	0	3656	Cucumis melo	muskmelon	Eukaryota
Contig1119	Cucumis melo genomic chromosome, chr_2	92.771	479	1.36e-130	3656	Cucumis melo	muskmelon	Eukaryota
Contig1120	Cucumis melo genomic chromosome, chr_5	90.442	1251	0	3656	Cucumis melo	muskmelon	Eukaryota
Contig1121	Cucumis melo genomic chromosome, chr_11	80.986	536	7.94e-148	3656	Cucumis melo	muskmelon	Eukaryota
Contig1122	Cucumis melo genomic chromosome, chr_8	89.627	1988	0	3656	Cucumis melo	muskmelon	Eukaryota
Contig1124	Cucumis melo genomic chromosome, chr_3	83.784	200	1.18e-46	3656	Cucumis melo	muskmelon	Eukaryota
Contig1126	Cucumis melo genomic chromosome, chr_5	87.64	198	4.24e-46	3656	Cucumis melo	muskmelon	Eukaryota
Contig1129	Cucumis melo genomic chromosome, chr_9	84.875	643	4.53e-180	3656	Cucumis melo	muskmelon	Eukaryota
Contig1130	Cucumis melo genomic chromosome, chr_3	85.227	682	0	3656	Cucumis melo	muskmelon	Eukaryota
Contig1131	Cucumis melo genomic chromosome, chr_10	87.948	353	8.53e-93	3656	Cucumis melo	muskmelon	Eukaryota
Contig1132	Cucumis melo genomic chromosome, chr_11	77.199	457	6.32e-124	3656	Cucumis melo	muskmelon	Eukaryota
Contig1133	Cucumis melo genomic chromosome, chr_12	85.654	241	6.92e-59	3656	Cucumis melo	muskmelon	Eukaryota
Contig1134	Cucumis melo genomic chromosome, chr_1	81.507	575	1.67e-159	3656	Cucumis melo	muskmelon	Eukaryota
Contig1136	Cucumis melo genomic chromosome, chr_8	79.724	473	6.26e-129	3656	Cucumis melo	muskmelon	Eukaryota
Contig1137	Cucumis melo genomic chromosome, chr_4	83.107	547	3.64e-151	3656	Cucumis melo	muskmelon	Eukaryota
Contig1139	Cucumis melo genomic chromosome, chr_4	82.115	394	5e-105	3656	Cucumis melo	muskmelon	Eukaryota
Contig1141	Cucumis melo genomic chromosome, chr_10	79.899	414	3.84e-111	3656	Cucumis melo	muskmelon	Eukaryota
Contig1143	Cucumis melo genomic chromosome, chr_9	86.342	662	0	3656	Cucumis melo	muskmelon	Eukaryota
Contig1144	Cucumis melo genomic chromosome, chr_5	88.301	1356	0	3656	Cucumis melo	muskmelon	Eukaryota
Contig1146	Cucumis melo genomic chromosome, chr_9	90.526	974	0	3656	Cucumis melo	muskmelon	Eukaryota
Contig1147	Cucumis melo genomic chromosome, chr_1	83.918	422	2.29e-113	3656	Cucumis melo	muskmelon	Eukaryota
Contig1149	Cucumis melo genomic chromosome, chr_12	92.607	364	3.91e-96	3656	Cucumis melo	muskmelon	Eukaryota
Contig1150	Cucumis melo genomic chromosome, chr_4	79.522	363	1.4e-95	3656	Cucumis melo	muskmelon	Eukaryota
Contig1151	Cucumis melo genomic chromosome, chr_2	83.108	254	8.81e-63	3656	Cucumis melo	muskmelon	Eukaryota
Contig1152	Cucumis melo genomic chromosome, chr_1	84.949	396	1.38e-105	3656	Cucumis melo	muskmelon	Eukaryota
Contig1153	Cucumis melo genomic chromosome, chr_5	81.183	922	0	3656	Cucumis melo	muskmelon	Eukaryota
Contig1155	Cucumis melo genomic chromosome, chr_5	79.452	289	2.41e-73	3656	Cucumis melo	muskmelon	Eukaryota
Contig1156	Cucumis melo genomic chromosome, chr_11	90.995	281	4.04e-71	3656	Cucumis melo	muskmelon	Eukaryota
Contig1158	Cucumis melo genomic chromosome, chr_3	90.719	992	0	3656	Cucumis melo	muskmelon	Eukaryota
Contig1159	Cucumis melo genomic chromosome, chr_3	84.706	331	3.95e-86	3656	Cucumis melo	muskmelon	Eukaryota
Contig1160	Cucumis melo genomic chromosome, chr_2	90.625	375	1.8e-99	3656	Cucumis melo	muskmelon	Eukaryota
Contig1161	Cucumis melo genomic chromosome, chr_2	84.01	357	6.51e-94	3656	Cucumis melo	muskmelon	Eukaryota
Contig1163	Cucumis melo genomic chromosome, chr_7	72.271	291	6.69e-74	3656	Cucumis melo	muskmelon	Eukaryota
Contig1164	Cucumis melo genomic chromosome, chr_1	85.515	1170	0	3656	Cucumis melo	muskmelon	Eukaryota
Contig1166	Cucumis melo genomic chromosome, chr_11	81.667	287	8.65e-73	3656	Cucumis melo	muskmelon	Eukaryota
Contig1167	Cucumis melo genomic chromosome, chr_1	89.873	204	8.96e-48	3656	Cucumis melo	muskmelon	Eukaryota
Contig1168	Cucumis melo genomic chromosome, chr_8	86.4	130	1.54e-25	3656	Cucumis melo	muskmelon	Eukaryota
Contig1169	Cucumis melo genomic chromosome, chr_6	87.052	1371	0	3656	Cucumis melo	muskmelon	Eukaryota
Contig1170	Cucumis melo genomic chromosome, chr_8	85.379	368	3e-97	3656	Cucumis melo	muskmelon	Eukaryota
Contig1172	Cucumis melo genomic chromosome, chr_9	87.172	370	8.34e-98	3656	Cucumis melo	muskmelon	Eukaryota
Contig1173	Cucumis melo genomic scaffold, unanchored_scaffold00218	85.294	390	6.4e-104	3656	Cucumis melo	muskmelon	Eukaryota
Contig1175	Cucumis melo genomic chromosome, chr_5	89.744	145	5.49e-30	3656	Cucumis melo	muskmelon	Eukaryota
Contig1178	Cucumis melo genomic chromosome, chr_8	88.148	154	9.12e-33	3656	Cucumis melo	muskmelon	Eukaryota
Contig1179	Cucumis melo genomic chromosome, chr_4	87.156	468	2.87e-127	3656	Cucumis melo	muskmelon	Eukaryota
Contig1182	Cucumis melo genomic chromosome, chr_5	79.545	392	1.77e-104	3656	Cucumis melo	muskmelon	Eukaryota
Contig1183	Cucumis melo genomic chromosome, chr_12	87.838	420	8.12e-113	3656	Cucumis melo	muskmelon	Eukaryota
Contig1184	Cucumis melo genomic chromosome, chr_12	77.851	263	1.45e-65	3656	Cucumis melo	muskmelon	Eukaryota
Contig1185	Cucumis melo genomic chromosome, chr_2	84.071	388	2.29e-103	3656	Cucumis melo	muskmelon	Eukaryota
Contig1186	Cucumis melo genomic chromosome, chr_7	85.929	532	9.97e-147	3656	Cucumis melo	muskmelon	Eukaryota
Contig1187	Cucumis melo genomic chromosome, chr_4	86.501	398	3.79e-106	3656	Cucumis melo	muskmelon	Eukaryota
Contig1189	Cucumis melo genomic chromosome, chr_1	93.75	551	2.74e-152	3656	Cucumis melo	muskmelon	Eukaryota
Contig1191	Cucumis melo genomic chromosome, chr_7	80.952	126	1.97e-24	3656	Cucumis melo	muskmelon	Eukaryota
Contig1192	Cucumis melo genomic chromosome, chr_5	88.235	195	5.31e-45	3656	Cucumis melo	muskmelon	Eukaryota
Contig1193	Cucumis melo genomic chromosome, chr_10	84.709	303	8.46e-78	3656	Cucumis melo	muskmelon	Eukaryota
Contig1194	Cucumis melo genomic chromosome, chr_2	80.063	209	1.9e-49	3656	Cucumis melo	muskmelon	Eukaryota
Contig1195	Cucumis melo genomic chromosome, chr_9	87.385	488	2.17e-133	3656	Cucumis melo	muskmelon	Eukaryota
Contig1196	Cucumis melo genomic chromosome, chr_2	87.879	224	6.77e-54	3656	Cucumis melo	muskmelon	Eukaryota
Contig1197	Cucumis melo genomic chromosome, chr_3	85.027	187	8.88e-43	3656	Cucumis melo	muskmelon	Eukaryota
Contig1198	Cucumis melo genomic chromosome, chr_1	81.26	475	1.69e-129	3656	Cucumis melo	muskmelon	Eukaryota
Contig1199	Cucumis melo genomic chromosome, chr_3	93.038	459	1.7e-124	3656	Cucumis melo	muskmelon	Eukaryota
Contig1200	Cucumis melo genomic chromosome, chr_11	94.51	390	6.3e-104	3656	Cucumis melo	muskmelon	Eukaryota
Contig1201	Cucumis melo genomic chromosome, chr_7	82.184	424	6.21e-114	3656	Cucumis melo	muskmelon	Eukaryota
Contig1203	Cucumis melo genomic scaffold, unassembled_sequence33278	83.821	436	7.97e-118	3656	Cucumis melo	muskmelon	Eukaryota
Contig1204	Cucumis melo genomic chromosome, chr_8	87.205	327	5e-85	3656	Cucumis melo	muskmelon	Eukaryota
Contig1205	Cucumis melo genomic scaffold, unassembled_sequence43611	83.812	353	8.26e-93	3656	Cucumis melo	muskmelon	Eukaryota
Contig1208	Cucumis melo genomic chromosome, chr_5	92.364	944	0	3656	Cucumis melo	muskmelon	Eukaryota
Contig1210	Cucumis melo genomic chromosome, chr_11	84.04	1363	0	3656	Cucumis melo	muskmelon	Eukaryota
Contig1211	Cucumis melo genomic chromosome, chr_8	86.453	586	7.43e-163	3656	Cucumis melo	muskmelon	Eukaryota
Contig1214	Cucumis melo genomic chromosome, chr_4	86.466	287	8.42e-73	3656	Cucumis melo	muskmelon	Eukaryota
Contig1215	Cucumis melo genomic chromosome, chr_7	88.655	281	3.92e-71	3656	Cucumis melo	muskmelon	Eukaryota
Contig1216	PREDICTED: Cucumis melo F-box/FBD/LRR-repeat protein At1g78750-like (LOC103503216), mRNA	93.028	1524	0	3656	Cucumis melo	muskmelon	Eukaryota
Contig1219	Cucumis melo genomic chromosome, chr_2	82.063	185	3.16e-42	3656	Cucumis melo	muskmelon	Eukaryota
Contig1221	Cucumis melo genomic chromosome, chr_11	91.765	340	6.36e-89	3656	Cucumis melo	muskmelon	Eukaryota
Contig1222	Cucumis melo genomic chromosome, chr_11	78.148	148	4.14e-31	3656	Cucumis melo	muskmelon	Eukaryota
Contig1224	Cucumis melo genomic chromosome, chr_1	80.409	425	1.7e-114	3656	Cucumis melo	muskmelon	Eukaryota
Contig1227	Cucumis melo genomic chromosome, chr_3	87.727	505	2.13e-138	3656	Cucumis melo	muskmelon	Eukaryota
Contig1230	Cucumis melo genomic chromosome, chr_12	83.14	436	7.85e-118	3656	Cucumis melo	muskmelon	Eukaryota
Contig1231	Cucumis melo genomic chromosome, chr_2	84.114	444	4.69e-120	3656	Cucumis melo	muskmelon	Eukaryota
Contig1233	Cucumis melo genomic chromosome, chr_11	88.293	821	0	3656	Cucumis melo	muskmelon	Eukaryota
Contig1235	Cucumis melo genomic chromosome, chr_5	89.809	780	0	3656	Cucumis melo	muskmelon	Eukaryota
Contig1238	Cucumis melo genomic chromosome, chr_12	89.754	303	8.27e-78	3656	Cucumis melo	muskmelon	Eukaryota
Contig1240	Cucumis melo genomic chromosome, chr_12	89.399	678	0	3656	Cucumis melo	muskmelon	Eukaryota
Contig1241	Cucumis melo genomic chromosome, chr_6	80.292	274	6.48e-69	3656	Cucumis melo	muskmelon	Eukaryota
Contig1243	Cucumis melo genomic chromosome, chr_6	84.615	244	5.08e-60	3656	Cucumis melo	muskmelon	Eukaryota
Contig1244	Cucumis melo genomic chromosome, chr_9	91.549	580	3.41e-161	3656	Cucumis melo	muskmelon	Eukaryota
Contig1245	Cucumis melo genomic chromosome, chr_2	93.492	924	0	3656	Cucumis melo	muskmelon	Eukaryota
Contig1246	PREDICTED: Cucumis melo uncharacterized LOC107990875 (LOC107990875), ncRNA	84.429	682	0	3656	Cucumis melo	muskmelon	Eukaryota
Contig1250	Cucumis melo genomic chromosome, chr_12	91.85	1061	0	3656	Cucumis melo	muskmelon	Eukaryota
Contig1251	Cucumis melo genomic chromosome, chr_12	85.804	656	0	3656	Cucumis melo	muskmelon	Eukaryota
Contig1252	Cucumis melo genomic chromosome, chr_11	87.131	418	2.82e-112	3656	Cucumis melo	muskmelon	Eukaryota
Contig1253	Cucumis melo genomic chromosome, chr_10	88.65	379	1.33e-100	3656	Cucumis melo	muskmelon	Eukaryota
Contig1254	Cucumis melo genomic scaffold, unanchored_scaffold00234	79.528	178	5.21e-40	3656	Cucumis melo	muskmelon	Eukaryota
Contig1255	Cucumis melo genomic chromosome, chr_9	88.77	436	7.79e-118	3656	Cucumis melo	muskmelon	Eukaryota
Contig1257	Cucumis melo genomic chromosome, chr_1	88.18	743	0	3656	Cucumis melo	muskmelon	Eukaryota
Contig1258	Cucumis melo genomic chromosome, chr_1	83.988	309	1.77e-79	3656	Cucumis melo	muskmelon	Eukaryota
Contig1259	Cucumis melo genomic chromosome, chr_12	83.48	407	6.1e-109	3656	Cucumis melo	muskmelon	Eukaryota
Contig1261	Cucumis melo genomic chromosome, chr_1	79.233	254	8.39e-63	3656	Cucumis melo	muskmelon	Eukaryota
Contig1262	Cucumis melo genomic chromosome, chr_6	87.833	294	4.94e-75	3656	Cucumis melo	muskmelon	Eukaryota
Contig1263	Cucumis melo genomic chromosome, chr_6	85.127	313	1.36e-80	3656	Cucumis melo	muskmelon	Eukaryota
Contig1264	Cucumis melo genomic chromosome, chr_4	85.055	420	7.82e-113	3656	Cucumis melo	muskmelon	Eukaryota
Contig1265	Cucumis melo genomic chromosome, chr_1	88.063	1435	0	3656	Cucumis melo	muskmelon	Eukaryota
Contig1267	Cucumis melo genomic chromosome, chr_11	95.538	604	2.01e-168	3656	Cucumis melo	muskmelon	Eukaryota
Contig1269	Cucumis melo genomic chromosome, chr_7	83.974	137	8.79e-28	3656	Cucumis melo	muskmelon	Eukaryota
Contig1271	Cucumis melo genomic chromosome, chr_7	82.258	252	3.01e-62	3656	Cucumis melo	muskmelon	Eukaryota
Contig1272	Cucumis melo genomic chromosome, chr_1	94.068	178	5.18e-40	3656	Cucumis melo	muskmelon	Eukaryota
Contig1273	Cucumis melo genomic chromosome, chr_3	83.193	207	6.6e-49	3656	Cucumis melo	muskmelon	Eukaryota
Contig1274	Cucumis melo genomic chromosome, chr_1	81.994	569	7.3e-158	3656	Cucumis melo	muskmelon	Eukaryota
Contig1275	Cucumis melo genomic scaffold, unassembled_sequence31644	86.364	196	1.43e-45	3656	Cucumis melo	muskmelon	Eukaryota
Contig1276	Cucumis melo genomic scaffold, unassembled_sequence37225	92.339	350	1.04e-91	3656	Cucumis melo	muskmelon	Eukaryota
Contig1277	Cucumis melo genomic chromosome, chr_4	82.769	555	2.04e-153	3656	Cucumis melo	muskmelon	Eukaryota
Contig1278	Cucumis melo genomic chromosome, chr_12	85.119	322	2.26e-83	3656	Cucumis melo	muskmelon	Eukaryota
Contig1279	Cucumis melo genomic chromosome, chr_1	95.238	728	0	3656	Cucumis melo	muskmelon	Eukaryota
Contig1280	Cucumis melo genomic chromosome, chr_11	100	117	1.14e-21	3656	Cucumis melo	muskmelon	Eukaryota
Contig1281	Cucumis melo genomic chromosome, chr_9	82.974	350	1.03e-91	3656	Cucumis melo	muskmelon	Eukaryota
Contig1282	Cucumis melo genomic chromosome, chr_5	83.155	316	1.05e-81	3656	Cucumis melo	muskmelon	Eukaryota
Contig1284	Cucumis melo genomic chromosome, chr_9	95.516	2344	0	3656	Cucumis melo	muskmelon	Eukaryota
Contig1286	Cucumis melo genomic chromosome, chr_4	85.621	303	8.15e-78	3656	Cucumis melo	muskmelon	Eukaryota
Contig1288	Cucumis melo genomic chromosome, chr_9	91.878	268	2.97e-67	3656	Cucumis melo	muskmelon	Eukaryota
Contig1289	Cucumis melo genomic chromosome, chr_2	88.182	126	1.89e-24	3656	Cucumis melo	muskmelon	Eukaryota
Contig1290	Cucumis melo genomic chromosome, chr_8	86.443	726	0	3656	Cucumis melo	muskmelon	Eukaryota
Contig1292	Cucumis melo genomic chromosome, chr_1	87.043	333	1.04e-86	3656	Cucumis melo	muskmelon	Eukaryota
Contig1293	Cucumis melo genomic chromosome, chr_12	84.028	132	4.06e-26	3656	Cucumis melo	muskmelon	Eukaryota
Contig1294	Cucumis melo genomic chromosome, chr_2	85.283	257	6.41e-64	3656	Cucumis melo	muskmelon	Eukaryota
Contig1295	Cucumis melo genomic chromosome, chr_4	81.227	219	3.03e-52	3656	Cucumis melo	muskmelon	Eukaryota
Contig1297	Cucumis melo genomic scaffold, unassembled_sequence32291	85.783	850	0	3656	Cucumis melo	muskmelon	Eukaryota
Contig1300	Cucumis melo genomic chromosome, chr_2	83.642	291	6.31e-74	3656	Cucumis melo	muskmelon	Eukaryota
Contig1302	Cucumis melo genomic chromosome, chr_5	78.243	549	9.42e-152	3656	Cucumis melo	muskmelon	Eukaryota
Contig1303	Cucumis melo genomic chromosome, chr_11	84.848	219	3.02e-52	3656	Cucumis melo	muskmelon	Eukaryota
Contig1304	Cucumis melo genomic scaffold, unassembled_sequence30977	94.4	191	6.57e-44	3656	Cucumis melo	muskmelon	Eukaryota
Contig1305	Cucumis melo genomic chromosome, chr_2	93.145	359	1.7e-94	3656	Cucumis melo	muskmelon	Eukaryota
Contig1306	Cucumis melo genomic chromosome, chr_1	94.796	418	2.76e-112	3656	Cucumis melo	muskmelon	Eukaryota
Contig1307	Cucumis melo genomic chromosome, chr_8	83.851	150	1.11e-31	3656	Cucumis melo	muskmelon	Eukaryota
Contig1308	Cucumis melo genomic chromosome, chr_5	88.186	274	6.33e-69	3656	Cucumis melo	muskmelon	Eukaryota
Contig1309	Cucumis melo genomic chromosome, chr_2	85.088	331	3.7e-86	3656	Cucumis melo	muskmelon	Eukaryota
Contig1310	Cucumis melo genomic chromosome, chr_1	82.821	316	1.04e-81	3656	Cucumis melo	muskmelon	Eukaryota
Contig1311	Cucumis melo genomic chromosome, chr_6	91.791	182	3.95e-41	3656	Cucumis melo	muskmelon	Eukaryota
Contig1312	Cucumis melo genomic chromosome, chr_10	95.223	494	4.46e-135	3656	Cucumis melo	muskmelon	Eukaryota
Contig1314	Cucumis melo genomic chromosome, chr_4	92.014	398	3.6e-106	3656	Cucumis melo	muskmelon	Eukaryota
Contig1315	Cucumis melo genomic chromosome, chr_12	87.665	780	0	3656	Cucumis melo	muskmelon	Eukaryota
Contig1316	Cucumis melo genomic chromosome, chr_11	78.669	357	6.1e-94	3656	Cucumis melo	muskmelon	Eukaryota
Contig1317	Cucumis melo genomic chromosome, chr_1	81.237	704	0	3656	Cucumis melo	muskmelon	Eukaryota
Contig1319	Cucumis melo genomic chromosome, chr_8	92.216	1622	0	3656	Cucumis melo	muskmelon	Eukaryota
Contig1320	Cucumis melo genomic chromosome, chr_10	92.958	309	1.73e-79	3656	Cucumis melo	muskmelon	Eukaryota
Contig1321	Cucumis melo genomic chromosome, chr_9	88.146	767	0	3656	Cucumis melo	muskmelon	Eukaryota
Contig1322	Cucumis melo genomic chromosome, chr_1	83.7	209	1.81e-49	3656	Cucumis melo	muskmelon	Eukaryota
Contig1323	Cucumis melo genomic chromosome, chr_4	79.042	191	6.54e-44	3656	Cucumis melo	muskmelon	Eukaryota
Contig1324	Cucumis melo genomic chromosome, chr_6	83.951	424	5.92e-114	3656	Cucumis melo	muskmelon	Eukaryota
Contig1325	Cucumis melo genomic chromosome, chr_7	91.053	252	2.95e-62	3656	Cucumis melo	muskmelon	Eukaryota
Contig1326	Cucumis melo genomic chromosome, chr_3	75.979	335	2.85e-87	3656	Cucumis melo	muskmelon	Eukaryota
Contig1327	Cucumis melo genomic chromosome, chr_4	83.676	717	0	3656	Cucumis melo	muskmelon	Eukaryota
Contig1330	Cucumis melo genomic chromosome, chr_9	84.054	355	2.19e-93	3656	Cucumis melo	muskmelon	Eukaryota
Contig1331	Cucumis melo genomic chromosome, chr_3	84.867	1260	0	3656	Cucumis melo	muskmelon	Eukaryota
Contig1333	Cucumis melo genomic chromosome, chr_11	83.507	484	2.67e-132	3656	Cucumis melo	muskmelon	Eukaryota
Contig1335	Cucumis melo genomic chromosome, chr_12	79.012	532	9.4e-147	3656	Cucumis melo	muskmelon	Eukaryota
Contig1338	Cucumis melo genomic chromosome, chr_4	90.988	1214	0	3656	Cucumis melo	muskmelon	Eukaryota
Contig1339	Cucumis melo genomic chromosome, chr_7	90.759	1905	0	3656	Cucumis melo	muskmelon	Eukaryota
Contig1340	Cucumis melo genomic chromosome, chr_8	87.298	549	9.31e-152	3656	Cucumis melo	muskmelon	Eukaryota
Contig1341	Cucumis melo genomic chromosome, chr_8	78.788	359	1.68e-94	3656	Cucumis melo	muskmelon	Eukaryota
Contig1342	Cucumis melo genomic chromosome, chr_5	76.052	322	2.21e-83	3656	Cucumis melo	muskmelon	Eukaryota
Contig1344	Cucumis melo genomic chromosome, chr_6	88.189	289	2.24e-73	3656	Cucumis melo	muskmelon	Eukaryota
Contig1347	Cucumis melo genomic chromosome, chr_8	85.202	219	2.98e-52	3656	Cucumis melo	muskmelon	Eukaryota
Contig1348	Cucumis melo genomic scaffold, unassembled_sequence34518	87.153	315	3.69e-81	3656	Cucumis melo	muskmelon	Eukaryota
Contig1350	Cucumis melo genomic chromosome, chr_2	88.438	1365	0	3656	Cucumis melo	muskmelon	Eukaryota
Contig1352	Cucumis melo genomic scaffold, unanchored_scaffold00203	83.65	219	2.97e-52	3656	Cucumis melo	muskmelon	Eukaryota
Contig1354	Cucumis melo genomic chromosome, chr_4	81.529	340	6.08e-89	3656	Cucumis melo	muskmelon	Eukaryota
Contig1356	Cucumis melo genomic chromosome, chr_1	80.227	784	0	3656	Cucumis melo	muskmelon	Eukaryota
Contig1361	Cucumis melo genomic scaffold, unanchored_scaffold00653	84.217	769	0	3656	Cucumis melo	muskmelon	Eukaryota
Contig1362	Cucumis melo genomic chromosome, chr_9	87.591	302	2.86e-77	3656	Cucumis melo	muskmelon	Eukaryota
Contig1363	Cucumis melo genomic chromosome, chr_11	80.051	279	1.34e-70	3656	Cucumis melo	muskmelon	Eukaryota
Contig1364	Cucumis melo genomic chromosome, chr_7	82.927	305	2.21e-78	3656	Cucumis melo	muskmelon	Eukaryota
Contig1368	Cucumis melo genomic chromosome, chr_5	80.793	466	9.57e-127	3656	Cucumis melo	muskmelon	Eukaryota
Contig1369	Cucumis melo genomic chromosome, chr_12	93.594	1253	0	3656	Cucumis melo	muskmelon	Eukaryota
Contig1370	Cucumis melo genomic chromosome, chr_4	90.625	466	9.57e-127	3656	Cucumis melo	muskmelon	Eukaryota
Contig1372	Cucumis melo genomic chromosome, chr_6	90.033	374	5.95e-99	3656	Cucumis melo	muskmelon	Eukaryota
Contig1373	Cucumis melo genomic chromosome, chr_1	91.945	704	0	3656	Cucumis melo	muskmelon	Eukaryota
Contig1374	Cucumis melo genomic chromosome, chr_1	78.934	231	3.79e-56	3656	Cucumis melo	muskmelon	Eukaryota
Contig1375	PREDICTED: Cucumis melo autophagy-related protein 3 (LOC103494478), transcript variant X3, mRNA	89.024	202	2.97e-47	3656	Cucumis melo	muskmelon	Eukaryota
Contig1376	Cucumis melo genomic chromosome, chr_6	83.829	464	3.43e-126	3656	Cucumis melo	muskmelon	Eukaryota
Contig1378	Cucumis melo genomic chromosome, chr_8	79.556	154	8.43e-33	3656	Cucumis melo	muskmelon	Eukaryota
Contig1379	Cucumis melo genomic chromosome, chr_5	85.714	477	4.4e-130	3656	Cucumis melo	muskmelon	Eukaryota
Contig1380	Cucumis melo genomic chromosome, chr_10	88.835	248	3.75e-61	3656	Cucumis melo	muskmelon	Eukaryota
Contig1383	Cucumis melo genomic chromosome, chr_1	92.483	625	1.48e-174	3656	Cucumis melo	muskmelon	Eukaryota
Contig1384	Cucumis melo genomic chromosome, chr_5	85.211	411	4.52e-110	3656	Cucumis melo	muskmelon	Eukaryota
Contig1385	Cucumis melo genomic scaffold, unanchored_scaffold00584	81.529	124	6.59e-24	3656	Cucumis melo	muskmelon	Eukaryota
Contig1386	Cucumis melo genomic chromosome, chr_4	83.363	501	2.6e-137	3656	Cucumis melo	muskmelon	Eukaryota
Contig1387	Cucumis melo genomic chromosome, chr_4	91.824	433	9.62e-117	3656	Cucumis melo	muskmelon	Eukaryota
Contig1389	Cucumis melo genomic chromosome, chr_12	85.61	411	4.51e-110	3656	Cucumis melo	muskmelon	Eukaryota
Contig1390	Cucumis melo genomic chromosome, chr_4	83.596	272	2.22e-68	3656	Cucumis melo	muskmelon	Eukaryota
Contig1391	Cucumis melo genomic chromosome, chr_12	85.185	281	3.69e-71	3656	Cucumis melo	muskmelon	Eukaryota
Contig1393	Cucumis melo genomic chromosome, chr_2	80.066	593	4.17e-165	3656	Cucumis melo	muskmelon	Eukaryota
Contig1394	Cucumis melo genomic chromosome, chr_6	84.694	267	1.03e-66	3656	Cucumis melo	muskmelon	Eukaryota
Contig1395	Cucumis melo genomic chromosome, chr_4	84.615	180	1.38e-40	3656	Cucumis melo	muskmelon	Eukaryota
Contig1397	Cucumis melo genomic chromosome, chr_8	76.471	148	3.89e-31	3656	Cucumis melo	muskmelon	Eukaryota
Contig1398	Cucumis melo genomic chromosome, chr_12	79.595	409	1.62e-109	3656	Cucumis melo	muskmelon	Eukaryota
Contig1399	Cucumis melo genomic chromosome, chr_9	87.52	1387	0	3656	Cucumis melo	muskmelon	Eukaryota
Contig1400	Cucumis melo genomic chromosome, chr_12	77.437	200	1.06e-46	3656	Cucumis melo	muskmelon	Eukaryota
Contig1401	Cucumis melo genomic chromosome, chr_9	92.792	1092	0	3656	Cucumis melo	muskmelon	Eukaryota
Contig1402	Cucumis melo genomic chromosome, chr_11	82.627	612	1.15e-170	3656	Cucumis melo	muskmelon	Eukaryota
Contig1404	Cucumis melo genomic chromosome, chr_6	79.523	326	1.67e-84	3656	Cucumis melo	muskmelon	Eukaryota
Contig1406	Cucumis melo genomic chromosome, chr_6	77.907	191	6.36e-44	3656	Cucumis melo	muskmelon	Eukaryota
Contig1407	Cucumis melo genomic chromosome, chr_5	85.443	307	6.06e-79	3656	Cucumis melo	muskmelon	Eukaryota
Contig1408	Cucumis melo genomic scaffold, unanchored_scaffold00504	79.474	464	3.39e-126	3656	Cucumis melo	muskmelon	Eukaryota
Contig1409	Cucumis melo genomic chromosome, chr_4	89.106	846	0	3656	Cucumis melo	muskmelon	Eukaryota
Contig1410	Cucumis melo genomic chromosome, chr_1	84.615	254	7.99e-63	3656	Cucumis melo	muskmelon	Eukaryota
Contig1411	Cucumis melo genomic chromosome, chr_7	84.507	326	1.67e-84	3656	Cucumis melo	muskmelon	Eukaryota
Contig1412	Cucumis melo genomic chromosome, chr_9	89.27	281	3.66e-71	3656	Cucumis melo	muskmelon	Eukaryota
Contig1413	Cucumis melo genomic chromosome, chr_11	90.353	553	7.03e-153	3656	Cucumis melo	muskmelon	Eukaryota
Contig1414	Cucumis melo genomic chromosome, chr_8	84.955	883	0	3656	Cucumis melo	muskmelon	Eukaryota
Contig1416	Cucumis melo genomic chromosome, chr_9	80.829	134	1.08e-26	3656	Cucumis melo	muskmelon	Eukaryota
Contig1417	Cucumis melo genomic chromosome, chr_9	89.503	224	6.25e-54	3656	Cucumis melo	muskmelon	Eukaryota
Contig1418	Cucumis melo genomic chromosome, chr_1	81.02	1033	0	3656	Cucumis melo	muskmelon	Eukaryota
Contig1419	Cucumis melo genomic chromosome, chr_9	76.613	444	4.41e-120	3656	Cucumis melo	muskmelon	Eukaryota
Contig1421	Cucumis melo genomic chromosome, chr_5	79.091	459	1.57e-124	3656	Cucumis melo	muskmelon	Eukaryota
Contig1423	Cucumis melo genomic chromosome, chr_6	95.349	137	8.37e-28	3656	Cucumis melo	muskmelon	Eukaryota
Contig1424	Cucumis melo genomic chromosome, chr_12	87.531	464	3.38e-126	3656	Cucumis melo	muskmelon	Eukaryota
Contig1425	Cucumis melo genomic chromosome, chr_4	82.722	547	3.26e-151	3656	Cucumis melo	muskmelon	Eukaryota
Contig1426	Cucumis melo genomic chromosome, chr_9	75.255	326	1.66e-84	3656	Cucumis melo	muskmelon	Eukaryota
Contig1427	Cucumis melo genomic chromosome, chr_12	90.749	302	2.8e-77	3656	Cucumis melo	muskmelon	Eukaryota
Contig1428	Cucumis melo genomic chromosome, chr_12	80	182	3.81e-41	3656	Cucumis melo	muskmelon	Eukaryota
Contig1429	Cucumis melo genomic chromosome, chr_11	89.689	756	0	3656	Cucumis melo	muskmelon	Eukaryota
Contig1430	Cucumis melo genomic chromosome, chr_6	88	464	3.38e-126	3656	Cucumis melo	muskmelon	Eukaryota
Contig1431	Cucumis melo genomic chromosome, chr_10	81.924	263	1.32e-65	3656	Cucumis melo	muskmelon	Eukaryota
Contig1432	Cucumis melo genomic chromosome, chr_10	83.16	436	7.35e-118	3656	Cucumis melo	muskmelon	Eukaryota
Contig1433	Cucumis melo genomic chromosome, chr_3	78.801	479	1.2e-130	3656	Cucumis melo	muskmelon	Eukaryota
Contig1434	Cucumis melo genomic chromosome, chr_3	79.556	545	1.17e-150	3656	Cucumis melo	muskmelon	Eukaryota
Contig1436	Cucumis melo genomic chromosome, chr_5	81.509	616	8.79e-172	3656	Cucumis melo	muskmelon	Eukaryota
Contig1437	Cucumis melo genomic chromosome, chr_4	85.98	603	6.84e-168	3656	Cucumis melo	muskmelon	Eukaryota
Contig1438	Cucumis melo genomic chromosome, chr_12	87.209	291	6.04e-74	3656	Cucumis melo	muskmelon	Eukaryota
Contig1440	Cucumis melo genomic chromosome, chr_6	94.253	261	4.74e-65	3656	Cucumis melo	muskmelon	Eukaryota
Contig1441	Cucumis melo genomic chromosome, chr_7	93.474	835	0	3656	Cucumis melo	muskmelon	Eukaryota
Contig1442	Cucumis melo genomic chromosome, chr_5	94.615	198	3.76e-46	3656	Cucumis melo	muskmelon	Eukaryota
Contig1444	Cucumis melo genomic chromosome, chr_9	93.252	239	2.21e-58	3656	Cucumis melo	muskmelon	Eukaryota
Contig1445	Cucumis melo genomic chromosome, chr_5	93.418	1375	0	3656	Cucumis melo	muskmelon	Eukaryota
Contig1446	Cucumis melo genomic chromosome, chr_8	87.016	1107	0	3656	Cucumis melo	muskmelon	Eukaryota
Contig1447	Cucumis melo genomic chromosome, chr_2	79.699	172	2.27e-38	3656	Cucumis melo	muskmelon	Eukaryota
Contig1449	Cucumis melo genomic chromosome, chr_11	94.481	473	5.56e-129	3656	Cucumis melo	muskmelon	Eukaryota
Contig1450	Cucumis melo genomic chromosome, chr_3	89.164	388	2.07e-103	3656	Cucumis melo	muskmelon	Eukaryota
Contig1452	Cucumis melo genomic chromosome, chr_12	83.968	905	0	3656	Cucumis melo	muskmelon	Eukaryota
Contig1453	Cucumis melo genomic chromosome, chr_8	79.505	298	3.59e-76	3656	Cucumis melo	muskmelon	Eukaryota
Contig1455	Cucumis melo genomic chromosome, chr_3	86.997	353	7.55e-93	3656	Cucumis melo	muskmelon	Eukaryota
Contig1456	Cucumis melo genomic chromosome, chr_12	84.266	512	1.18e-140	3656	Cucumis melo	muskmelon	Eukaryota
Contig1457	Cucumis melo genomic chromosome, chr_4	77.273	375	1.61e-99	3656	Cucumis melo	muskmelon	Eukaryota
Contig1458	Cucumis melo genomic chromosome, chr_2	82.906	285	2.79e-72	3656	Cucumis melo	muskmelon	Eukaryota
Contig1459	Cucumis melo genomic chromosome, chr_4	82.754	597	3.16e-166	3656	Cucumis melo	muskmelon	Eukaryota
Contig1460	Cucumis melo genomic chromosome, chr_11	85.372	385	2.67e-102	3656	Cucumis melo	muskmelon	Eukaryota
Contig1461	PREDICTED: Cucumis melo uncharacterized LOC103496754 (LOC103496754), transcript variant X2, ncRNA	73.921	167	1.05e-36	3656	Cucumis melo	muskmelon	Eukaryota
Contig1462	Cucumis melo genomic chromosome, chr_7	91	134	1.07e-26	3656	Cucumis melo	muskmelon	Eukaryota
Contig1464	Cucumis melo genomic chromosome, chr_10	90.909	291	5.99e-74	3656	Cucumis melo	muskmelon	Eukaryota
Contig1465	Cucumis melo genomic chromosome, chr_12	84.407	272	2.17e-68	3656	Cucumis melo	muskmelon	Eukaryota
Contig1467	Cucumis melo genomic chromosome, chr_11	87.327	468	2.58e-127	3656	Cucumis melo	muskmelon	Eukaryota
Contig1468	Cucumis melo genomic chromosome, chr_6	80.753	172	2.26e-38	3656	Cucumis melo	muskmelon	Eukaryota
Contig1469	Cucumis melo genomic chromosome, chr_7	84.314	383	9.6e-102	3656	Cucumis melo	muskmelon	Eukaryota
Contig1470	Cucumis melo genomic chromosome, chr_2	85.973	226	1.71e-54	3656	Cucumis melo	muskmelon	Eukaryota
Contig1471	Cucumis melo genomic chromosome, chr_9	81.414	394	4.43e-105	3656	Cucumis melo	muskmelon	Eukaryota
Contig1473	Cucumis melo genomic chromosome, chr_8	76.736	147	1.37e-30	3656	Cucumis melo	muskmelon	Eukaryota
Contig1474	Cucumis melo genomic chromosome, chr_1	83.807	331	3.52e-86	3656	Cucumis melo	muskmelon	Eukaryota
Contig1475	Cucumis melo genomic chromosome, chr_10	79.201	368	2.68e-97	3656	Cucumis melo	muskmelon	Eukaryota
Contig1476	Cucumis melo genomic chromosome, chr_5	80.725	665	0	3656	Cucumis melo	muskmelon	Eukaryota
Contig1477	Cucumis melo genomic chromosome, chr_8	92.67	274	6.02e-69	3656	Cucumis melo	muskmelon	Eukaryota
Contig1478	Cucumis melo genomic chromosome, chr_8	84.211	477	4.27e-130	3656	Cucumis melo	muskmelon	Eukaryota
Contig1480	Cucumis melo genomic chromosome, chr_1	75.777	435	2.61e-117	3656	Cucumis melo	muskmelon	Eukaryota
Contig1481	Cucumis melo genomic chromosome, chr_2	84.447	773	0	3656	Cucumis melo	muskmelon	Eukaryota
Contig1482	Cucumis melo genomic chromosome, chr_10	78.125	141	6.36e-29	3656	Cucumis melo	muskmelon	Eukaryota
Contig1483	Cucumis melo genomic chromosome, chr_11	77.13	121	8.28e-23	3656	Cucumis melo	muskmelon	Eukaryota
Contig1484	Cucumis melo genomic chromosome, chr_12	79.134	599	8.71e-167	3656	Cucumis melo	muskmelon	Eukaryota
Contig1485	Cucumis melo genomic chromosome, chr_12	83.9	484	2.55e-132	3656	Cucumis melo	muskmelon	Eukaryota
Contig1486	Cucumis melo genomic chromosome, chr_4	87.733	412	1.22e-110	3656	Cucumis melo	muskmelon	Eukaryota
Contig1487	Cucumis melo genomic chromosome, chr_9	79.837	311	4.57e-80	3656	Cucumis melo	muskmelon	Eukaryota
Contig1488	Cucumis melo genomic chromosome, chr_1	83.844	335	2.71e-87	3656	Cucumis melo	muskmelon	Eukaryota
Contig1490	Cucumis melo genomic chromosome, chr_8	86.696	497	3.26e-136	3656	Cucumis melo	muskmelon	Eukaryota
Contig1491	Cucumis melo genomic chromosome, chr_8	81.348	486	7.06e-133	3656	Cucumis melo	muskmelon	Eukaryota
Contig1493	Cucumis melo genomic chromosome, chr_6	81.229	436	7.21e-118	3656	Cucumis melo	muskmelon	Eukaryota
Contig1494	Cucumis melo genomic chromosome, chr_2	84.724	606	5.2e-169	3656	Cucumis melo	muskmelon	Eukaryota
Contig1495	Cucumis melo genomic chromosome, chr_1	93.982	852	0	3656	Cucumis melo	muskmelon	Eukaryota
Contig1496	Cucumis melo genomic chromosome, chr_4	79.043	484	2.54e-132	3656	Cucumis melo	muskmelon	Eukaryota
Contig1497	Cucumis melo genomic chromosome, chr_1	92.76	315	3.53e-81	3656	Cucumis melo	muskmelon	Eukaryota
Contig1499	Cucumis melo genomic chromosome, chr_1	87.143	455	1.99e-123	3656	Cucumis melo	muskmelon	Eukaryota
Contig1500	Cucumis melo genomic chromosome, chr_5	81.678	704	0	3656	Cucumis melo	muskmelon	Eukaryota
Contig1502	Cucumis melo genomic chromosome, chr_5	83.254	348	3.47e-91	3656	Cucumis melo	muskmelon	Eukaryota
Contig1503	Cucumis melo genomic chromosome, chr_2	90.798	431	3.35e-116	3656	Cucumis melo	muskmelon	Eukaryota
Contig1504	Cucumis melo genomic chromosome, chr_6	87.791	1181	0	3656	Cucumis melo	muskmelon	Eukaryota
Contig1505	Cucumis melo genomic chromosome, chr_4	89.776	390	5.68e-104	3656	Cucumis melo	muskmelon	Eukaryota
Contig1506	Cucumis melo genomic chromosome, chr_2	85.019	503	6.99e-138	3656	Cucumis melo	muskmelon	Eukaryota
Contig1508	Cucumis melo genomic chromosome, chr_4	85.178	1029	0	3656	Cucumis melo	muskmelon	Eukaryota
Contig1509	Cucumis melo genomic chromosome, chr_5	94.624	145	4.88e-30	3656	Cucumis melo	muskmelon	Eukaryota
Contig1511	Cucumis melo genomic scaffold, unanchored_scaffold00427	85.938	948	0	3656	Cucumis melo	muskmelon	Eukaryota
Contig1512	Cucumis melo genomic chromosome, chr_8	87.335	573	5.25e-159	3656	Cucumis melo	muskmelon	Eukaryota
Contig1514	Cucumis melo genomic chromosome, chr_8	85.978	270	7.71e-68	3656	Cucumis melo	muskmelon	Eukaryota
Contig1516	Cucumis melo genomic chromosome, chr_1	92.994	226	1.69e-54	3656	Cucumis melo	muskmelon	Eukaryota
Contig1517	Cucumis melo genomic chromosome, chr_4	90.152	340	5.78e-89	3656	Cucumis melo	muskmelon	Eukaryota
Contig1518	Cucumis melo genomic chromosome, chr_5	79.048	479	1.17e-130	3656	Cucumis melo	muskmelon	Eukaryota
Contig1519	Cucumis melo genomic chromosome, chr_4	83.992	486	7.01e-133	3656	Cucumis melo	muskmelon	Eukaryota
Contig1520	Cucumis melo genomic chromosome, chr_6	81.925	412	1.21e-110	3656	Cucumis melo	muskmelon	Eukaryota
Contig1522	Cucumis melo genomic chromosome, chr_4	87.156	725	0	3656	Cucumis melo	muskmelon	Eukaryota
Contig1523	Cucumis melo genomic chromosome, chr_12	79.75	540	5.3e-149	3656	Cucumis melo	muskmelon	Eukaryota
Contig1524	Cucumis melo genomic chromosome, chr_10	93.452	244	4.65e-60	3656	Cucumis melo	muskmelon	Eukaryota
Contig1525	Cucumis melo genomic chromosome, chr_12	82.75	337	7.46e-88	3656	Cucumis melo	muskmelon	Eukaryota
Contig1529	Cucumis melo genomic chromosome, chr_3	88.619	776	0	3656	Cucumis melo	muskmelon	Eukaryota
Contig1530	Cucumis melo genomic chromosome, chr_8	81.34	331	3.47e-86	3656	Cucumis melo	muskmelon	Eukaryota
Contig1531	Cucumis melo genomic chromosome, chr_1	85.256	606	5.14e-169	3656	Cucumis melo	muskmelon	Eukaryota
Contig1533	Cucumis melo genomic chromosome, chr_8	86.486	730	0	3656	Cucumis melo	muskmelon	Eukaryota
Contig1535	Cucumis melo genomic scaffold, unanchored_scaffold00124	76.772	387	7.29e-103	3656	Cucumis melo	muskmelon	Eukaryota
Contig1536	Cucumis melo genomic chromosome, chr_1	85.106	189	2.21e-43	3656	Cucumis melo	muskmelon	Eukaryota
Contig1537	Cucumis melo genomic chromosome, chr_4	88.247	1186	0	3656	Cucumis melo	muskmelon	Eukaryota
Contig1538	Cucumis melo genomic chromosome, chr_6	85.77	1299	0	3656	Cucumis melo	muskmelon	Eukaryota
Contig1539	Cucumis melo genomic chromosome, chr_2	84.235	390	5.62e-104	3656	Cucumis melo	muskmelon	Eukaryota
Contig1541	Cucumis melo genomic chromosome, chr_11	91.13	773	0	3656	Cucumis melo	muskmelon	Eukaryota
Contig1542	Cucumis melo genomic chromosome, chr_1	89.617	230	1.3e-55	3656	Cucumis melo	muskmelon	Eukaryota
Contig1543	Cucumis melo genomic chromosome, chr_2	92.017	331	3.45e-86	3656	Cucumis melo	muskmelon	Eukaryota
Contig1545	Cucumis melo genomic chromosome, chr_10	85.215	363	1.22e-95	3656	Cucumis melo	muskmelon	Eukaryota
Contig1546	Cucumis melo genomic chromosome, chr_3	84.8	477	4.19e-130	3656	Cucumis melo	muskmelon	Eukaryota
Contig1548	Cucumis melo genomic chromosome, chr_3	80.818	206	2.18e-48	3656	Cucumis melo	muskmelon	Eukaryota
Contig1549	Cucumis melo genomic chromosome, chr_9	90	228	4.66e-55	3656	Cucumis melo	muskmelon	Eukaryota
Contig1550	Cucumis melo genomic chromosome, chr_7	88.991	126	1.75e-24	3656	Cucumis melo	muskmelon	Eukaryota
Contig1551	Cucumis melo genomic chromosome, chr_10	86.174	1450	0	3656	Cucumis melo	muskmelon	Eukaryota
Contig1552	Cucumis melo genomic chromosome, chr_3	88.276	172	2.21e-38	3656	Cucumis melo	muskmelon	Eukaryota
Contig1554	Cucumis melo genomic chromosome, chr_2	90.141	355	2.05e-93	3656	Cucumis melo	muskmelon	Eukaryota
Contig1555	Cucumis melo genomic chromosome, chr_1	89.876	1212	0	3656	Cucumis melo	muskmelon	Eukaryota
Contig1556	Cucumis melo genomic chromosome, chr_4	92.784	141	6.23e-29	3656	Cucumis melo	muskmelon	Eukaryota
Contig1557	Cucumis melo genomic chromosome, chr_1	85.352	503	6.9e-138	3656	Cucumis melo	muskmelon	Eukaryota
Contig1558	Cucumis melo genomic chromosome, chr_1	80.307	291	5.85e-74	3656	Cucumis melo	muskmelon	Eukaryota
Contig1561	Cucumis melo genomic chromosome, chr_1	91.985	361	4.38e-95	3656	Cucumis melo	muskmelon	Eukaryota
Contig1563	Cucumis melo genomic chromosome, chr_11	89.463	616	8.47e-172	3656	Cucumis melo	muskmelon	Eukaryota
Contig1564	Cucumis melo genomic chromosome, chr_1	89.904	531	3.15e-146	3656	Cucumis melo	muskmelon	Eukaryota
Contig1565	Cucumis melo genomic chromosome, chr_6	79.054	283	9.75e-72	3656	Cucumis melo	muskmelon	Eukaryota
Contig1566	Cucumis melo genomic chromosome, chr_1	86.943	335	2.65e-87	3656	Cucumis melo	muskmelon	Eukaryota
Contig1568	Cucumis melo genomic chromosome, chr_5	92.551	1386	0	3656	Cucumis melo	muskmelon	Eukaryota
Contig1569	Cucumis melo genomic chromosome, chr_2	86.56	468	2.51e-127	3656	Cucumis melo	muskmelon	Eukaryota
Contig1571	Cucumis melo genomic chromosome, chr_1	90.054	697	0	3656	Cucumis melo	muskmelon	Eukaryota
Contig1572	Cucumis melo genomic chromosome, chr_3	81.758	671	0	3656	Cucumis melo	muskmelon	Eukaryota
Contig1574	Cucumis melo genomic chromosome, chr_1	81.227	206	2.17e-48	3656	Cucumis melo	muskmelon	Eukaryota
Contig1576	Cucumis melo genomic chromosome, chr_6	96.309	488	1.92e-133	3656	Cucumis melo	muskmelon	Eukaryota
Contig1578	Cucumis melo genomic chromosome, chr_11	87.173	473	5.38e-129	3656	Cucumis melo	muskmelon	Eukaryota
Contig1579	Cucumis melo genomic chromosome, chr_3	83.427	311	4.46e-80	3656	Cucumis melo	muskmelon	Eukaryota
Contig1581	Cucumis melo genomic chromosome, chr_10	91.212	442	1.52e-119	3656	Cucumis melo	muskmelon	Eukaryota
Contig1582	Cucumis melo genomic chromosome, chr_4	79.887	364	3.38e-96	3656	Cucumis melo	muskmelon	Eukaryota
Contig1583	Cucumis melo genomic chromosome, chr_1	96.61	584	2.38e-162	3656	Cucumis melo	muskmelon	Eukaryota
Contig1585	Cucumis melo genomic chromosome, chr_8	87.5	693	0	3656	Cucumis melo	muskmelon	Eukaryota
Contig1586	Cucumis melo genomic chromosome, chr_5	85.246	185	2.81e-42	3656	Cucumis melo	muskmelon	Eukaryota
Contig1587	Cucumis melo genomic chromosome, chr_6	89.735	381	3.34e-101	3656	Cucumis melo	muskmelon	Eukaryota
Contig1588	Cucumis melo genomic chromosome, chr_10	81.269	257	5.88e-64	3656	Cucumis melo	muskmelon	Eukaryota
Contig1589	Cucumis melo genomic chromosome, chr_7	90.255	856	0	3656	Cucumis melo	muskmelon	Eukaryota
Contig1590	Cucumis melo genomic chromosome, chr_5	88.415	568	2.39e-157	3656	Cucumis melo	muskmelon	Eukaryota
Contig1591	Cucumis melo genomic chromosome, chr_6	89.686	272	2.1e-68	3656	Cucumis melo	muskmelon	Eukaryota
Contig1593	Cucumis melo genomic chromosome, chr_1	83.333	231	3.56e-56	3656	Cucumis melo	muskmelon	Eukaryota
Contig1594	Cucumis melo genomic chromosome, chr_11	87.456	651	0	3656	Cucumis melo	muskmelon	Eukaryota
Contig1596	Cucumis melo genomic chromosome, chr_4	82.487	451	2.51e-122	3656	Cucumis melo	muskmelon	Eukaryota
Contig1597	Cucumis melo genomic chromosome, chr_1	81.818	154	7.92e-33	3656	Cucumis melo	muskmelon	Eukaryota
Contig1599	Cucumis melo genomic chromosome, chr_7	90.106	363	1.21e-95	3656	Cucumis melo	muskmelon	Eukaryota
Contig1600	Cucumis melo genomic chromosome, chr_7	84.515	494	4.11e-135	3656	Cucumis melo	muskmelon	Eukaryota
Contig1601	Cucumis melo genomic chromosome, chr_6	88.395	464	3.22e-126	3656	Cucumis melo	muskmelon	Eukaryota
Contig1602	Cucumis melo genomic chromosome, chr_5	78.272	217	9.94e-52	3656	Cucumis melo	muskmelon	Eukaryota
Contig1603	Cucumis melo genomic chromosome, chr_10	81.609	272	2.09e-68	3656	Cucumis melo	muskmelon	Eukaryota
Contig1604	Cucumis melo genomic chromosome, chr_9	80.886	268	2.7e-67	3656	Cucumis melo	muskmelon	Eukaryota
Contig1605	Cucumis melo genomic chromosome, chr_12	85.859	503	6.81e-138	3656	Cucumis melo	muskmelon	Eukaryota
Contig1606	Cucumis melo genomic chromosome, chr_6	83.56	883	0	3656	Cucumis melo	muskmelon	Eukaryota
Contig1607	Cucumis melo genomic chromosome, chr_11	86.469	316	9.51e-82	3656	Cucumis melo	muskmelon	Eukaryota
Contig1608	Cucumis melo genomic chromosome, chr_5	82.129	411	4.24e-110	3656	Cucumis melo	muskmelon	Eukaryota
Contig1609	Cucumis melo genomic chromosome, chr_8	80.655	248	3.52e-61	3656	Cucumis melo	muskmelon	Eukaryota
Contig1611	Cucumis melo genomic chromosome, chr_2	89.836	839	0	3656	Cucumis melo	muskmelon	Eukaryota
Contig1612	Cucumis melo genomic chromosome, chr_5	81.655	424	5.44e-114	3656	Cucumis melo	muskmelon	Eukaryota
Contig1613	Cucumis melo genomic chromosome, chr_5	91.395	580	3.05e-161	3656	Cucumis melo	muskmelon	Eukaryota
Contig1614	Cucumis melo genomic chromosome, chr_8	84.552	667	0	3656	Cucumis melo	muskmelon	Eukaryota
Contig1615	Cucumis melo genomic chromosome, chr_6	90.667	479	1.14e-130	3656	Cucumis melo	muskmelon	Eukaryota
Contig1616	Cucumis melo genomic chromosome, chr_8	82.955	147	1.32e-30	3656	Cucumis melo	muskmelon	Eukaryota
Contig1617	Cucumis melo genomic chromosome, chr_5	88.319	401	2.55e-107	3656	Cucumis melo	muskmelon	Eukaryota
Contig1618	Cucumis melo genomic chromosome, chr_7	85.215	1016	0	3656	Cucumis melo	muskmelon	Eukaryota
Contig1619	Cucumis melo genomic chromosome, chr_9	92.683	1044	0	3656	Cucumis melo	muskmelon	Eukaryota
Contig1620	Cucumis melo genomic chromosome, chr_8	85.366	446	1.16e-120	3656	Cucumis melo	muskmelon	Eukaryota
Contig1622	Cucumis melo genomic chromosome, chr_1	79.151	497	3.15e-136	3656	Cucumis melo	muskmelon	Eukaryota
Contig1624	Cucumis melo genomic chromosome, chr_8	87.535	385	2.56e-102	3656	Cucumis melo	muskmelon	Eukaryota
Contig1625	Cucumis melo genomic chromosome, chr_3	85.612	270	7.47e-68	3656	Cucumis melo	muskmelon	Eukaryota
Contig1626	Cucumis melo genomic chromosome, chr_11	76.611	324	5.65e-84	3656	Cucumis melo	muskmelon	Eukaryota
Contig1627	Cucumis melo genomic chromosome, chr_1	89.712	303	7.35e-78	3656	Cucumis melo	muskmelon	Eukaryota
Contig1628	Cucumis melo genomic chromosome, chr_5	87.321	628	1.07e-175	3656	Cucumis melo	muskmelon	Eukaryota
Contig1629	Cucumis melo genomic chromosome, chr_11	87.179	501	2.43e-137	3656	Cucumis melo	muskmelon	Eukaryota
Contig1630	Cucumis melo genomic chromosome, chr_12	79.477	315	3.4e-81	3656	Cucumis melo	muskmelon	Eukaryota
Contig1631	Cucumis melo genomic chromosome, chr_2	91.72	213	1.27e-50	3656	Cucumis melo	muskmelon	Eukaryota
Contig1632	Cucumis melo genomic chromosome, chr_1	87.037	235	2.72e-57	3656	Cucumis melo	muskmelon	Eukaryota
Contig1633	Cucumis melo genomic chromosome, chr_9	88.897	1598	0	3656	Cucumis melo	muskmelon	Eukaryota
Contig1634	Cucumis melo genomic chromosome, chr_7	83.008	440	5.37e-119	3656	Cucumis melo	muskmelon	Eukaryota
Contig1635	Cucumis melo genomic chromosome, chr_12	88.158	966	0	3656	Cucumis melo	muskmelon	Eukaryota
Contig1636	Cucumis melo genomic chromosome, chr_8	90.984	481	3.16e-131	3656	Cucumis melo	muskmelon	Eukaryota
Contig1638	Cucumis melo genomic chromosome, chr_2	79.294	712	0	3656	Cucumis melo	muskmelon	Eukaryota
Contig1643	Cucumis melo genomic chromosome, chr_4	81.685	422	1.94e-113	3656	Cucumis melo	muskmelon	Eukaryota
Contig1644	Cucumis melo genomic chromosome, chr_7	81.985	230	1.26e-55	3656	Cucumis melo	muskmelon	Eukaryota
Contig1645	Cucumis melo genomic chromosome, chr_3	91.908	239	2.1e-58	3656	Cucumis melo	muskmelon	Eukaryota
Contig1646	Cucumis melo genomic chromosome, chr_3	93.519	159	1.68e-34	3656	Cucumis melo	muskmelon	Eukaryota
Contig1647	Cucumis melo genomic chromosome, chr_3	81.038	396	1.17e-105	3656	Cucumis melo	muskmelon	Eukaryota
Contig1648	Cucumis melo genomic chromosome, chr_7	84.286	514	3.11e-141	3656	Cucumis melo	muskmelon	Eukaryota
Contig1649	Cucumis melo genomic chromosome, chr_1	80.357	159	1.68e-34	3656	Cucumis melo	muskmelon	Eukaryota
Contig1650	Cucumis melo genomic chromosome, chr_3	78.409	278	4.44e-70	3656	Cucumis melo	muskmelon	Eukaryota
Contig1654	Cucumis melo genomic chromosome, chr_12	88.953	850	0	3656	Cucumis melo	muskmelon	Eukaryota
Contig1655	Cucumis melo genomic chromosome, chr_5	94.49	558	1.41e-154	3656	Cucumis melo	muskmelon	Eukaryota
Contig1656	Cucumis melo genomic chromosome, chr_9	86.207	206	2.12e-48	3656	Cucumis melo	muskmelon	Eukaryota
Contig1657	Cucumis melo genomic chromosome, chr_11	89.764	156	2.16e-33	3656	Cucumis melo	muskmelon	Eukaryota
Contig1658	Cucumis melo genomic chromosome, chr_1	92.96	1932	0	3656	Cucumis melo	muskmelon	Eukaryota
Contig1659	Cucumis melo genomic chromosome, chr_3	84.856	379	1.18e-100	3656	Cucumis melo	muskmelon	Eukaryota
Contig1660	Cucumis melo genomic chromosome, chr_1	85.87	187	7.66e-43	3656	Cucumis melo	muskmelon	Eukaryota
Contig1661	Cucumis melo genomic chromosome, chr_3	84.627	656	0	3656	Cucumis melo	muskmelon	Eukaryota
Contig1662	Cucumis melo genomic chromosome, chr_11	81.594	390	5.44e-104	3656	Cucumis melo	muskmelon	Eukaryota
Contig1663	Cucumis melo genomic chromosome, chr_3	83.117	132	3.64e-26	3656	Cucumis melo	muskmelon	Eukaryota
Contig1664	Cucumis melo genomic chromosome, chr_3	84.818	298	3.39e-76	3656	Cucumis melo	muskmelon	Eukaryota
Contig1665	Cucumis melo genomic chromosome, chr_1	83.673	987	0	3656	Cucumis melo	muskmelon	Eukaryota
Contig1667	Cucumis melo genomic chromosome, chr_8	80.244	339	2e-88	3656	Cucumis melo	muskmelon	Eukaryota
Contig1668	Cucumis melo genomic chromosome, chr_9	96.847	370	7.08e-98	3656	Cucumis melo	muskmelon	Eukaryota
Contig1669	Cucumis melo genomic chromosome, chr_4	88.649	224	5.83e-54	3656	Cucumis melo	muskmelon	Eukaryota
Contig1670	Cucumis melo genomic chromosome, chr_8	83.159	1173	0	3656	Cucumis melo	muskmelon	Eukaryota
Contig1671	Cucumis melo genomic scaffold, unassembled_sequence35263	83.333	272	2.05e-68	3656	Cucumis melo	muskmelon	Eukaryota
Contig1672	Cucumis melo genomic chromosome, chr_10	90.047	267	9.54e-67	3656	Cucumis melo	muskmelon	Eukaryota
Contig1673	Cucumis melo genomic chromosome, chr_1	85.366	165	3.58e-36	3656	Cucumis melo	muskmelon	Eukaryota
Contig1674	Cucumis melo genomic chromosome, chr_7	88.78	246	1.24e-60	3656	Cucumis melo	muskmelon	Eukaryota
Contig1675	Cucumis melo genomic chromosome, chr_11	89.638	741	0	3656	Cucumis melo	muskmelon	Eukaryota
Contig1676	Cucumis melo genomic chromosome, chr_5	77.149	230	1.25e-55	3656	Cucumis melo	muskmelon	Eukaryota
Contig1679	Cucumis melo genomic chromosome, chr_5	90.303	213	1.26e-50	3656	Cucumis melo	muskmelon	Eukaryota
Contig1680	Cucumis melo genomic chromosome, chr_5	79.495	433	8.89e-117	3656	Cucumis melo	muskmelon	Eukaryota
Contig1681	Cucumis melo genomic chromosome, chr_1	79.597	276	1.58e-69	3656	Cucumis melo	muskmelon	Eukaryota
Contig1682	Cucumis melo genomic chromosome, chr_11	90.873	327	4.31e-85	3656	Cucumis melo	muskmelon	Eukaryota
Contig1684	Cucumis melo genomic chromosome, chr_12	83.449	505	1.86e-138	3656	Cucumis melo	muskmelon	Eukaryota
Contig1685	Cucumis melo genomic chromosome, chr_7	81.899	274	5.7e-69	3656	Cucumis melo	muskmelon	Eukaryota
Contig1686	Cucumis melo genomic chromosome, chr_3	82.938	180	1.28e-40	3656	Cucumis melo	muskmelon	Eukaryota
Contig1687	Cucumis melo genomic chromosome, chr_5	91.607	1323	0	3656	Cucumis melo	muskmelon	Eukaryota
Contig1688	Cucumis melo genomic chromosome, chr_6	85.096	1155	0	3656	Cucumis melo	muskmelon	Eukaryota
Contig1689	Cucumis melo genomic chromosome, chr_4	92.057	1273	0	3656	Cucumis melo	muskmelon	Eukaryota
Contig1691	Cucumis melo genomic chromosome, chr_8	91.667	1794	0	3656	Cucumis melo	muskmelon	Eukaryota
Contig1692	Cucumis melo genomic chromosome, chr_5	88.889	854	0	3656	Cucumis melo	muskmelon	Eukaryota
Contig1693	Cucumis melo genomic chromosome, chr_6	89.294	532	8.48e-147	3656	Cucumis melo	muskmelon	Eukaryota
Contig1694	Cucumis melo genomic chromosome, chr_7	82.133	276	1.58e-69	3656	Cucumis melo	muskmelon	Eukaryota
Contig1695	Cucumis melo genomic chromosome, chr_3	92.308	239	2.07e-58	3656	Cucumis melo	muskmelon	Eukaryota
Contig1696	Cucumis melo genomic chromosome, chr_10	80.092	303	7.24e-78	3656	Cucumis melo	muskmelon	Eukaryota
Contig1697	Cucumis melo genomic chromosome, chr_9	92.899	488	1.86e-133	3656	Cucumis melo	muskmelon	Eukaryota
Contig1698	Cucumis melo genomic chromosome, chr_3	90.357	355	1.97e-93	3656	Cucumis melo	muskmelon	Eukaryota
Contig1699	Cucumis melo genomic scaffold, unassembled_sequence32457	88.696	267	9.49e-67	3656	Cucumis melo	muskmelon	Eukaryota
Contig1701	Cucumis melo genomic chromosome, chr_9	93.525	206	2.1e-48	3656	Cucumis melo	muskmelon	Eukaryota
Contig1703	Cucumis melo genomic chromosome, chr_4	94.148	593	3.83e-165	3656	Cucumis melo	muskmelon	Eukaryota
Contig1704	Cucumis melo genomic chromosome, chr_12	87.258	405	1.92e-108	3656	Cucumis melo	muskmelon	Eukaryota
Contig1705	Cucumis melo genomic chromosome, chr_4	89.037	353	7.07e-93	3656	Cucumis melo	muskmelon	Eukaryota
Contig1706	Cucumis melo genomic chromosome, chr_10	82.5	357	5.46e-94	3656	Cucumis melo	muskmelon	Eukaryota
Contig1707	Cucumis melo genomic chromosome, chr_10	92.597	1131	0	3656	Cucumis melo	muskmelon	Eukaryota
Contig1709	Cucumis melo genomic chromosome, chr_1	84.024	632	8.1e-177	3656	Cucumis melo	muskmelon	Eukaryota
Contig1713	Cucumis melo genomic chromosome, chr_10	87.963	630	2.91e-176	3656	Cucumis melo	muskmelon	Eukaryota
Contig1715	Cucumis melo genomic chromosome, chr_9	93.627	303	7.21e-78	3656	Cucumis melo	muskmelon	Eukaryota
Contig1716	Cucumis melo genomic chromosome, chr_9	84.524	163	1.28e-35	3656	Cucumis melo	muskmelon	Eukaryota
Contig1718	Cucumis melo genomic chromosome, chr_6	93.38	425	1.47e-114	3656	Cucumis melo	muskmelon	Eukaryota
Contig1719	Cucumis melo genomic chromosome, chr_9	85.625	316	9.24e-82	3656	Cucumis melo	muskmelon	Eukaryota
Contig1720	Cucumis melo genomic chromosome, chr_12	85.545	505	1.84e-138	3656	Cucumis melo	muskmelon	Eukaryota
Contig1721	Cucumis melo genomic chromosome, chr_10	81.971	344	4.24e-90	3656	Cucumis melo	muskmelon	Eukaryota
Contig1722	Cucumis melo genomic chromosome, chr_2	86.842	211	4.48e-50	3656	Cucumis melo	muskmelon	Eukaryota
Contig1723	Cucumis melo genomic chromosome, chr_5	94.526	422	1.9e-113	3656	Cucumis melo	muskmelon	Eukaryota
Contig1724	Cucumis melo genomic chromosome, chr_2	88.22	869	0	3656	Cucumis melo	muskmelon	Eukaryota
Contig1725	Cucumis melo genomic chromosome, chr_4	86.875	523	5.07e-144	3656	Cucumis melo	muskmelon	Eukaryota
Contig1728	Cucumis melo genomic chromosome, chr_2	83.158	163	1.27e-35	3656	Cucumis melo	muskmelon	Eukaryota
Contig1733	Cucumis melo genomic chromosome, chr_10	80.357	191	5.82e-44	3656	Cucumis melo	muskmelon	Eukaryota
Contig1734	Cucumis melo genomic chromosome, chr_10	76.641	435	2.44e-117	3656	Cucumis melo	muskmelon	Eukaryota
Contig1735	Cucumis melo genomic chromosome, chr_8	80.591	169	2.73e-37	3656	Cucumis melo	muskmelon	Eukaryota
Contig1737	Cucumis melo genomic chromosome, chr_9	86.381	536	6.48e-148	3656	Cucumis melo	muskmelon	Eukaryota
Contig1740	Cucumis melo genomic chromosome, chr_2	80.07	392	1.48e-104	3656	Cucumis melo	muskmelon	Eukaryota
Contig1741	Cucumis melo genomic chromosome, chr_10	84.574	344	4.21e-90	3656	Cucumis melo	muskmelon	Eukaryota
Contig1743	Cucumis melo genomic chromosome, chr_8	80.266	307	5.53e-79	3656	Cucumis melo	muskmelon	Eukaryota
Contig1745	Cucumis melo genomic chromosome, chr_4	90.09	852	0	3656	Cucumis melo	muskmelon	Eukaryota
Contig1746	Cucumis melo genomic chromosome, chr_7	85.714	335	2.53e-87	3656	Cucumis melo	muskmelon	Eukaryota
Contig1747	Cucumis melo genomic chromosome, chr_7	84.247	392	1.48e-104	3656	Cucumis melo	muskmelon	Eukaryota
Contig1750	Cucumis melo genomic chromosome, chr_11	89.094	647	0	3656	Cucumis melo	muskmelon	Eukaryota
Contig1751	Cucumis melo genomic chromosome, chr_6	86.262	824	0	3656	Cucumis melo	muskmelon	Eukaryota
Contig1754	Cucumis melo genomic chromosome, chr_8	82.051	124	5.96e-24	3656	Cucumis melo	muskmelon	Eukaryota
Contig1756	Cucumis melo genomic chromosome, chr_8	92.888	671	0	3656	Cucumis melo	muskmelon	Eukaryota
Contig1757	Cucumis melo genomic chromosome, chr_11	83.193	392	1.48e-104	3656	Cucumis melo	muskmelon	Eukaryota
Contig1758	Cucumis melo genomic chromosome, chr_4	78.96	257	5.63e-64	3656	Cucumis melo	muskmelon	Eukaryota
Contig1760	Cucumis melo genomic chromosome, chr_12	81.863	767	0	3656	Cucumis melo	muskmelon	Eukaryota
Contig1761	Cucumis melo genomic chromosome, chr_9	93.426	1906	0	3656	Cucumis melo	muskmelon	Eukaryota
Contig1762	Cucumis melo genomic chromosome, chr_7	88.347	420	6.78e-113	3656	Cucumis melo	muskmelon	Eukaryota
Contig1763	Cucumis melo genomic chromosome, chr_4	86.318	621	1.73e-173	3656	Cucumis melo	muskmelon	Eukaryota
Contig1764	Cucumis melo genomic chromosome, chr_5	85.526	292	1.54e-74	3656	Cucumis melo	muskmelon	Eukaryota
Contig1765	Cucumis melo genomic chromosome, chr_11	80.023	545	1.07e-150	3656	Cucumis melo	muskmelon	Eukaryota
Contig1766	Cucumis melo genomic chromosome, chr_3	85.269	699	0	3656	Cucumis melo	muskmelon	Eukaryota
Contig1767	Cucumis melo genomic chromosome, chr_6	87.5	267	9.34e-67	3656	Cucumis melo	muskmelon	Eukaryota
Contig1768	Cucumis melo genomic chromosome, chr_11	83.677	1014	0	3656	Cucumis melo	muskmelon	Eukaryota
Contig1769	Cucumis melo genomic chromosome, chr_2	82.29	640	4.77e-179	3656	Cucumis melo	muskmelon	Eukaryota
Contig1774	Cucumis melo genomic chromosome, chr_5	82.938	180	1.25e-40	3656	Cucumis melo	muskmelon	Eukaryota
Contig1776	Cucumis melo genomic chromosome, chr_9	79.947	496	1.09e-135	3656	Cucumis melo	muskmelon	Eukaryota
Contig1777	Cucumis melo genomic chromosome, chr_12	81.863	326	1.52e-84	3656	Cucumis melo	muskmelon	Eukaryota
Contig1778	Cucumis melo genomic chromosome, chr_4	80.828	590	4.87e-164	3656	Cucumis melo	muskmelon	Eukaryota
Contig1779	Cucumis melo genomic chromosome, chr_4	97.23	612	1.04e-170	3656	Cucumis melo	muskmelon	Eukaryota
Contig1782	Cucumis melo genomic chromosome, chr_12	79.303	584	2.26e-162	3656	Cucumis melo	muskmelon	Eukaryota
Contig1783	Cucumis melo genomic chromosome, chr_5	81.897	451	2.4e-122	3656	Cucumis melo	muskmelon	Eukaryota
Contig1784	Cucumis melo genomic chromosome, chr_9	93.407	667	0	3656	Cucumis melo	muskmelon	Eukaryota
Contig1785	Cucumis melo genomic chromosome, chr_2	82.578	459	1.43e-124	3656	Cucumis melo	muskmelon	Eukaryota
Contig1786	Cucumis melo genomic chromosome, chr_11	84.021	1205	0	3656	Cucumis melo	muskmelon	Eukaryota
Contig1788	Cucumis melo genomic chromosome, chr_1	83.645	370	6.89e-98	3656	Cucumis melo	muskmelon	Eukaryota
Contig1790	Cucumis melo genomic chromosome, chr_12	89.474	322	1.96e-83	3656	Cucumis melo	muskmelon	Eukaryota
Contig1791	Cucumis melo genomic chromosome, chr_11	78.448	309	1.52e-79	3656	Cucumis melo	muskmelon	Eukaryota
Contig1792	Cucumis melo genomic chromosome, chr_4	82.635	403	6.78e-108	3656	Cucumis melo	muskmelon	Eukaryota
Contig1793	Cucumis melo genomic chromosome, chr_7	90.625	248	3.36e-61	3656	Cucumis melo	muskmelon	Eukaryota
Contig1795	Cucumis melo genomic chromosome, chr_7	94.523	983	0	3656	Cucumis melo	muskmelon	Eukaryota
Contig1796	Cucumis melo genomic chromosome, chr_10	90.184	207	5.7e-49	3656	Cucumis melo	muskmelon	Eukaryota
Contig1799	Cucumis melo genomic chromosome, chr_10	92.655	254	7.21e-63	3656	Cucumis melo	muskmelon	Eukaryota
Contig1800	Cucumis melo genomic chromosome, chr_9	90.066	193	1.59e-44	3656	Cucumis melo	muskmelon	Eukaryota
Contig1801	Cucumis melo genomic chromosome, chr_10	83.946	462	1.1e-125	3656	Cucumis melo	muskmelon	Eukaryota
Contig1802	Cucumis melo genomic chromosome, chr_2	81.117	265	3.33e-66	3656	Cucumis melo	muskmelon	Eukaryota
Contig1803	Cucumis melo genomic chromosome, chr_11	84.855	422	1.86e-113	3656	Cucumis melo	muskmelon	Eukaryota
Contig1804	Cucumis melo genomic chromosome, chr_1	83.744	351	2.48e-92	3656	Cucumis melo	muskmelon	Eukaryota
Contig1806	Cucumis melo genomic chromosome, chr_7	85.191	1171	0	3656	Cucumis melo	muskmelon	Eukaryota
Contig1807	Cucumis melo genomic chromosome, chr_11	80.388	353	6.89e-93	3656	Cucumis melo	muskmelon	Eukaryota
Contig1809	Cucumis melo genomic chromosome, chr_11	91.791	185	2.66e-42	3656	Cucumis melo	muskmelon	Eukaryota
Contig1810	Cucumis melo genomic chromosome, chr_9	81.991	154	7.5e-33	3656	Cucumis melo	muskmelon	Eukaryota
Contig1811	Cucumis melo genomic chromosome, chr_6	77.823	401	2.43e-107	3656	Cucumis melo	muskmelon	Eukaryota
Contig1812	Cucumis melo genomic chromosome, chr_11	79.024	263	1.19e-65	3656	Cucumis melo	muskmelon	Eukaryota
Contig1813	Cucumis melo genomic chromosome, chr_6	91.304	527	3.84e-145	3656	Cucumis melo	muskmelon	Eukaryota
Contig1816	Cucumis melo genomic chromosome, chr_6	88.263	239	2.01e-58	3656	Cucumis melo	muskmelon	Eukaryota
Contig1817	Cucumis melo genomic chromosome, chr_3	86.306	324	5.4e-84	3656	Cucumis melo	muskmelon	Eukaryota
Contig1818	Cucumis melo genomic chromosome, chr_12	81.798	340	5.36e-89	3656	Cucumis melo	muskmelon	Eukaryota
Contig1819	Cucumis melo genomic chromosome, chr_6	83.008	568	2.26e-157	3656	Cucumis melo	muskmelon	Eukaryota
Contig1820	Cucumis melo genomic chromosome, chr_12	80.745	244	4.32e-60	3656	Cucumis melo	muskmelon	Eukaryota
Contig1821	Cucumis melo genomic chromosome, chr_11	87.452	298	3.27e-76	3656	Cucumis melo	muskmelon	Eukaryota
Contig1824	Cucumis melo genomic chromosome, chr_11	80.979	774	0	3656	Cucumis melo	muskmelon	Eukaryota
Contig1825	Cucumis melo genomic chromosome, chr_4	86.603	222	2.02e-53	3656	Cucumis melo	muskmelon	Eukaryota
Contig1826	Cucumis melo genomic chromosome, chr_7	77.752	222	2.02e-53	3656	Cucumis melo	muskmelon	Eukaryota
Contig1827	Cucumis melo genomic chromosome, chr_8	81.72	148	3.48e-31	3656	Cucumis melo	muskmelon	Eukaryota
Contig1828	PREDICTED: Cucumis melo putative disease resistance protein RGA4 (LOC107991801), partial mRNA	92.683	294	4.23e-75	3656	Cucumis melo	muskmelon	Eukaryota
Contig1829	Cucumis melo genomic chromosome, chr_4	81.208	656	0	3656	Cucumis melo	muskmelon	Eukaryota
Contig1831	Cucumis melo genomic chromosome, chr_4	81.905	169	2.67e-37	3656	Cucumis melo	muskmelon	Eukaryota
Contig1832	Cucumis melo genomic chromosome, chr_10	87.978	213	1.22e-50	3656	Cucumis melo	muskmelon	Eukaryota
Contig1833	Cucumis melo genomic chromosome, chr_8	89.427	1376	0	3656	Cucumis melo	muskmelon	Eukaryota
Contig1834	Cucumis melo genomic chromosome, chr_10	91.195	422	1.86e-113	3656	Cucumis melo	muskmelon	Eukaryota
Contig1835	Cucumis melo genomic chromosome, chr_7	90.373	1646	0	3656	Cucumis melo	muskmelon	Eukaryota
Contig1836	Cucumis melo genomic chromosome, chr_7	85.654	966	0	3656	Cucumis melo	muskmelon	Eukaryota
Contig1837	Cucumis melo genomic chromosome, chr_6	83.271	475	1.4e-129	3656	Cucumis melo	muskmelon	Eukaryota
Contig1839	Cucumis melo genomic chromosome, chr_3	83.558	326	1.49e-84	3656	Cucumis melo	muskmelon	Eukaryota
Contig1840	Cucumis melo genomic chromosome, chr_6	82.334	261	4.27e-65	3656	Cucumis melo	muskmelon	Eukaryota
Contig1841	Cucumis melo genomic chromosome, chr_1	88.444	265	3.3e-66	3656	Cucumis melo	muskmelon	Eukaryota
Contig1842	Cucumis melo genomic chromosome, chr_3	87.975	185	2.64e-42	3656	Cucumis melo	muskmelon	Eukaryota
Contig1843	Cucumis melo genomic chromosome, chr_11	78.772	686	0	3656	Cucumis melo	muskmelon	Eukaryota
Contig1845	Cucumis melo genomic chromosome, chr_6	79.092	449	8.48e-122	3656	Cucumis melo	muskmelon	Eukaryota
Contig1846	Cucumis melo genomic chromosome, chr_12	88.718	1147	0	3656	Cucumis melo	muskmelon	Eukaryota
Contig1847	Cucumis melo genomic chromosome, chr_4	88.641	628	1.01e-175	3656	Cucumis melo	muskmelon	Eukaryota
Contig1849	Cucumis melo genomic chromosome, chr_6	75.495	453	6.55e-123	3656	Cucumis melo	muskmelon	Eukaryota
Contig1850	Cucumis melo genomic chromosome, chr_4	95.107	514	2.96e-141	3656	Cucumis melo	muskmelon	Eukaryota
Contig1852	Cucumis melo genomic chromosome, chr_4	85.974	383	8.71e-102	3656	Cucumis melo	muskmelon	Eukaryota
Contig1853	Cucumis melo genomic chromosome, chr_3	79.936	424	5.13e-114	3656	Cucumis melo	muskmelon	Eukaryota
Contig1854	Cucumis melo genomic chromosome, chr_10	84.511	780	0	3656	Cucumis melo	muskmelon	Eukaryota
Contig1855	Cucumis melo genomic chromosome, chr_7	96.905	865	0	3656	Cucumis melo	muskmelon	Eukaryota
Contig1857	Cucumis melo genomic chromosome, chr_12	80.891	488	1.79e-133	3656	Cucumis melo	muskmelon	Eukaryota
Contig1859	Cucumis melo genomic chromosome, chr_2	84.965	553	6.27e-153	3656	Cucumis melo	muskmelon	Eukaryota
Contig1860	Cucumis melo genomic chromosome, chr_4	85.283	259	1.53e-64	3656	Cucumis melo	muskmelon	Eukaryota
Contig1861	Cucumis melo genomic chromosome, chr_12	86.395	460	3.91e-125	3656	Cucumis melo	muskmelon	Eukaryota
Contig1862	Cucumis melo genomic chromosome, chr_10	89.754	303	6.96e-78	3656	Cucumis melo	muskmelon	Eukaryota
Contig1863	Cucumis melo genomic chromosome, chr_9	85.987	165	3.42e-36	3656	Cucumis melo	muskmelon	Eukaryota
Contig1864	Cucumis melo genomic chromosome, chr_4	85.294	135	2.69e-27	3656	Cucumis melo	muskmelon	Eukaryota
Contig1865	Cucumis melo genomic chromosome, chr_5	92.554	1770	0	3656	Cucumis melo	muskmelon	Eukaryota
Contig1866	Cucumis melo genomic chromosome, chr_3	78.837	272	1.96e-68	3656	Cucumis melo	muskmelon	Eukaryota
Contig1867	Cucumis melo genomic chromosome, chr_6	83.103	496	1.07e-135	3656	Cucumis melo	muskmelon	Eukaryota
Contig1868	Cucumis melo genomic chromosome, chr_2	91.353	1218	0	3656	Cucumis melo	muskmelon	Eukaryota
Contig1869	Cucumis melo genomic chromosome, chr_10	84.868	433	8.5e-117	3656	Cucumis melo	muskmelon	Eukaryota
Contig1871	Cucumis melo genomic chromosome, chr_8	94.828	449	8.44e-122	3656	Cucumis melo	muskmelon	Eukaryota
Contig1873	Cucumis melo genomic scaffold, unanchored_scaffold00686	84.576	357	5.26e-94	3656	Cucumis melo	muskmelon	Eukaryota
Contig1874	Cucumis melo genomic chromosome, chr_8	89.809	200	9.37e-47	3656	Cucumis melo	muskmelon	Eukaryota
Contig1875	Cucumis melo genomic chromosome, chr_2	86.261	597	2.84e-166	3656	Cucumis melo	muskmelon	Eukaryota
Contig1876	Cucumis melo genomic chromosome, chr_5	84.748	1238	0	3656	Cucumis melo	muskmelon	Eukaryota
Contig1877	Cucumis melo genomic chromosome, chr_2	80.315	867	0	3656	Cucumis melo	muskmelon	Eukaryota
Contig1879	Cucumis melo genomic scaffold, unassembled_sequence36736	83.784	163	1.23e-35	3656	Cucumis melo	muskmelon	Eukaryota
Contig1880	Cucumis melo genomic chromosome, chr_6	91.541	444	3.92e-120	3656	Cucumis melo	muskmelon	Eukaryota
Contig1882	Cucumis melo genomic chromosome, chr_4	87.692	568	2.23e-157	3656	Cucumis melo	muskmelon	Eukaryota
Contig1883	Cucumis melo genomic chromosome, chr_2	75.496	372	1.87e-98	3656	Cucumis melo	muskmelon	Eukaryota
Contig1884	Cucumis melo genomic chromosome, chr_7	82.167	494	3.83e-135	3656	Cucumis melo	muskmelon	Eukaryota
Contig1885	Cucumis melo genomic chromosome, chr_5	89.017	846	0	3656	Cucumis melo	muskmelon	Eukaryota
Contig1886	Cucumis melo genomic chromosome, chr_9	88.835	246	1.19e-60	3656	Cucumis melo	muskmelon	Eukaryota
Contig1888	Cucumis melo genomic chromosome, chr_6	87.429	974	0	3656	Cucumis melo	muskmelon	Eukaryota
Contig1891	Cucumis melo genomic chromosome, chr_4	92.908	204	7.23e-48	3656	Cucumis melo	muskmelon	Eukaryota
Contig1892	Cucumis melo genomic chromosome, chr_3	82.774	749	0	3656	Cucumis melo	muskmelon	Eukaryota
Contig1893	Cucumis melo genomic chromosome, chr_9	97.021	394	4e-105	3656	Cucumis melo	muskmelon	Eukaryota
Contig1894	Cucumis melo genomic chromosome, chr_3	86.928	333	8.83e-87	3656	Cucumis melo	muskmelon	Eukaryota
Contig1895	Cucumis melo genomic chromosome, chr_8	86.493	828	0	3656	Cucumis melo	muskmelon	Eukaryota
Contig1897	Cucumis melo genomic chromosome, chr_11	92.278	1456	0	3656	Cucumis melo	muskmelon	Eukaryota
Contig1898	Cucumis melo genomic chromosome, chr_5	84.901	375	1.45e-99	3656	Cucumis melo	muskmelon	Eukaryota
Contig1899	Cucumis melo genomic scaffold, unanchored_scaffold00161	78.977	231	3.31e-56	3656	Cucumis melo	muskmelon	Eukaryota
Contig1900	Cucumis melo genomic chromosome, chr_2	79.612	196	1.21e-45	3656	Cucumis melo	muskmelon	Eukaryota
Contig1902	Cucumis melo genomic scaffold, unassembled_sequence37440	91.864	401	2.38e-107	3656	Cucumis melo	muskmelon	Eukaryota
Contig1903	Cucumis melo genomic chromosome, chr_7	91.304	551	2.24e-152	3656	Cucumis melo	muskmelon	Eukaryota
Contig1904	Cucumis melo genomic chromosome, chr_2	86.025	335	2.45e-87	3656	Cucumis melo	muskmelon	Eukaryota
Contig1905	Cucumis melo genomic chromosome, chr_6	92.566	1772	0	3656	Cucumis melo	muskmelon	Eukaryota
Contig1909	PREDICTED: Cucumis melo vesicle transport protein SFT2B (LOC103485702), mRNA	90.488	527	3.76e-145	3656	Cucumis melo	muskmelon	Eukaryota
Contig1910	Cucumis melo genomic chromosome, chr_1	84.906	455	1.8e-123	3656	Cucumis melo	muskmelon	Eukaryota
Contig1911	Cucumis melo genomic chromosome, chr_6	82.759	248	3.28e-61	3656	Cucumis melo	muskmelon	Eukaryota
Contig1913	Cucumis melo genomic scaffold, unanchored_scaffold00722	82.594	496	1.06e-135	3656	Cucumis melo	muskmelon	Eukaryota
Contig1917	Cucumis melo genomic chromosome, chr_1	95.378	750	0	3656	Cucumis melo	muskmelon	Eukaryota
Contig1918	Cucumis melo genomic chromosome, chr_6	87.736	368	2.41e-97	3656	Cucumis melo	muskmelon	Eukaryota
Contig1919	Cucumis melo genomic chromosome, chr_11	83.363	510	3.78e-140	3656	Cucumis melo	muskmelon	Eukaryota
Contig1921	Cucumis melo genomic chromosome, chr_6	81.962	250	9.09e-62	3656	Cucumis melo	muskmelon	Eukaryota
Contig1923	Cucumis melo genomic chromosome, chr_12	83.108	124	5.75e-24	3656	Cucumis melo	muskmelon	Eukaryota
Contig1924	PREDICTED: Cucumis melo pentatricopeptide repeat-containing protein At4g30825, chloroplastic (LOC103487334), mRNA	90.517	150	9.48e-32	3656	Cucumis melo	muskmelon	Eukaryota
Contig1926	Cucumis melo genomic chromosome, chr_4	78.489	678	0	3656	Cucumis melo	muskmelon	Eukaryota
Contig1928	Cucumis melo genomic chromosome, chr_8	87.558	237	7.07e-58	3656	Cucumis melo	muskmelon	Eukaryota
Contig1930	Cucumis melo genomic chromosome, chr_5	80	150	9.46e-32	3656	Cucumis melo	muskmelon	Eukaryota
Contig1931	Cucumis melo genomic chromosome, chr_5	85.271	130	1.23e-25	3656	Cucumis melo	muskmelon	Eukaryota
Contig1932	Cucumis melo genomic chromosome, chr_5	91.065	383	8.57e-102	3656	Cucumis melo	muskmelon	Eukaryota
Contig1933	Cucumis melo genomic chromosome, chr_9	80.614	702	0	3656	Cucumis melo	muskmelon	Eukaryota
Contig1934	Cucumis melo genomic chromosome, chr_12	92.026	649	0	3656	Cucumis melo	muskmelon	Eukaryota
Contig1935	Cucumis melo genomic chromosome, chr_3	78.926	156	2.03e-33	3656	Cucumis melo	muskmelon	Eukaryota
Contig1937	Cucumis melo genomic chromosome, chr_12	86.433	477	3.82e-130	3656	Cucumis melo	muskmelon	Eukaryota
Contig1938	Cucumis melo genomic chromosome, chr_6	88.714	998	0	3656	Cucumis melo	muskmelon	Eukaryota
Contig1939	Cucumis melo genomic chromosome, chr_6	85.484	243	1.52e-59	3656	Cucumis melo	muskmelon	Eukaryota
Contig1942	Cucumis melo genomic chromosome, chr_4	82.293	542	1.33e-149	3656	Cucumis melo	muskmelon	Eukaryota
Contig1943	Cucumis melo genomic chromosome, chr_4	84.241	318	2.45e-82	3656	Cucumis melo	muskmelon	Eukaryota
Contig1944	Cucumis melo genomic chromosome, chr_5	95.539	427	3.89e-115	3656	Cucumis melo	muskmelon	Eukaryota
Contig1945	Cucumis melo genomic chromosome, chr_9	85.866	289	1.92e-73	3656	Cucumis melo	muskmelon	Eukaryota
Contig1946	Cucumis melo genomic chromosome, chr_3	83.226	254	6.99e-63	3656	Cucumis melo	muskmelon	Eukaryota
Contig1947	Cucumis melo genomic chromosome, chr_9	82.209	246	1.17e-60	3656	Cucumis melo	muskmelon	Eukaryota
Contig1948	Cucumis melo genomic chromosome, chr_9	82.353	154	7.29e-33	3656	Cucumis melo	muskmelon	Eukaryota
Contig1949	Cucumis melo genomic chromosome, chr_4	86.239	222	1.97e-53	3656	Cucumis melo	muskmelon	Eukaryota
Contig1950	Cucumis melo genomic chromosome, chr_8	89.338	335	2.43e-87	3656	Cucumis melo	muskmelon	Eukaryota
Contig1951	Cucumis melo genomic chromosome, chr_8	81.028	193	1.55e-44	3656	Cucumis melo	muskmelon	Eukaryota
Contig1952	Cucumis melo genomic chromosome, chr_11	85.581	211	4.26e-50	3656	Cucumis melo	muskmelon	Eukaryota
Contig1953	Cucumis melo genomic chromosome, chr_10	89.274	388	1.83e-103	3656	Cucumis melo	muskmelon	Eukaryota
Contig1954	Cucumis melo genomic chromosome, chr_3	89.004	571	1.7e-158	3656	Cucumis melo	muskmelon	Eukaryota
Contig1955	Cucumis melo genomic chromosome, chr_7	91.915	324	5.24e-84	3656	Cucumis melo	muskmelon	Eukaryota
Contig1957	Cucumis melo genomic chromosome, chr_7	89.262	909	0	3656	Cucumis melo	muskmelon	Eukaryota
Contig1958	Cucumis melo genomic scaffold, unanchored_scaffold00422	82.474	158	5.63e-34	3656	Cucumis melo	muskmelon	Eukaryota
Contig1959	Cucumis melo genomic chromosome, chr_2	94.538	1179	0	3656	Cucumis melo	muskmelon	Eukaryota
Contig1961	Cucumis melo genomic chromosome, chr_6	85.944	490	4.88e-134	3656	Cucumis melo	muskmelon	Eukaryota
Contig1962	Cucumis melo genomic chromosome, chr_8	79.31	117	9.54e-22	3656	Cucumis melo	muskmelon	Eukaryota
Contig1963	Cucumis melo genomic scaffold, unanchored_scaffold00651	87.383	239	1.95e-58	3656	Cucumis melo	muskmelon	Eukaryota
Contig1965	Cucumis melo genomic chromosome, chr_11	90.511	359	1.43e-94	3656	Cucumis melo	muskmelon	Eukaryota
Contig1966	Cucumis melo genomic chromosome, chr_4	85.062	904	0	3656	Cucumis melo	muskmelon	Eukaryota
Contig1967	Cucumis melo genomic scaffold, unassembled_sequence44208	91.329	231	3.26e-56	3656	Cucumis melo	muskmelon	Eukaryota
Contig1968	Cucumis melo genomic chromosome, chr_3	76.667	377	3.96e-100	3656	Cucumis melo	muskmelon	Eukaryota
Contig1969	Cucumis melo genomic chromosome, chr_3	87.932	1399	0	3656	Cucumis melo	muskmelon	Eukaryota
Contig1970	Cucumis melo genomic chromosome, chr_7	80.997	608	1.29e-169	3656	Cucumis melo	muskmelon	Eukaryota
Contig1971	Cucumis melo genomic scaffold, unassembled_sequence45161	93.043	501	2.25e-137	3656	Cucumis melo	muskmelon	Eukaryota
Contig1973	Cucumis melo genomic chromosome, chr_1	84.27	412	1.08e-110	3656	Cucumis melo	muskmelon	Eukaryota
Contig1974	Cucumis melo genomic chromosome, chr_5	77.188	172	2e-38	3656	Cucumis melo	muskmelon	Eukaryota
Contig1975	Cucumis melo genomic chromosome, chr_2	74.253	412	1.08e-110	3656	Cucumis melo	muskmelon	Eukaryota
Contig1976	Cucumis melo genomic chromosome, chr_5	88.889	645	0	3656	Cucumis melo	muskmelon	Eukaryota
Contig1979	Cucumis melo genomic chromosome, chr_4	81.538	745	0	3656	Cucumis melo	muskmelon	Eukaryota
Contig1980	Cucumis melo genomic chromosome, chr_8	91.385	795	0	3656	Cucumis melo	muskmelon	Eukaryota
Contig1981	Cucumis melo genomic chromosome, chr_8	90.351	298	3.16e-76	3656	Cucumis melo	muskmelon	Eukaryota
Contig1984	Cucumis melo genomic chromosome, chr_2	81.348	305	1.89e-78	3656	Cucumis melo	muskmelon	Eukaryota
Contig1985	Cucumis melo genomic chromosome, chr_10	93.487	387	6.54e-103	3656	Cucumis melo	muskmelon	Eukaryota
Contig1987	Cucumis melo genomic chromosome, chr_5	80.252	171	7.17e-38	3656	Cucumis melo	muskmelon	Eukaryota
Contig1988	Cucumis melo genomic chromosome, chr_1	82.119	224	5.43e-54	3656	Cucumis melo	muskmelon	Eukaryota
Contig1989	Cucumis melo genomic chromosome, chr_4	80.635	233	9.01e-57	3656	Cucumis melo	muskmelon	Eukaryota
Contig1990	Cucumis melo genomic chromosome, chr_9	82.81	459	1.37e-124	3656	Cucumis melo	muskmelon	Eukaryota
Contig1992	Cucumis melo genomic chromosome, chr_12	84.516	150	9.34e-32	3656	Cucumis melo	muskmelon	Eukaryota
Contig1994	Cucumis melo genomic chromosome, chr_11	79.205	496	1.04e-135	3656	Cucumis melo	muskmelon	Eukaryota
Contig1996	Cucumis melo genomic chromosome, chr_11	83.849	270	6.86e-68	3656	Cucumis melo	muskmelon	Eukaryota
Contig1997	Cucumis melo genomic chromosome, chr_11	89.324	344	3.98e-90	3656	Cucumis melo	muskmelon	Eukaryota
Contig1999	Cucumis melo genomic scaffold, unanchored_scaffold00199	79.268	305	1.88e-78	3656	Cucumis melo	muskmelon	Eukaryota
Contig2000	Cucumis melo genomic chromosome, chr_9	89.552	324	5.19e-84	3656	Cucumis melo	muskmelon	Eukaryota
Contig2001	Cucumis melo genomic chromosome, chr_1	90.116	872	0	3656	Cucumis melo	muskmelon	Eukaryota
Contig2003	Cucumis melo genomic chromosome, chr_11	85.833	361	3.95e-95	3656	Cucumis melo	muskmelon	Eukaryota
Contig2006	Cucumis melo genomic chromosome, chr_2	85.083	171	7.13e-38	3656	Cucumis melo	muskmelon	Eukaryota
Contig2007	Cucumis melo genomic chromosome, chr_8	82.64	791	0	3656	Cucumis melo	muskmelon	Eukaryota
Contig2009	Cucumis melo genomic chromosome, chr_2	83.697	887	0	3656	Cucumis melo	muskmelon	Eukaryota
Contig2010	Cucumis melo genomic chromosome, chr_11	82.192	119	2.62e-22	3656	Cucumis melo	muskmelon	Eukaryota
Contig2011	Cucumis melo genomic chromosome, chr_12	87.01	435	2.29e-117	3656	Cucumis melo	muskmelon	Eukaryota
Contig2014	Cucumis melo genomic chromosome, chr_3	87.154	429	1.06e-115	3656	Cucumis melo	muskmelon	Eukaryota
Contig2015	Cucumis melo genomic chromosome, chr_9	88.496	135	2.6e-27	3656	Cucumis melo	muskmelon	Eukaryota
Contig2016	Cucumis melo genomic chromosome, chr_2	94.643	172	1.98e-38	3656	Cucumis melo	muskmelon	Eukaryota
Contig2017	Cucumis melo genomic chromosome, chr_5	86.777	134	9.33e-27	3656	Cucumis melo	muskmelon	Eukaryota
Contig2018	Cucumis melo genomic chromosome, chr_5	82.42	374	5.05e-99	3656	Cucumis melo	muskmelon	Eukaryota
Contig2019	Cucumis melo genomic chromosome, chr_6	84.921	124	5.61e-24	3656	Cucumis melo	muskmelon	Eukaryota
Contig2020	Cucumis melo genomic chromosome, chr_5	79.487	270	6.81e-68	3656	Cucumis melo	muskmelon	Eukaryota
Contig2021	Cucumis melo genomic chromosome, chr_9	95.21	263	1.14e-65	3656	Cucumis melo	muskmelon	Eukaryota
Contig2022	Cucumis melo genomic chromosome, chr_10	92.099	549	7.81e-152	3656	Cucumis melo	muskmelon	Eukaryota
Contig2023	Cucumis melo genomic chromosome, chr_5	90.711	662	0	3656	Cucumis melo	muskmelon	Eukaryota
Contig2025	Cucumis melo genomic chromosome, chr_6	78.097	363	1.09e-95	3656	Cucumis melo	muskmelon	Eukaryota
Contig2026	Cucumis melo genomic chromosome, chr_5	88.644	379	1.08e-100	3656	Cucumis melo	muskmelon	Eukaryota
Contig2027	Cucumis melo genomic chromosome, chr_7	85.946	195	4.21e-45	3656	Cucumis melo	muskmelon	Eukaryota
Contig2028	Cucumis melo genomic chromosome, chr_11	88.51	662	0	3656	Cucumis melo	muskmelon	Eukaryota
Contig2029	Cucumis melo genomic chromosome, chr_8	86.611	512	1.02e-140	3656	Cucumis melo	muskmelon	Eukaryota
Contig2030	Cucumis melo genomic chromosome, chr_5	90.206	496	1.03e-135	3656	Cucumis melo	muskmelon	Eukaryota
Contig2032	Cucumis melo genomic chromosome, chr_6	93.575	1050	0	3656	Cucumis melo	muskmelon	Eukaryota
Contig2033	Cucumis melo genomic chromosome, chr_4	79.859	193	1.51e-44	3656	Cucumis melo	muskmelon	Eukaryota
Contig2034	Cucumis melo genomic chromosome, chr_8	84.141	215	3.23e-51	3656	Cucumis melo	muskmelon	Eukaryota
Contig2036	Cucumis melo genomic chromosome, chr_6	89.247	333	8.54e-87	3656	Cucumis melo	muskmelon	Eukaryota
Contig2038	Cucumis melo genomic chromosome, chr_12	86.413	198	3.25e-46	3656	Cucumis melo	muskmelon	Eukaryota
Contig2040	Cucumis melo genomic chromosome, chr_1	86.164	159	1.53e-34	3656	Cucumis melo	muskmelon	Eukaryota
Contig2041	Cucumis melo genomic chromosome, chr_12	93.844	898	0	3656	Cucumis melo	muskmelon	Eukaryota
Contig2042	Cucumis melo genomic chromosome, chr_5	85.621	158	5.51e-34	3656	Cucumis melo	muskmelon	Eukaryota
Contig2043	Cucumis melo genomic chromosome, chr_6	83.767	564	2.78e-156	3656	Cucumis melo	muskmelon	Eukaryota
Contig2044	Cucumis melo genomic chromosome, chr_1	81.921	143	1.54e-29	3656	Cucumis melo	muskmelon	Eukaryota
Contig2045	Cucumis melo genomic chromosome, chr_10	77.196	292	1.45e-74	3656	Cucumis melo	muskmelon	Eukaryota
Contig2046	Cucumis melo genomic chromosome, chr_8	88.204	909	0	3656	Cucumis melo	muskmelon	Eukaryota
Contig2047	Cucumis melo genomic chromosome, chr_7	81.514	425	1.37e-114	3656	Cucumis melo	muskmelon	Eukaryota
Contig2048	Cucumis melo genomic chromosome, chr_5	89.021	403	6.4e-108	3656	Cucumis melo	muskmelon	Eukaryota
Contig2049	Cucumis melo genomic chromosome, chr_4	86.429	573	4.61e-159	3656	Cucumis melo	muskmelon	Eukaryota
Contig2050	Cucumis melo genomic scaffold, unassembled_sequence32053	87.589	303	6.67e-78	3656	Cucumis melo	muskmelon	Eukaryota
Contig2052	Cucumis melo genomic chromosome, chr_6	88.991	261	4.07e-65	3656	Cucumis melo	muskmelon	Eukaryota
Contig2053	Cucumis melo genomic chromosome, chr_5	86.423	1123	0	3656	Cucumis melo	muskmelon	Eukaryota
Contig2054	Cucumis melo genomic chromosome, chr_7	91.813	233	8.87e-57	3656	Cucumis melo	muskmelon	Eukaryota
Contig2055	Cucumis melo genomic chromosome, chr_6	89.971	424	4.9e-114	3656	Cucumis melo	muskmelon	Eukaryota
Contig2056	Cucumis melo genomic chromosome, chr_5	77.008	327	3.95e-85	3656	Cucumis melo	muskmelon	Eukaryota
Contig2057	Cucumis melo genomic chromosome, chr_3	90.566	819	0	3656	Cucumis melo	muskmelon	Eukaryota
Contig2058	Cucumis melo genomic chromosome, chr_12	86.413	1312	0	3656	Cucumis melo	muskmelon	Eukaryota
Contig2059	Cucumis melo genomic chromosome, chr_2	87.252	924	0	3656	Cucumis melo	muskmelon	Eukaryota
Contig2060	Cucumis melo genomic chromosome, chr_8	87.069	388	1.79e-103	3656	Cucumis melo	muskmelon	Eukaryota
Contig2063	Cucumis melo genomic chromosome, chr_10	77.5	183	9.04e-42	3656	Cucumis melo	muskmelon	Eukaryota
Contig2064	Cucumis melo genomic chromosome, chr_8	82.21	697	0	3656	Cucumis melo	muskmelon	Eukaryota
Contig2065	Cucumis melo genomic chromosome, chr_10	82.718	433	8.13e-117	3656	Cucumis melo	muskmelon	Eukaryota
Contig2066	Cucumis melo genomic chromosome, chr_8	89.686	276	1.45e-69	3656	Cucumis melo	muskmelon	Eukaryota
Contig2067	Cucumis melo genomic chromosome, chr_2	93.673	843	0	3656	Cucumis melo	muskmelon	Eukaryota
Contig2068	Cucumis melo genomic chromosome, chr_4	86	257	5.25e-64	3656	Cucumis melo	muskmelon	Eukaryota
Contig2069	Cucumis melo genomic chromosome, chr_4	95.364	237	6.83e-58	3656	Cucumis melo	muskmelon	Eukaryota
Contig2073	Cucumis melo genomic chromosome, chr_11	91.667	675	0	3656	Cucumis melo	muskmelon	Eukaryota
Contig2074	Cucumis melo genomic chromosome, chr_2	93.914	1085	0	3656	Cucumis melo	muskmelon	Eukaryota
Contig2075	Cucumis melo genomic chromosome, chr_11	87.179	213	1.15e-50	3656	Cucumis melo	muskmelon	Eukaryota
Contig2076	Cucumis melo genomic chromosome, chr_3	87.186	429	1.05e-115	3656	Cucumis melo	muskmelon	Eukaryota
Contig2078	Cucumis melo genomic chromosome, chr_4	88.235	121	7.16e-23	3656	Cucumis melo	muskmelon	Eukaryota
Contig2079	Cucumis melo genomic chromosome, chr_10	88.261	532	7.76e-147	3656	Cucumis melo	muskmelon	Eukaryota
Contig2080	Cucumis melo genomic chromosome, chr_9	93.559	440	4.84e-119	3656	Cucumis melo	muskmelon	Eukaryota
Contig2082	Cucumis melo genomic chromosome, chr_11	91.864	525	1.3e-144	3656	Cucumis melo	muskmelon	Eukaryota
Contig2084	Cucumis melo genomic scaffold, unassembled_sequence31049	81.579	259	1.45e-64	3656	Cucumis melo	muskmelon	Eukaryota
Contig2086	Cucumis melo genomic chromosome, chr_7	87.986	318	2.36e-82	3656	Cucumis melo	muskmelon	Eukaryota
Contig2088	Cucumis melo genomic scaffold, unassembled_sequence31283	86.931	534	2.16e-147	3656	Cucumis melo	muskmelon	Eukaryota
Contig2089	Cucumis melo cultivar Vedrantais Prv splice variant B (Prv) gene, complete cds	88.71	298	3.08e-76	3656	Cucumis melo	muskmelon	Eukaryota
Contig2090	Cucumis melo genomic chromosome, chr_1	77.374	189	1.93e-43	3656	Cucumis melo	muskmelon	Eukaryota
Contig2093	Cucumis melo genomic chromosome, chr_1	81.762	379	1.07e-100	3656	Cucumis melo	muskmelon	Eukaryota
Contig2095	Cucumis melo genomic chromosome, chr_2	96.35	224	5.3e-54	3656	Cucumis melo	muskmelon	Eukaryota
Contig2096	Cucumis melo genomic chromosome, chr_7	94.958	185	2.5e-42	3656	Cucumis melo	muskmelon	Eukaryota
Contig2097	Cucumis melo genomic chromosome, chr_8	76.667	254	6.75e-63	3656	Cucumis melo	muskmelon	Eukaryota
Contig2098	Cucumis melo genomic chromosome, chr_2	84.518	366	8.31e-97	3656	Cucumis melo	muskmelon	Eukaryota
Contig2099	Cucumis melo genomic chromosome, chr_5	88	147	1.18e-30	3656	Cucumis melo	muskmelon	Eukaryota
Contig2101	Cucumis melo genomic chromosome, chr_7	86.744	381	2.97e-101	3656	Cucumis melo	muskmelon	Eukaryota
Contig2102	Cucumis melo genomic chromosome, chr_1	88.689	451	2.23e-122	3656	Cucumis melo	muskmelon	Eukaryota
Contig2104	Cucumis melo genomic chromosome, chr_4	89.439	368	2.31e-97	3656	Cucumis melo	muskmelon	Eukaryota
Contig2105	Cucumis melo genomic scaffold, unanchored_scaffold00564	92.873	647	0	3656	Cucumis melo	muskmelon	Eukaryota
Contig2107	Cucumis melo genomic chromosome, chr_7	79.233	206	1.91e-48	3656	Cucumis melo	muskmelon	Eukaryota
Contig2109	Cucumis melo genomic chromosome, chr_11	84.866	320	6.54e-83	3656	Cucumis melo	muskmelon	Eukaryota
Contig2111	Cucumis melo genomic chromosome, chr_7	82.471	274	5.16e-69	3656	Cucumis melo	muskmelon	Eukaryota
Contig2112	Cucumis melo genomic chromosome, chr_4	87.204	233	8.76e-57	3656	Cucumis melo	muskmelon	Eukaryota
Contig2113	Cucumis melo genomic chromosome, chr_12	84.689	198	3.19e-46	3656	Cucumis melo	muskmelon	Eukaryota
Contig2114	Cucumis melo genomic chromosome, chr_8	86.061	331	3.02e-86	3656	Cucumis melo	muskmelon	Eukaryota
Contig2116	Cucumis melo genomic chromosome, chr_2	91.521	992	0	3656	Cucumis melo	muskmelon	Eukaryota
Contig2117	Cucumis melo genomic chromosome, chr_8	87.599	425	1.34e-114	3656	Cucumis melo	muskmelon	Eukaryota
Contig2118	Cucumis melo genomic chromosome, chr_5	80.716	353	6.44e-93	3656	Cucumis melo	muskmelon	Eukaryota
Contig2119	Cucumis melo genomic chromosome, chr_5	83.19	191	5.34e-44	3656	Cucumis melo	muskmelon	Eukaryota
Contig2120	Cucumis melo genomic chromosome, chr_8	85.912	442	1.34e-119	3656	Cucumis melo	muskmelon	Eukaryota
Contig2122	Cucumis melo genomic chromosome, chr_5	83.131	529	9.96e-146	3656	Cucumis melo	muskmelon	Eukaryota
Contig2123	Cucumis melo genomic chromosome, chr_1	84.091	612	9.62e-171	3656	Cucumis melo	muskmelon	Eukaryota
Contig2124	Cucumis melo genomic chromosome, chr_3	91.608	193	1.48e-44	3656	Cucumis melo	muskmelon	Eukaryota
Contig2125	Cucumis melo genomic chromosome, chr_11	90.909	1199	0	3656	Cucumis melo	muskmelon	Eukaryota
Contig2126	Cucumis melo genomic chromosome, chr_5	82.7	577	3.51e-160	3656	Cucumis melo	muskmelon	Eukaryota
Contig2128	Cucumis melo genomic chromosome, chr_1	86.282	597	2.69e-166	3656	Cucumis melo	muskmelon	Eukaryota
Contig2129	Cucumis melo genomic chromosome, chr_3	90.017	776	0	3656	Cucumis melo	muskmelon	Eukaryota
Contig2130	Cucumis melo genomic chromosome, chr_8	80.093	702	0	3656	Cucumis melo	muskmelon	Eukaryota
Contig2131	Cucumis melo genomic chromosome, chr_3	88.705	440	4.8e-119	3656	Cucumis melo	muskmelon	Eukaryota
Contig2132	Cucumis melo genomic chromosome, chr_6	88.148	159	1.5e-34	3656	Cucumis melo	muskmelon	Eukaryota
Contig2133	Cucumis melo genomic chromosome, chr_1	98.734	139	1.96e-28	3656	Cucumis melo	muskmelon	Eukaryota
Contig2134	Cucumis melo genomic chromosome, chr_9	90.433	970	0	3656	Cucumis melo	muskmelon	Eukaryota
Contig2135	Cucumis melo genomic scaffold, unanchored_scaffold00439	88.77	222	1.89e-53	3656	Cucumis melo	muskmelon	Eukaryota
Contig2137	Cucumis melo genomic chromosome, chr_5	90.196	390	4.9e-104	3656	Cucumis melo	muskmelon	Eukaryota
Contig2138	Cucumis melo genomic chromosome, chr_7	84.826	1175	0	3656	Cucumis melo	muskmelon	Eukaryota
Contig2139	Cucumis melo genomic chromosome, chr_12	91.942	1332	0	3656	Cucumis melo	muskmelon	Eukaryota
Contig2141	Cucumis melo genomic chromosome, chr_8	89.583	244	4.03e-60	3656	Cucumis melo	muskmelon	Eukaryota
Contig2142	Cucumis melo genomic chromosome, chr_8	87.524	586	5.81e-163	3656	Cucumis melo	muskmelon	Eukaryota
Contig2143	Cucumis melo genomic chromosome, chr_12	86.054	608	1.24e-169	3656	Cucumis melo	muskmelon	Eukaryota
Contig2144	Cucumis melo genomic chromosome, chr_2	84.293	691	0	3656	Cucumis melo	muskmelon	Eukaryota
Contig2145	Cucumis melo genomic chromosome, chr_11	92.593	1700	0	3656	Cucumis melo	muskmelon	Eukaryota
Contig2146	Cucumis melo genomic chromosome, chr_1	83.956	396	1.05e-105	3656	Cucumis melo	muskmelon	Eukaryota
Contig2147	Cucumis melo genomic chromosome, chr_12	93.548	553	5.89e-153	3656	Cucumis melo	muskmelon	Eukaryota
Contig2148	Cucumis melo genomic chromosome, chr_1	85.993	309	1.41e-79	3656	Cucumis melo	muskmelon	Eukaryota
Contig2149	Cucumis melo genomic chromosome, chr_6	84.158	383	8.17e-102	3656	Cucumis melo	muskmelon	Eukaryota
Contig2150	Cucumis melo genomic chromosome, chr_3	92.593	154	6.97e-33	3656	Cucumis melo	muskmelon	Eukaryota
Contig2151	Cucumis melo genomic chromosome, chr_8	84.932	366	8.22e-97	3656	Cucumis melo	muskmelon	Eukaryota
Contig2153	Cucumis melo genomic chromosome, chr_11	79.947	255	1.86e-63	3656	Cucumis melo	muskmelon	Eukaryota
Contig2154	Cucumis melo genomic chromosome, chr_6	82.143	195	4.1e-45	3656	Cucumis melo	muskmelon	Eukaryota
Contig2155	Cucumis melo genomic chromosome, chr_10	91.422	1151	0	3656	Cucumis melo	muskmelon	Eukaryota
Contig2156	Cucumis melo genomic chromosome, chr_6	83.186	193	1.48e-44	3656	Cucumis melo	muskmelon	Eukaryota
Contig2157	Cucumis melo genomic chromosome, chr_8	81.463	455	1.7e-123	3656	Cucumis melo	muskmelon	Eukaryota
Contig2158	Cucumis melo genomic chromosome, chr_3	85.079	320	6.49e-83	3656	Cucumis melo	muskmelon	Eukaryota
Contig2159	Cucumis melo genomic chromosome, chr_7	89.884	435	2.22e-117	3656	Cucumis melo	muskmelon	Eukaryota
Contig2160	Cucumis melo genomic chromosome, chr_1	86.548	429	1.03e-115	3656	Cucumis melo	muskmelon	Eukaryota
Contig2161	Cucumis melo genomic chromosome, chr_12	82.234	320	6.48e-83	3656	Cucumis melo	muskmelon	Eukaryota
Contig2162	Cucumis melo genomic chromosome, chr_1	83.469	311	3.9e-80	3656	Cucumis melo	muskmelon	Eukaryota
Contig2163	Cucumis melo genomic chromosome, chr_3	84.53	178	4.13e-40	3656	Cucumis melo	muskmelon	Eukaryota
Contig2164	Cucumis melo genomic chromosome, chr_4	92.364	771	0	3656	Cucumis melo	muskmelon	Eukaryota
Contig2165	Cucumis melo genomic chromosome, chr_10	86.207	154	6.95e-33	3656	Cucumis melo	muskmelon	Eukaryota
Contig2167	Cucumis melo genomic chromosome, chr_5	85.428	1162	0	3656	Cucumis melo	muskmelon	Eukaryota
Contig2168	Cucumis melo genomic chromosome, chr_1	85.679	1212	0	3656	Cucumis melo	muskmelon	Eukaryota
Contig2169	Cucumis melo genomic chromosome, chr_7	85.792	189	1.9e-43	3656	Cucumis melo	muskmelon	Eukaryota
Contig2170	Cucumis melo genomic chromosome, chr_1	90.634	981	0	3656	Cucumis melo	muskmelon	Eukaryota
Contig2171	Cucumis melo genomic chromosome, chr_4	94.681	872	0	3656	Cucumis melo	muskmelon	Eukaryota
Contig2172	Cucumis melo genomic chromosome, chr_10	86.556	697	0	3656	Cucumis melo	muskmelon	Eukaryota
Contig2173	Cucumis melo genomic chromosome, chr_9	79.557	283	8.48e-72	3656	Cucumis melo	muskmelon	Eukaryota
Contig2174	Cucumis melo genomic chromosome, chr_11	86.279	453	6.11e-123	3656	Cucumis melo	muskmelon	Eukaryota
Contig2175	Cucumis melo genomic chromosome, chr_10	84.559	248	3.09e-61	3656	Cucumis melo	muskmelon	Eukaryota
Contig2176	Cucumis melo genomic chromosome, chr_3	81.126	215	3.14e-51	3656	Cucumis melo	muskmelon	Eukaryota
Contig2177	Cucumis melo genomic chromosome, chr_6	91.57	460	3.65e-125	3656	Cucumis melo	muskmelon	Eukaryota
Contig2178	Cucumis melo genomic chromosome, chr_4	90.896	924	0	3656	Cucumis melo	muskmelon	Eukaryota
Contig2179	Cucumis melo genomic chromosome, chr_11	88.339	333	8.3e-87	3656	Cucumis melo	muskmelon	Eukaryota
Contig2180	Cucumis melo genomic chromosome, chr_3	85.531	309	1.4e-79	3656	Cucumis melo	muskmelon	Eukaryota
Contig2181	Cucumis melo genomic chromosome, chr_3	82.143	468	2.18e-127	3656	Cucumis melo	muskmelon	Eukaryota
Contig2182	Cucumis melo genomic chromosome, chr_2	83.988	289	1.82e-73	3656	Cucumis melo	muskmelon	Eukaryota
Contig2183	Cucumis melo genomic chromosome, chr_12	82.11	176	1.48e-39	3656	Cucumis melo	muskmelon	Eukaryota
Contig2184	Cucumis melo genomic scaffold, unassembled_sequence34972	81.092	183	8.84e-42	3656	Cucumis melo	muskmelon	Eukaryota
Contig2185	Cucumis melo genomic chromosome, chr_9	87.368	207	5.24e-49	3656	Cucumis melo	muskmelon	Eukaryota
Contig2186	Cucumis melo genomic chromosome, chr_5	92.444	638	1.57e-178	3656	Cucumis melo	muskmelon	Eukaryota
Contig2187	Cucumis melo genomic chromosome, chr_12	84.615	483	7.77e-132	3656	Cucumis melo	muskmelon	Eukaryota
Contig2189	Cucumis melo genomic chromosome, chr_10	77.219	390	4.85e-104	3656	Cucumis melo	muskmelon	Eukaryota
Contig2193	Cucumis melo genomic chromosome, chr_6	95.175	355	1.77e-93	3656	Cucumis melo	muskmelon	Eukaryota
Contig2194	Cucumis melo genomic chromosome, chr_9	82.988	211	4.05e-50	3656	Cucumis melo	muskmelon	Eukaryota
Contig2196	Cucumis melo genomic chromosome, chr_5	89.013	1175	0	3656	Cucumis melo	muskmelon	Eukaryota
Contig2198	Cucumis melo genomic chromosome, chr_8	89.259	327	3.85e-85	3656	Cucumis melo	muskmelon	Eukaryota
Contig2199	Cucumis melo genomic chromosome, chr_5	81.347	300	8.39e-77	3656	Cucumis melo	muskmelon	Eukaryota
Contig2200	Cucumis melo genomic chromosome, chr_4	78.774	135	2.5e-27	3656	Cucumis melo	muskmelon	Eukaryota
Contig2202	Cucumis melo genomic chromosome, chr_3	87.535	776	0	3656	Cucumis melo	muskmelon	Eukaryota
Contig2203	Cucumis melo genomic chromosome, chr_7	77.041	300	8.39e-77	3656	Cucumis melo	muskmelon	Eukaryota
Contig2204	Cucumis melo genomic chromosome, chr_7	92.974	885	0	3656	Cucumis melo	muskmelon	Eukaryota
Contig2205	Cucumis melo genomic chromosome, chr_7	89.623	536	5.87e-148	3656	Cucumis melo	muskmelon	Eukaryota
Contig2206	Cucumis melo genomic chromosome, chr_12	84.887	1157	0	3656	Cucumis melo	muskmelon	Eukaryota
Contig2207	Cucumis melo genomic chromosome, chr_7	86.966	475	1.3e-129	3656	Cucumis melo	muskmelon	Eukaryota
Contig2208	Cucumis melo genomic chromosome, chr_12	81.405	363	1.05e-95	3656	Cucumis melo	muskmelon	Eukaryota
Contig2209	Cucumis melo genomic chromosome, chr_4	91.557	719	0	3656	Cucumis melo	muskmelon	Eukaryota
Contig2212	Cucumis melo genomic chromosome, chr_2	81.784	398	2.89e-106	3656	Cucumis melo	muskmelon	Eukaryota
Contig2213	Cucumis melo genomic chromosome, chr_7	87.755	387	6.25e-103	3656	Cucumis melo	muskmelon	Eukaryota
Contig2214	Cucumis melo genomic chromosome, chr_3	74.16	182	3.16e-41	3656	Cucumis melo	muskmelon	Eukaryota
Contig2217	Cucumis melo genomic chromosome, chr_5	85.829	374	4.86e-99	3656	Cucumis melo	muskmelon	Eukaryota
Contig2218	Cucumis melo genomic chromosome, chr_4	91.176	265	3.05e-66	3656	Cucumis melo	muskmelon	Eukaryota
Contig2219	Cucumis melo genomic chromosome, chr_11	88.889	315	2.99e-81	3656	Cucumis melo	muskmelon	Eukaryota
Contig2220	Cucumis melo genomic scaffold, unanchored_scaffold00577	91.718	660	0	3656	Cucumis melo	muskmelon	Eukaryota
Contig2221	Cucumis melo genomic chromosome, chr_2	89.655	424	4.76e-114	3656	Cucumis melo	muskmelon	Eukaryota
Contig2223	Cucumis melo genomic chromosome, chr_1	78.403	427	3.67e-115	3656	Cucumis melo	muskmelon	Eukaryota
Contig2224	Cucumis melo genomic chromosome, chr_1	86.156	715	0	3656	Cucumis melo	muskmelon	Eukaryota
Contig2225	Cucumis melo genomic chromosome, chr_2	87.052	396	1.04e-105	3656	Cucumis melo	muskmelon	Eukaryota
Contig2226	Cucumis melo genomic chromosome, chr_3	83.333	375	1.35e-99	3656	Cucumis melo	muskmelon	Eukaryota
Contig2227	Cucumis melo genomic chromosome, chr_8	84.354	802	0	3656	Cucumis melo	muskmelon	Eukaryota
Contig2228	Cucumis melo genomic chromosome, chr_10	85.203	403	6.19e-108	3656	Cucumis melo	muskmelon	Eukaryota
Contig2229	Cucumis melo genomic chromosome, chr_6	78.244	137	6.93e-28	3656	Cucumis melo	muskmelon	Eukaryota
Contig2230	Cucumis melo genomic chromosome, chr_9	81.964	390	4.82e-104	3656	Cucumis melo	muskmelon	Eukaryota
Contig2232	Cucumis melo genomic scaffold, unanchored_scaffold00748	82.5	239	1.84e-58	3656	Cucumis melo	muskmelon	Eukaryota
Contig2233	Cucumis melo genomic chromosome, chr_7	87.77	159	1.48e-34	3656	Cucumis melo	muskmelon	Eukaryota
Contig2234	Cucumis melo genomic chromosome, chr_2	90.698	115	3.24e-21	3656	Cucumis melo	muskmelon	Eukaryota
Contig2235	Cucumis melo genomic chromosome, chr_10	94.792	595	9.5e-166	3656	Cucumis melo	muskmelon	Eukaryota
Contig2238	Cucumis melo genomic chromosome, chr_5	84.036	704	0	3656	Cucumis melo	muskmelon	Eukaryota
Contig2239	Cucumis melo genomic chromosome, chr_5	79.774	632	7.24e-177	3656	Cucumis melo	muskmelon	Eukaryota
Contig2240	Cucumis melo genomic chromosome, chr_10	89.5	244	3.96e-60	3656	Cucumis melo	muskmelon	Eukaryota
Contig2241	Cucumis melo genomic scaffold, unassembled_sequence38209	87.578	178	4.08e-40	3656	Cucumis melo	muskmelon	Eukaryota
Contig2244	Cucumis melo genomic chromosome, chr_7	81.838	355	1.75e-93	3656	Cucumis melo	muskmelon	Eukaryota
Contig2245	Cucumis melo genomic chromosome, chr_3	83.394	237	6.62e-58	3656	Cucumis melo	muskmelon	Eukaryota
Contig2246	Cucumis melo genomic chromosome, chr_9	91.667	165	3.17e-36	3656	Cucumis melo	muskmelon	Eukaryota
Contig2247	Cucumis melo genomic chromosome, chr_12	78.956	361	3.76e-95	3656	Cucumis melo	muskmelon	Eukaryota
Contig2248	Cucumis melo genomic chromosome, chr_8	80.694	326	1.37e-84	3656	Cucumis melo	muskmelon	Eukaryota
Contig2249	Cucumis melo genomic chromosome, chr_6	84.672	130	1.15e-25	3656	Cucumis melo	muskmelon	Eukaryota
Contig2251	Cucumis melo genomic chromosome, chr_3	91.085	688	0	3656	Cucumis melo	muskmelon	Eukaryota
Contig2252	Cucumis melo genomic chromosome, chr_6	86.538	220	6.65e-53	3656	Cucumis melo	muskmelon	Eukaryota
Contig2253	Cucumis melo genomic chromosome, chr_3	81.405	355	1.75e-93	3656	Cucumis melo	muskmelon	Eukaryota
Contig2254	Cucumis melo genomic chromosome, chr_7	95.792	645	0	3656	Cucumis melo	muskmelon	Eukaryota
Contig2255	Cucumis melo genomic scaffold, unanchored_scaffold01469	79.596	339	1.76e-88	3656	Cucumis melo	muskmelon	Eukaryota
Contig2256	Cucumis melo genomic chromosome, chr_11	89.431	154	6.84e-33	3656	Cucumis melo	muskmelon	Eukaryota
Contig2257	Cucumis melo genomic chromosome, chr_11	92.48	693	0	3656	Cucumis melo	muskmelon	Eukaryota
Contig2258	Cucumis melo genomic chromosome, chr_5	94.304	239	1.83e-58	3656	Cucumis melo	muskmelon	Eukaryota
Contig2261	Cucumis melo genomic chromosome, chr_11	88.344	379	1.04e-100	3656	Cucumis melo	muskmelon	Eukaryota
Contig2262	Cucumis melo genomic chromosome, chr_4	82.258	154	6.83e-33	3656	Cucumis melo	muskmelon	Eukaryota
Contig2263	Cucumis melo genomic chromosome, chr_12	88.35	119	2.49e-22	3656	Cucumis melo	muskmelon	Eukaryota
Contig2265	Cucumis melo genomic chromosome, chr_11	81.106	320	6.36e-83	3656	Cucumis melo	muskmelon	Eukaryota
Contig2266	Cucumis melo genomic chromosome, chr_8	81.803	939	0	3656	Cucumis melo	muskmelon	Eukaryota
Contig2267	Cucumis melo genomic chromosome, chr_2	89.356	869	0	3656	Cucumis melo	muskmelon	Eukaryota
Contig2268	Cucumis melo genomic chromosome, chr_11	87.678	479	9.91e-131	3656	Cucumis melo	muskmelon	Eukaryota
Contig2269	Cucumis melo genomic chromosome, chr_9	79.011	490	4.58e-134	3656	Cucumis melo	muskmelon	Eukaryota
Contig2270	Cucumis melo genomic chromosome, chr_12	85.827	398	2.86e-106	3656	Cucumis melo	muskmelon	Eukaryota
Contig2271	Cucumis melo genomic chromosome, chr_2	79.042	202	2.4e-47	3656	Cucumis melo	muskmelon	Eukaryota
Contig2272	Cucumis melo genomic chromosome, chr_2	99.559	414	2.84e-111	3656	Cucumis melo	muskmelon	Eukaryota
Contig2274	Cucumis melo genomic chromosome, chr_4	79.61	381	2.87e-101	3656	Cucumis melo	muskmelon	Eukaryota
Contig2276	Cucumis melo genomic chromosome, chr_8	90.311	1083	0	3656	Cucumis melo	muskmelon	Eukaryota
Contig2277	Cucumis melo genomic chromosome, chr_4	79.156	233	8.51e-57	3656	Cucumis melo	muskmelon	Eukaryota
Contig2280	Cucumis melo genomic chromosome, chr_3	90.751	226	1.42e-54	3656	Cucumis melo	muskmelon	Eukaryota
Contig2281	Cucumis melo genomic chromosome, chr_1	80.78	564	2.66e-156	3656	Cucumis melo	muskmelon	Eukaryota
Contig2282	Cucumis melo genomic chromosome, chr_5	81.043	154	6.81e-33	3656	Cucumis melo	muskmelon	Eukaryota
Contig2283	Cucumis melo genomic chromosome, chr_5	78.333	279	1.08e-70	3656	Cucumis melo	muskmelon	Eukaryota
Contig2284	Cucumis melo genomic chromosome, chr_1	87.245	883	0	3656	Cucumis melo	muskmelon	Eukaryota
Contig2285	Cucumis melo genomic chromosome, chr_3	86.611	254	6.52e-63	3656	Cucumis melo	muskmelon	Eukaryota
Contig2287	Cucumis melo genomic chromosome, chr_1	88.793	420	6.07e-113	3656	Cucumis melo	muskmelon	Eukaryota
Contig2288	Cucumis melo genomic chromosome, chr_12	91.031	593	3.38e-165	3656	Cucumis melo	muskmelon	Eukaryota
Contig2289	Cucumis melo genomic chromosome, chr_12	91.44	346	1.05e-90	3656	Cucumis melo	muskmelon	Eukaryota
Contig2290	Cucumis melo genomic chromosome, chr_5	86.035	407	4.72e-109	3656	Cucumis melo	muskmelon	Eukaryota
Contig2291	Cucumis melo genomic chromosome, chr_12	93.867	1749	0	3656	Cucumis melo	muskmelon	Eukaryota
Contig2292	Cucumis melo genomic chromosome, chr_9	83.83	217	8.54e-52	3656	Cucumis melo	muskmelon	Eukaryota
Contig2293	Cucumis melo genomic chromosome, chr_6	85.35	307	4.93e-79	3656	Cucumis melo	muskmelon	Eukaryota
Contig2295	Cucumis melo genomic chromosome, chr_4	94.417	630	2.57e-176	3656	Cucumis melo	muskmelon	Eukaryota
Contig2296	Cucumis melo genomic chromosome, chr_11	91.716	1158	0	3656	Cucumis melo	muskmelon	Eukaryota
Contig2297	Cucumis melo genomic chromosome, chr_9	85.669	326	1.36e-84	3656	Cucumis melo	muskmelon	Eukaryota
Contig2298	Cucumis melo genomic chromosome, chr_5	91.429	189	1.86e-43	3656	Cucumis melo	muskmelon	Eukaryota
Contig2301	Cucumis melo genomic chromosome, chr_9	73.485	200	8.59e-47	3656	Cucumis melo	muskmelon	Eukaryota
Contig2302	Cucumis melo genomic chromosome, chr_8	89.452	1476	0	3656	Cucumis melo	muskmelon	Eukaryota
Contig2303	Cucumis melo genomic chromosome, chr_12	92.032	351	2.24e-92	3656	Cucumis melo	muskmelon	Eukaryota
Contig2304	Cucumis melo genomic chromosome, chr_5	85.155	593	3.37e-165	3656	Cucumis melo	muskmelon	Eukaryota
Contig2306	Cucumis melo genomic chromosome, chr_10	81.262	767	0	3656	Cucumis melo	muskmelon	Eukaryota
Contig2307	Cucumis melo genomic chromosome, chr_11	82.481	499	7.56e-137	3656	Cucumis melo	muskmelon	Eukaryota
Contig2308	Cucumis melo genomic chromosome, chr_11	83.789	453	5.97e-123	3656	Cucumis melo	muskmelon	Eukaryota
Contig2310	Cucumis melo genomic chromosome, chr_6	85.112	399	7.88e-107	3656	Cucumis melo	muskmelon	Eukaryota
Contig2311	Cucumis melo genomic chromosome, chr_10	80.135	211	3.96e-50	3656	Cucumis melo	muskmelon	Eukaryota
Contig2312	Cucumis melo genomic chromosome, chr_7	77.558	318	2.27e-82	3656	Cucumis melo	muskmelon	Eukaryota
Contig2313	Cucumis melo genomic chromosome, chr_5	78.72	372	1.72e-98	3656	Cucumis melo	muskmelon	Eukaryota
Contig2314	Cucumis melo genomic chromosome, chr_11	92.625	654	0	3656	Cucumis melo	muskmelon	Eukaryota
Contig2315	Cucumis melo genomic chromosome, chr_9	84.716	224	5.09e-54	3656	Cucumis melo	muskmelon	Eukaryota
Contig2317	Cucumis melo genomic chromosome, chr_4	93.413	494	3.51e-135	3656	Cucumis melo	muskmelon	Eukaryota
Contig2319	Cucumis melo genomic chromosome, chr_6	82.84	139	1.89e-28	3656	Cucumis melo	muskmelon	Eukaryota
Contig2320	Cucumis melo genomic chromosome, chr_7	86.968	784	0	3656	Cucumis melo	muskmelon	Eukaryota
Contig2321	Cucumis melo genomic chromosome, chr_11	86.538	228	3.93e-55	3656	Cucumis melo	muskmelon	Eukaryota
Contig2323	Cucumis melo genomic chromosome, chr_4	86.387	388	1.7e-103	3656	Cucumis melo	muskmelon	Eukaryota
Contig2324	Cucumis melo genomic chromosome, chr_3	81.633	492	1.26e-134	3656	Cucumis melo	muskmelon	Eukaryota
Contig2325	Cucumis melo genomic chromosome, chr_1	89.791	481	2.73e-131	3656	Cucumis melo	muskmelon	Eukaryota
Contig2327	Cucumis melo genomic chromosome, chr_2	84.896	191	5.15e-44	3656	Cucumis melo	muskmelon	Eukaryota
Contig2328	Cucumis melo genomic chromosome, chr_6	84.366	329	1.05e-85	3656	Cucumis melo	muskmelon	Eukaryota
Contig2329	Cucumis melo genomic chromosome, chr_6	83.631	590	4.34e-164	3656	Cucumis melo	muskmelon	Eukaryota
Contig2330	Cucumis melo genomic chromosome, chr_10	95.213	889	0	3656	Cucumis melo	muskmelon	Eukaryota
Contig2331	Cucumis melo genomic chromosome, chr_3	79.837	246	1.08e-60	3656	Cucumis melo	muskmelon	Eukaryota
Contig2333	Cucumis melo genomic chromosome, chr_12	81.043	302	2.27e-77	3656	Cucumis melo	muskmelon	Eukaryota
Contig2335	Cucumis melo genomic chromosome, chr_11	83.698	747	0	3656	Cucumis melo	muskmelon	Eukaryota
Contig2336	Cucumis melo genomic chromosome, chr_6	88.514	518	2.07e-142	3656	Cucumis melo	muskmelon	Eukaryota
Contig2337	Cucumis melo genomic chromosome, chr_12	83.259	392	1.31e-104	3656	Cucumis melo	muskmelon	Eukaryota
Contig2338	Cucumis melo genomic chromosome, chr_8	86.822	425	1.29e-114	3656	Cucumis melo	muskmelon	Eukaryota
Contig2339	Cucumis melo genomic chromosome, chr_5	88.393	265	2.98e-66	3656	Cucumis melo	muskmelon	Eukaryota
Contig2340	Cucumis melo genomic chromosome, chr_5	77.737	296	1.06e-75	3656	Cucumis melo	muskmelon	Eukaryota
Contig2341	Cucumis melo genomic chromosome, chr_10	95.238	462	9.85e-126	3656	Cucumis melo	muskmelon	Eukaryota
Contig2342	Cucumis melo genomic chromosome, chr_4	90.566	342	1.34e-89	3656	Cucumis melo	muskmelon	Eukaryota
Contig2343	Cucumis melo genomic chromosome, chr_4	85.948	311	3.78e-80	3656	Cucumis melo	muskmelon	Eukaryota
Contig2344	Cucumis melo genomic scaffold, unanchored_scaffold00185	87.571	811	0	3656	Cucumis melo	muskmelon	Eukaryota
Contig2345	Cucumis melo genomic chromosome, chr_6	94.323	351	2.22e-92	3656	Cucumis melo	muskmelon	Eukaryota
Contig2346	Cucumis melo genomic chromosome, chr_11	81.818	610	3.32e-170	3656	Cucumis melo	muskmelon	Eukaryota
Contig2347	Cucumis melo genomic chromosome, chr_1	89.559	833	0	3656	Cucumis melo	muskmelon	Eukaryota
Contig2348	Cucumis melo genomic chromosome, chr_2	81.704	560	3.39e-155	3656	Cucumis melo	muskmelon	Eukaryota
Contig2349	Cucumis melo genomic chromosome, chr_11	84.314	137	6.78e-28	3656	Cucumis melo	muskmelon	Eukaryota
Contig2350	Cucumis melo genomic chromosome, chr_7	88.747	468	2.12e-127	3656	Cucumis melo	muskmelon	Eukaryota
Contig2351	Cucumis melo genomic chromosome, chr_9	89.936	1173	0	3656	Cucumis melo	muskmelon	Eukaryota
Contig2352	Cucumis melo genomic chromosome, chr_7	73.824	154	6.72e-33	3656	Cucumis melo	muskmelon	Eukaryota
Contig2353	Cucumis melo genomic chromosome, chr_6	80.405	331	2.89e-86	3656	Cucumis melo	muskmelon	Eukaryota
Contig2354	Cucumis melo genomic chromosome, chr_11	83.796	200	8.5e-47	3656	Cucumis melo	muskmelon	Eukaryota
Contig2355	Cucumis melo genomic scaffold, unassembled_sequence33414	87.5	226	1.4e-54	3656	Cucumis melo	muskmelon	Eukaryota
Contig2357	Cucumis melo genomic scaffold, unanchored_scaffold00415	89.268	250	8.32e-62	3656	Cucumis melo	muskmelon	Eukaryota
Contig2358	Cucumis melo genomic chromosome, chr_11	83.661	444	3.56e-120	3656	Cucumis melo	muskmelon	Eukaryota
Contig2359	Cucumis melo genomic chromosome, chr_2	82.286	145	4.04e-30	3656	Cucumis melo	muskmelon	Eukaryota
Contig2360	Cucumis melo genomic chromosome, chr_4	81.675	300	8.14e-77	3656	Cucumis melo	muskmelon	Eukaryota
Contig2361	Cucumis melo genomic chromosome, chr_1	89.633	1158	0	3656	Cucumis melo	muskmelon	Eukaryota
Contig2362	Cucumis melo genomic chromosome, chr_8	92.357	215	3.03e-51	3656	Cucumis melo	muskmelon	Eukaryota
Contig2363	Cucumis melo genomic chromosome, chr_8	83.929	154	6.71e-33	3656	Cucumis melo	muskmelon	Eukaryota
Contig2364	Cucumis melo genomic chromosome, chr_1	77.005	296	1.05e-75	3656	Cucumis melo	muskmelon	Eukaryota
Contig2365	Cucumis melo genomic chromosome, chr_1	80.16	335	2.23e-87	3656	Cucumis melo	muskmelon	Eukaryota
Contig2366	Cucumis melo genomic chromosome, chr_11	81.287	246	1.08e-60	3656	Cucumis melo	muskmelon	Eukaryota
Contig2368	Cucumis melo genomic chromosome, chr_1	84.211	409	1.3e-109	3656	Cucumis melo	muskmelon	Eukaryota
Contig2369	Cucumis melo genomic chromosome, chr_2	77.25	296	1.05e-75	3656	Cucumis melo	muskmelon	Eukaryota
Contig2370	Cucumis melo genomic chromosome, chr_7	87.025	497	2.69e-136	3656	Cucumis melo	muskmelon	Eukaryota
Contig2371	Cucumis melo genomic chromosome, chr_11	92.063	259	1.38e-64	3656	Cucumis melo	muskmelon	Eukaryota
Contig2372	Cucumis melo genomic chromosome, chr_1	86.661	1256	0	3656	Cucumis melo	muskmelon	Eukaryota
Contig2373	Cucumis melo genomic chromosome, chr_11	80.619	348	2.86e-91	3656	Cucumis melo	muskmelon	Eukaryota
Contig2374	Cucumis melo genomic chromosome, chr_6	89.511	878	0	3656	Cucumis melo	muskmelon	Eukaryota
Contig2375	Cucumis melo genomic chromosome, chr_9	86.415	285	2.27e-72	3656	Cucumis melo	muskmelon	Eukaryota
Contig2376	Cucumis melo genomic chromosome, chr_10	88.235	357	4.75e-94	3656	Cucumis melo	muskmelon	Eukaryota
Contig2377	Cucumis melo genomic chromosome, chr_3	82.217	713	0	3656	Cucumis melo	muskmelon	Eukaryota
Contig2378	Cucumis melo genomic chromosome, chr_1	92.374	804	0	3656	Cucumis melo	muskmelon	Eukaryota
Contig2379	Cucumis melo genomic chromosome, chr_9	85.011	448	2.74e-121	3656	Cucumis melo	muskmelon	Eukaryota
Contig2381	Cucumis melo genomic chromosome, chr_8	75.69	254	6.41e-63	3656	Cucumis melo	muskmelon	Eukaryota
Contig2382	Cucumis melo genomic chromosome, chr_8	91.791	366	7.89e-97	3656	Cucumis melo	muskmelon	Eukaryota
Contig2384	Cucumis melo genomic chromosome, chr_2	88.192	619	5.48e-173	3656	Cucumis melo	muskmelon	Eukaryota
Contig2385	Cucumis melo genomic scaffold, unassembled_sequence38450	90.323	121	6.78e-23	3656	Cucumis melo	muskmelon	Eukaryota
Contig2386	Cucumis melo genomic chromosome, chr_2	75.724	191	5.09e-44	3656	Cucumis melo	muskmelon	Eukaryota
Contig2387	Cucumis melo genomic chromosome, chr_6	81.538	342	1.33e-89	3656	Cucumis melo	muskmelon	Eukaryota
Contig2388	Cucumis melo genomic chromosome, chr_8	94.4	187	6.59e-43	3656	Cucumis melo	muskmelon	Eukaryota
Contig2389	Cucumis melo genomic chromosome, chr_6	83.931	571	1.55e-158	3656	Cucumis melo	muskmelon	Eukaryota
Contig2390	Cucumis melo genomic chromosome, chr_3	89.308	588	1.54e-163	3656	Cucumis melo	muskmelon	Eukaryota
Contig2391	Cucumis melo genomic chromosome, chr_10	82.979	117	8.76e-22	3656	Cucumis melo	muskmelon	Eukaryota
Contig2393	Cucumis melo genomic chromosome, chr_10	85.27	942	0	3656	Cucumis melo	muskmelon	Eukaryota
Contig2395	Cucumis melo genomic chromosome, chr_6	90.87	606	4.26e-169	3656	Cucumis melo	muskmelon	Eukaryota
Contig2396	Cucumis melo genomic chromosome, chr_9	86.957	318	2.23e-82	3656	Cucumis melo	muskmelon	Eukaryota
Contig2397	Cucumis melo genomic chromosome, chr_8	94.432	689	0	3656	Cucumis melo	muskmelon	Eukaryota
Contig2398	Cucumis melo genomic scaffold, unassembled_sequence37963	88.722	159	1.43e-34	3656	Cucumis melo	muskmelon	Eukaryota
Contig2399	Cucumis melo genomic chromosome, chr_5	94.004	782	0	3656	Cucumis melo	muskmelon	Eukaryota
Contig2400	Cucumis melo genomic chromosome, chr_6	77.28	335	2.22e-87	3656	Cucumis melo	muskmelon	Eukaryota
Contig2401	Cucumis melo genomic chromosome, chr_6	88.836	745	0	3656	Cucumis melo	muskmelon	Eukaryota
Contig2402	Cucumis melo genomic chromosome, chr_4	87.568	206	1.81e-48	3656	Cucumis melo	muskmelon	Eukaryota
Contig2403	Cucumis melo genomic chromosome, chr_4	84.073	342	1.33e-89	3656	Cucumis melo	muskmelon	Eukaryota
Contig2405	Cucumis melo genomic chromosome, chr_9	84.958	446	9.81e-121	3656	Cucumis melo	muskmelon	Eukaryota
Contig2406	Cucumis melo genomic chromosome, chr_10	80.665	331	2.87e-86	3656	Cucumis melo	muskmelon	Eukaryota
Contig2408	Cucumis melo genomic chromosome, chr_10	80.344	516	7.37e-142	3656	Cucumis melo	muskmelon	Eukaryota
Contig2409	Cucumis melo genomic chromosome, chr_3	85.246	250	8.26e-62	3656	Cucumis melo	muskmelon	Eukaryota
Contig2410	Cucumis melo genomic chromosome, chr_8	88.822	398	2.79e-106	3656	Cucumis melo	muskmelon	Eukaryota
Contig2411	Cucumis melo genomic chromosome, chr_8	81.346	529	9.46e-146	3656	Cucumis melo	muskmelon	Eukaryota
Contig2412	Cucumis melo genomic chromosome, chr_7	95.67	1546	0	3656	Cucumis melo	muskmelon	Eukaryota
Contig2413	Cucumis melo genomic chromosome, chr_4	75.049	442	1.27e-119	3656	Cucumis melo	muskmelon	Eukaryota
Contig2418	Cucumis melo genomic chromosome, chr_2	81.25	375	1.3e-99	3656	Cucumis melo	muskmelon	Eukaryota
Contig2421	Cucumis melo genomic chromosome, chr_3	86.982	187	6.56e-43	3656	Cucumis melo	muskmelon	Eukaryota
Contig2422	Cucumis melo genomic chromosome, chr_10	86.395	316	8.01e-82	3656	Cucumis melo	muskmelon	Eukaryota
Contig2423	Cucumis melo genomic chromosome, chr_8	83.951	224	4.99e-54	3656	Cucumis melo	muskmelon	Eukaryota
Contig2426	Cucumis melo genomic scaffold, unassembled_sequence31959	89.375	195	3.91e-45	3656	Cucumis melo	muskmelon	Eukaryota
Contig2427	Cucumis melo genomic chromosome, chr_6	87.763	604	1.53e-168	3656	Cucumis melo	muskmelon	Eukaryota
Contig2428	Cucumis melo genomic chromosome, chr_7	86.985	512	9.51e-141	3656	Cucumis melo	muskmelon	Eukaryota
Contig2429	Cucumis melo genomic chromosome, chr_5	92.045	492	1.24e-134	3656	Cucumis melo	muskmelon	Eukaryota
Contig2431	Cucumis melo genomic chromosome, chr_9	95.437	418	2.13e-112	3656	Cucumis melo	muskmelon	Eukaryota
Contig2433	Cucumis melo genomic chromosome, chr_6	90.823	412	9.92e-111	3656	Cucumis melo	muskmelon	Eukaryota
Contig2434	Cucumis melo genomic chromosome, chr_1	91.395	582	7.14e-162	3656	Cucumis melo	muskmelon	Eukaryota
Contig2435	Cucumis melo genomic chromosome, chr_4	90.419	427	3.54e-115	3656	Cucumis melo	muskmelon	Eukaryota
Contig2436	Cucumis melo genomic chromosome, chr_9	88.983	145	3.99e-30	3656	Cucumis melo	muskmelon	Eukaryota
Contig2437	Cucumis melo genomic chromosome, chr_2	88.792	957	0	3656	Cucumis melo	muskmelon	Eukaryota
Contig2438	Cucumis melo genomic chromosome, chr_10	85.255	359	1.31e-94	3656	Cucumis melo	muskmelon	Eukaryota
Contig2439	Cucumis melo genomic chromosome, chr_4	85.323	383	7.77e-102	3656	Cucumis melo	muskmelon	Eukaryota
Contig2440	Cucumis melo genomic chromosome, chr_1	84.528	579	9.23e-161	3656	Cucumis melo	muskmelon	Eukaryota
Contig2442	Cucumis melo genomic chromosome, chr_3	80.866	327	3.69e-85	3656	Cucumis melo	muskmelon	Eukaryota
Contig2443	Cucumis melo genomic chromosome, chr_3	89.373	448	2.71e-121	3656	Cucumis melo	muskmelon	Eukaryota
Contig2444	Cucumis melo genomic chromosome, chr_6	95.588	542	1.21e-149	3656	Cucumis melo	muskmelon	Eukaryota
Contig2445	Cucumis melo genomic chromosome, chr_1	92.131	1146	0	3656	Cucumis melo	muskmelon	Eukaryota
Contig2447	Cucumis melo genomic chromosome, chr_3	83.981	758	0	3656	Cucumis melo	muskmelon	Eukaryota
Contig2448	Cucumis melo genomic chromosome, chr_3	83.483	579	9.21e-161	3656	Cucumis melo	muskmelon	Eukaryota
Contig2449	Cucumis melo genomic chromosome, chr_8	75.862	228	3.84e-55	3656	Cucumis melo	muskmelon	Eukaryota
Contig2450	Cucumis melo genomic chromosome, chr_7	92.07	313	1.03e-80	3656	Cucumis melo	muskmelon	Eukaryota
Contig2451	Cucumis melo genomic chromosome, chr_3	94.672	377	3.6e-100	3656	Cucumis melo	muskmelon	Eukaryota
Contig2452	Cucumis melo genomic chromosome, chr_10	93.782	287	6.24e-73	3656	Cucumis melo	muskmelon	Eukaryota
Contig2454	Cucumis melo genomic chromosome, chr_6	84.721	819	0	3656	Cucumis melo	muskmelon	Eukaryota
Contig2455	Cucumis melo genomic chromosome, chr_10	88.274	1066	0	3656	Cucumis melo	muskmelon	Eukaryota
Contig2457	Cucumis melo genomic chromosome, chr_9	93.71	915	0	3656	Cucumis melo	muskmelon	Eukaryota
Contig2460	Cucumis melo genomic chromosome, chr_5	85.609	558	1.2e-154	3656	Cucumis melo	muskmelon	Eukaryota
Contig2461	Cucumis melo genomic chromosome, chr_1	86.957	409	1.28e-109	3656	Cucumis melo	muskmelon	Eukaryota
Contig2462	Cucumis melo genomic chromosome, chr_8	84.824	340	4.72e-89	3656	Cucumis melo	muskmelon	Eukaryota
Contig2463	Cucumis melo genomic chromosome, chr_4	82.243	342	1.31e-89	3656	Cucumis melo	muskmelon	Eukaryota
Contig2464	Cucumis melo genomic chromosome, chr_3	92.032	1578	0	3656	Cucumis melo	muskmelon	Eukaryota
Contig2465	Cucumis melo genomic chromosome, chr_7	90.58	361	3.62e-95	3656	Cucumis melo	muskmelon	Eukaryota
Contig2466	Cucumis melo genomic chromosome, chr_12	78.431	124	5.18e-24	3656	Cucumis melo	muskmelon	Eukaryota
Contig2467	Cucumis melo genomic chromosome, chr_5	85.294	355	1.68e-93	3656	Cucumis melo	muskmelon	Eukaryota
Contig2468	Cucumis melo genomic chromosome, chr_6	84.806	272	1.74e-68	3656	Cucumis melo	muskmelon	Eukaryota
Contig2469	Cucumis melo genomic chromosome, chr_6	92.929	143	1.43e-29	3656	Cucumis melo	muskmelon	Eukaryota
Contig2470	Cucumis melo genomic scaffold, unanchored_scaffold01064	81.768	278	3.75e-70	3656	Cucumis melo	muskmelon	Eukaryota
Contig2471	Cucumis melo genomic chromosome, chr_11	85.893	329	1.02e-85	3656	Cucumis melo	muskmelon	Eukaryota
Contig2472	Cucumis melo genomic chromosome, chr_8	90.773	1127	0	3656	Cucumis melo	muskmelon	Eukaryota
Contig2473	Cucumis melo genomic chromosome, chr_9	79.464	292	1.34e-74	3656	Cucumis melo	muskmelon	Eukaryota
Contig2474	Cucumis melo genomic chromosome, chr_1	88.636	662	0	3656	Cucumis melo	muskmelon	Eukaryota
Contig2475	Cucumis melo genomic chromosome, chr_2	82.305	507	4.39e-139	3656	Cucumis melo	muskmelon	Eukaryota
Contig2476	Cucumis melo genomic chromosome, chr_6	83.429	154	6.59e-33	3656	Cucumis melo	muskmelon	Eukaryota
Contig2477	Cucumis melo genomic chromosome, chr_3	90.946	965	0	3656	Cucumis melo	muskmelon	Eukaryota
Contig2479	Cucumis melo genomic chromosome, chr_7	80.096	407	4.58e-109	3656	Cucumis melo	muskmelon	Eukaryota
Contig2483	Cucumis melo genomic chromosome, chr_11	90.094	950	0	3656	Cucumis melo	muskmelon	Eukaryota
Contig2484	Cucumis melo genomic chromosome, chr_6	78.937	658	0	3656	Cucumis melo	muskmelon	Eukaryota
Contig2485	Cucumis melo genomic chromosome, chr_3	80.416	418	2.11e-112	3656	Cucumis melo	muskmelon	Eukaryota
Contig2486	Cucumis melo genomic chromosome, chr_1	91.15	152	2.37e-32	3656	Cucumis melo	muskmelon	Eukaryota
Contig2487	Cucumis melo genomic chromosome, chr_2	91.362	813	0	3656	Cucumis melo	muskmelon	Eukaryota
Contig2488	Cucumis melo genomic chromosome, chr_9	82.675	392	1.28e-104	3656	Cucumis melo	muskmelon	Eukaryota
Contig2489	Cucumis melo genomic chromosome, chr_7	90.123	1367	0	3656	Cucumis melo	muskmelon	Eukaryota
Contig2490	Cucumis melo genomic chromosome, chr_6	83.908	375	1.29e-99	3656	Cucumis melo	muskmelon	Eukaryota
Contig2491	Cucumis melo genomic chromosome, chr_6	81.407	296	1.03e-75	3656	Cucumis melo	muskmelon	Eukaryota
Contig2492	Cucumis melo genomic chromosome, chr_11	93.385	374	4.63e-99	3656	Cucumis melo	muskmelon	Eukaryota
Contig2494	Cucumis melo genomic chromosome, chr_4	86.312	534	2.01e-147	3656	Cucumis melo	muskmelon	Eukaryota
Contig2495	Cucumis melo genomic chromosome, chr_6	93.714	1038	0	3656	Cucumis melo	muskmelon	Eukaryota
Contig2496	Cucumis melo genomic chromosome, chr_9	80.784	182	3.01e-41	3656	Cucumis melo	muskmelon	Eukaryota
Contig2497	Cucumis melo genomic chromosome, chr_6	88.329	438	1.62e-118	3656	Cucumis melo	muskmelon	Eukaryota
Contig2499	Cucumis melo genomic chromosome, chr_6	79.619	442	1.25e-119	3656	Cucumis melo	muskmelon	Eukaryota
Contig2500	Cucumis melo genomic chromosome, chr_10	86.861	148	3.05e-31	3656	Cucumis melo	muskmelon	Eukaryota
Contig2501	Cucumis melo genomic chromosome, chr_10	91.659	1544	0	3656	Cucumis melo	muskmelon	Eukaryota
Contig2502	Cucumis melo genomic chromosome, chr_11	91.516	754	0	3656	Cucumis melo	muskmelon	Eukaryota
Contig2503	Cucumis melo genomic chromosome, chr_8	86.032	1195	0	3656	Cucumis melo	muskmelon	Eukaryota
Contig2504	Cucumis melo genomic chromosome, chr_10	89.765	580	2.54e-161	3656	Cucumis melo	muskmelon	Eukaryota
Contig2505	Cucumis melo genomic chromosome, chr_9	85.099	281	2.89e-71	3656	Cucumis melo	muskmelon	Eukaryota
Contig2507	Cucumis melo genomic chromosome, chr_2	87.585	486	5.7e-133	3656	Cucumis melo	muskmelon	Eukaryota
Contig2508	Cucumis melo genomic chromosome, chr_8	86.089	396	9.87e-106	3656	Cucumis melo	muskmelon	Eukaryota
Contig2509	Cucumis melo genomic chromosome, chr_2	78.512	499	7.31e-137	3656	Cucumis melo	muskmelon	Eukaryota
Contig2511	Cucumis melo genomic chromosome, chr_11	92.523	449	7.47e-122	3656	Cucumis melo	muskmelon	Eukaryota
Contig2512	Cucumis melo genomic chromosome, chr_9	87.852	739	0	3656	Cucumis melo	muskmelon	Eukaryota
Contig2513	Cucumis melo genomic chromosome, chr_2	93.91	460	3.45e-125	3656	Cucumis melo	muskmelon	Eukaryota
Contig2514	PREDICTED: Cucumis melo putative disease resistance protein RGA4 (LOC103492203), mRNA	86.972	621	1.49e-173	3656	Cucumis melo	muskmelon	Eukaryota
Contig2515	Cucumis melo genomic chromosome, chr_5	83.648	274	4.82e-69	3656	Cucumis melo	muskmelon	Eukaryota
Contig2517	Cucumis melo genomic chromosome, chr_11	81.564	147	1.1e-30	3656	Cucumis melo	muskmelon	Eukaryota
Contig2519	Cucumis melo genomic chromosome, chr_3	82.671	235	2.27e-57	3656	Cucumis melo	muskmelon	Eukaryota
Contig2520	Cucumis melo genomic chromosome, chr_8	87.108	634	1.92e-177	3656	Cucumis melo	muskmelon	Eukaryota
Contig2521	Cucumis melo genomic chromosome, chr_4	85.797	353	6.01e-93	3656	Cucumis melo	muskmelon	Eukaryota
Contig2525	Cucumis melo genomic chromosome, chr_4	82.979	316	7.88e-82	3656	Cucumis melo	muskmelon	Eukaryota
Contig2526	Cucumis melo genomic chromosome, chr_5	92.459	429	9.7e-116	3656	Cucumis melo	muskmelon	Eukaryota
Contig2527	PREDICTED: Cucumis melo probably inactive leucine-rich repeat receptor-like protein kinase At5g48380 (LOC103489743), mRNA	90.076	830	0	3656	Cucumis melo	muskmelon	Eukaryota
Contig2528	Cucumis melo genomic chromosome, chr_8	92.13	1016	0	3656	Cucumis melo	muskmelon	Eukaryota
Contig2529	Cucumis melo genomic chromosome, chr_7	82.781	128	3.96e-25	3656	Cucumis melo	muskmelon	Eukaryota
Contig2530	Cucumis melo genomic chromosome, chr_3	86.546	521	1.55e-143	3656	Cucumis melo	muskmelon	Eukaryota
Contig2532	Cucumis melo genomic chromosome, chr_12	84.345	283	7.99e-72	3656	Cucumis melo	muskmelon	Eukaryota
Contig2533	Cucumis melo genomic chromosome, chr_8	91.829	344	3.61e-90	3656	Cucumis melo	muskmelon	Eukaryota
Contig2534	Cucumis melo genomic chromosome, chr_4	93.048	268	2.24e-67	3656	Cucumis melo	muskmelon	Eukaryota
Contig2536	Cucumis melo genomic chromosome, chr_2	87.77	159	1.4e-34	3656	Cucumis melo	muskmelon	Eukaryota
Contig2538	Cucumis melo genomic chromosome, chr_12	94.144	671	0	3656	Cucumis melo	muskmelon	Eukaryota
Contig2540	Cucumis melo genomic chromosome, chr_10	85.45	416	7.54e-112	3656	Cucumis melo	muskmelon	Eukaryota
Contig2541	Cucumis melo genomic chromosome, chr_8	94.991	839	0	3656	Cucumis melo	muskmelon	Eukaryota
Contig2542	Cucumis melo genomic chromosome, chr_10	82.321	577	3.27e-160	3656	Cucumis melo	muskmelon	Eukaryota
Contig2543	Cucumis melo genomic chromosome, chr_8	80.741	364	2.77e-96	3656	Cucumis melo	muskmelon	Eukaryota
Contig2544	Cucumis melo genomic chromosome, chr_8	83.364	440	4.47e-119	3656	Cucumis melo	muskmelon	Eukaryota
Contig2545	Cucumis melo genomic chromosome, chr_8	79.764	420	5.82e-113	3656	Cucumis melo	muskmelon	Eukaryota
Contig2546	Cucumis melo genomic chromosome, chr_11	86.585	448	2.67e-121	3656	Cucumis melo	muskmelon	Eukaryota
Contig2548	Cucumis melo genomic chromosome, chr_7	87.797	329	1.01e-85	3656	Cucumis melo	muskmelon	Eukaryota
Contig2549	Cucumis melo genomic chromosome, chr_3	79.946	252	2.25e-62	3656	Cucumis melo	muskmelon	Eukaryota
Contig2550	Cucumis melo genomic chromosome, chr_5	73.46	283	7.97e-72	3656	Cucumis melo	muskmelon	Eukaryota
Contig2551	Cucumis melo genomic chromosome, chr_1	88.431	593	3.24e-165	3656	Cucumis melo	muskmelon	Eukaryota
Contig2553	Cucumis melo genomic chromosome, chr_8	87.273	235	2.26e-57	3656	Cucumis melo	muskmelon	Eukaryota
Contig2554	Cucumis melo genomic scaffold, unassembled_sequence34897	84.553	460	3.42e-125	3656	Cucumis melo	muskmelon	Eukaryota
Contig2555	Cucumis melo genomic chromosome, chr_8	87.283	196	1.07e-45	3656	Cucumis melo	muskmelon	Eukaryota
Contig2557	Cucumis melo genomic chromosome, chr_2	91.338	1046	0	3656	Cucumis melo	muskmelon	Eukaryota
Contig2558	Cucumis melo genomic chromosome, chr_4	84.868	291	4.76e-74	3656	Cucumis melo	muskmelon	Eukaryota
Contig2560	Cucumis melo genomic chromosome, chr_2	80.812	211	3.81e-50	3656	Cucumis melo	muskmelon	Eukaryota
Contig2561	Cucumis melo genomic chromosome, chr_1	81.223	361	3.57e-95	3656	Cucumis melo	muskmelon	Eukaryota
Contig2562	Cucumis melo genomic chromosome, chr_5	85.548	608	1.16e-169	3656	Cucumis melo	muskmelon	Eukaryota
Contig2564	Cucumis melo genomic chromosome, chr_8	77.291	135	2.36e-27	3656	Cucumis melo	muskmelon	Eukaryota
Contig2565	Cucumis melo genomic chromosome, chr_8	80.801	435	2.07e-117	3656	Cucumis melo	muskmelon	Eukaryota
Contig2566	Cucumis melo genomic chromosome, chr_11	84.691	281	2.86e-71	3656	Cucumis melo	muskmelon	Eukaryota
Contig2568	Cucumis melo genomic chromosome, chr_9	94.066	1195	0	3656	Cucumis melo	muskmelon	Eukaryota
Contig2569	Cucumis melo genomic chromosome, chr_7	83.087	505	1.56e-138	3656	Cucumis melo	muskmelon	Eukaryota
Contig2570	Cucumis melo genomic chromosome, chr_12	90.253	348	2.78e-91	3656	Cucumis melo	muskmelon	Eukaryota
Contig2571	Cucumis melo genomic chromosome, chr_9	89.802	444	3.45e-120	3656	Cucumis melo	muskmelon	Eukaryota
Contig2573	Cucumis melo genomic chromosome, chr_2	77.949	490	4.36e-134	3656	Cucumis melo	muskmelon	Eukaryota
Contig2575	Cucumis melo genomic chromosome, chr_5	78.561	407	4.52e-109	3656	Cucumis melo	muskmelon	Eukaryota
Contig2576	Cucumis melo genomic chromosome, chr_2	86.015	547	2.55e-151	3656	Cucumis melo	muskmelon	Eukaryota
Contig2578	Cucumis melo genomic chromosome, chr_4	86.645	324	4.68e-84	3656	Cucumis melo	muskmelon	Eukaryota
Contig2579	Cucumis melo genomic chromosome, chr_7	85.909	673	0	3656	Cucumis melo	muskmelon	Eukaryota
Contig2581	Cucumis melo genomic chromosome, chr_6	86.196	335	2.16e-87	3656	Cucumis melo	muskmelon	Eukaryota
Contig2582	Cucumis melo genomic chromosome, chr_7	80.79	403	5.84e-108	3656	Cucumis melo	muskmelon	Eukaryota
Contig2583	Cucumis melo genomic chromosome, chr_2	97.778	774	0	3656	Cucumis melo	muskmelon	Eukaryota
Contig2585	Cucumis melo genomic chromosome, chr_8	87.525	560	3.27e-155	3656	Cucumis melo	muskmelon	Eukaryota
Contig2586	Cucumis melo genomic chromosome, chr_4	84.362	231	2.91e-56	3656	Cucumis melo	muskmelon	Eukaryota
Contig2587	Cucumis melo genomic chromosome, chr_4	86.168	1142	0	3656	Cucumis melo	muskmelon	Eukaryota
Contig2588	Cucumis melo genomic chromosome, chr_10	87.097	368	2.13e-97	3656	Cucumis melo	muskmelon	Eukaryota
Contig2589	Cucumis melo genomic chromosome, chr_10	86.547	241	4.84e-59	3656	Cucumis melo	muskmelon	Eukaryota
Contig2590	Cucumis melo genomic chromosome, chr_1	80.168	514	2.58e-141	3656	Cucumis melo	muskmelon	Eukaryota
Contig2591	Cucumis melo genomic chromosome, chr_6	90.149	425	1.24e-114	3656	Cucumis melo	muskmelon	Eukaryota
Contig2592	Cucumis melo genomic chromosome, chr_4	88.995	252	2.24e-62	3656	Cucumis melo	muskmelon	Eukaryota
Contig2593	Cucumis melo genomic chromosome, chr_2	95.77	532	7.13e-147	3656	Cucumis melo	muskmelon	Eukaryota
Contig2594	Cucumis melo genomic chromosome, chr_1	82.246	204	6.34e-48	3656	Cucumis melo	muskmelon	Eukaryota
Contig2595	Cucumis melo genomic chromosome, chr_10	81.379	220	6.3e-53	3656	Cucumis melo	muskmelon	Eukaryota
Contig2596	Cucumis melo genomic chromosome, chr_1	79.83	315	2.81e-81	3656	Cucumis melo	muskmelon	Eukaryota
Contig2597	Cucumis melo genomic chromosome, chr_11	92.51	697	0	3656	Cucumis melo	muskmelon	Eukaryota
Contig2598	Cucumis melo genomic chromosome, chr_3	82.313	592	1.16e-164	3656	Cucumis melo	muskmelon	Eukaryota
Contig2599	Cucumis melo genomic chromosome, chr_3	77.67	119	2.36e-22	3656	Cucumis melo	muskmelon	Eukaryota
Contig2601	Cucumis melo genomic chromosome, chr_12	85.086	789	0	3656	Cucumis melo	muskmelon	Eukaryota
Contig2602	Cucumis melo genomic chromosome, chr_1	88.053	254	6.2e-63	3656	Cucumis melo	muskmelon	Eukaryota
Contig2603	Cucumis melo genomic chromosome, chr_8	86.188	566	7.02e-157	3656	Cucumis melo	muskmelon	Eukaryota
Contig2604	Cucumis melo genomic chromosome, chr_2	90.047	265	2.87e-66	3656	Cucumis melo	muskmelon	Eukaryota
Contig2605	Cucumis melo genomic chromosome, chr_11	86.752	252	2.23e-62	3656	Cucumis melo	muskmelon	Eukaryota
Contig2606	Cucumis melo genomic chromosome, chr_4	94.505	555	1.52e-153	3656	Cucumis melo	muskmelon	Eukaryota
Contig2608	Cucumis melo genomic chromosome, chr_11	83.631	292	1.31e-74	3656	Cucumis melo	muskmelon	Eukaryota
Contig2609	Cucumis melo genomic chromosome, chr_1	92.481	739	0	3656	Cucumis melo	muskmelon	Eukaryota
Contig2610	PREDICTED: Cucumis melo uncharacterized LOC107990394 (LOC107990394), ncRNA	89.947	243	1.34e-59	3656	Cucumis melo	muskmelon	Eukaryota
Contig2611	Cucumis melo genomic chromosome, chr_5	85.143	172	1.79e-38	3656	Cucumis melo	muskmelon	Eukaryota
Contig2612	Cucumis melo genomic chromosome, chr_1	90.458	333	7.74e-87	3656	Cucumis melo	muskmelon	Eukaryota
Contig2614	Cucumis melo genomic chromosome, chr_1	85.409	560	3.26e-155	3656	Cucumis melo	muskmelon	Eukaryota
Contig2616	Cucumis melo genomic chromosome, chr_12	85.149	508	1.2e-139	3656	Cucumis melo	muskmelon	Eukaryota
Contig2617	Cucumis melo genomic chromosome, chr_9	92.65	1384	0	3656	Cucumis melo	muskmelon	Eukaryota
Contig2618	Cucumis melo genomic chromosome, chr_5	89.189	320	6.02e-83	3656	Cucumis melo	muskmelon	Eukaryota
Contig2620	Cucumis melo genomic chromosome, chr_12	92.637	597	2.48e-166	3656	Cucumis melo	muskmelon	Eukaryota
Contig2621	Cucumis melo genomic chromosome, chr_12	86.228	174	4.95e-39	3656	Cucumis melo	muskmelon	Eukaryota
Contig2622	Cucumis melo genomic chromosome, chr_4	86.079	950	0	3656	Cucumis melo	muskmelon	Eukaryota
Contig2624	Cucumis melo genomic chromosome, chr_6	92.431	617	1.9e-172	3656	Cucumis melo	muskmelon	Eukaryota
Contig2625	Cucumis melo genomic chromosome, chr_1	89.241	375	1.26e-99	3656	Cucumis melo	muskmelon	Eukaryota
Contig2626	Cucumis melo genomic chromosome, chr_6	86.535	544	3.28e-150	3656	Cucumis melo	muskmelon	Eukaryota
Contig2627	Cucumis melo genomic chromosome, chr_8	93.846	287	6.09e-73	3656	Cucumis melo	muskmelon	Eukaryota
Contig2628	Cucumis melo genomic chromosome, chr_10	77.169	122	1.82e-23	3656	Cucumis melo	muskmelon	Eukaryota
Contig2630	Cucumis melo genomic chromosome, chr_2	84.036	287	6.09e-73	3656	Cucumis melo	muskmelon	Eukaryota
Contig2632	Cucumis melo genomic chromosome, chr_2	95.876	470	5.63e-128	3656	Cucumis melo	muskmelon	Eukaryota
Contig2633	Cucumis melo genomic chromosome, chr_1	82.418	289	1.69e-73	3656	Cucumis melo	muskmelon	Eukaryota
Contig2634	Cucumis melo genomic chromosome, chr_9	93.301	309	1.3e-79	3656	Cucumis melo	muskmelon	Eukaryota
Contig2635	Cucumis melo genomic chromosome, chr_5	83.66	274	4.74e-69	3656	Cucumis melo	muskmelon	Eukaryota
Contig2636	Cucumis melo genomic chromosome, chr_2	78.977	414	2.67e-111	3656	Cucumis melo	muskmelon	Eukaryota
Contig2637	Cucumis melo genomic scaffold, unanchored_scaffold01387	90.566	137	6.48e-28	3656	Cucumis melo	muskmelon	Eukaryota
Contig2639	Cucumis melo genomic chromosome, chr_12	86.232	145	3.87e-30	3656	Cucumis melo	muskmelon	Eukaryota
Contig2640	Cucumis melo genomic chromosome, chr_6	88.554	195	3.79e-45	3656	Cucumis melo	muskmelon	Eukaryota
Contig2642	Cucumis melo genomic chromosome, chr_2	84.153	525	1.18e-144	3656	Cucumis melo	muskmelon	Eukaryota
Contig2643	Cucumis melo genomic chromosome, chr_2	93.711	1423	0	3656	Cucumis melo	muskmelon	Eukaryota
Contig2644	Cucumis melo genomic chromosome, chr_2	80	302	2.17e-77	3656	Cucumis melo	muskmelon	Eukaryota
Contig2645	Cucumis melo genomic chromosome, chr_9	87.473	497	2.58e-136	3656	Cucumis melo	muskmelon	Eukaryota
Contig2646	Cucumis melo genomic chromosome, chr_12	93.381	1631	0	3656	Cucumis melo	muskmelon	Eukaryota
Contig2647	Cucumis melo genomic chromosome, chr_12	96.059	329	9.96e-86	3656	Cucumis melo	muskmelon	Eukaryota
Contig2648	Cucumis melo genomic chromosome, chr_6	84	841	0	3656	Cucumis melo	muskmelon	Eukaryota
Contig2649	Cucumis melo genomic chromosome, chr_6	86.25	335	2.14e-87	3656	Cucumis melo	muskmelon	Eukaryota
Contig2651	Cucumis melo genomic chromosome, chr_8	96.124	420	5.74e-113	3656	Cucumis melo	muskmelon	Eukaryota
Contig2652	Cucumis melo genomic chromosome, chr_1	86.585	261	3.68e-65	3656	Cucumis melo	muskmelon	Eukaryota
Contig2653	Cucumis melo genomic chromosome, chr_5	81.237	353	5.9e-93	3656	Cucumis melo	muskmelon	Eukaryota
Contig2654	Cucumis melo genomic chromosome, chr_4	95.082	193	1.36e-44	3656	Cucumis melo	muskmelon	Eukaryota
Contig2655	Cucumis melo genomic chromosome, chr_3	92.061	817	0	3656	Cucumis melo	muskmelon	Eukaryota
Contig2660	Cucumis melo genomic chromosome, chr_7	84.486	486	5.57e-133	3656	Cucumis melo	muskmelon	Eukaryota
Contig2662	Cucumis melo genomic chromosome, chr_1	77.616	503	5.53e-138	3656	Cucumis melo	muskmelon	Eukaryota
Contig2663	Cucumis melo genomic chromosome, chr_5	90	169	2.29e-37	3656	Cucumis melo	muskmelon	Eukaryota
Contig2664	Cucumis melo genomic chromosome, chr_6	86.145	169	2.29e-37	3656	Cucumis melo	muskmelon	Eukaryota
Contig2666	Cucumis melo genomic chromosome, chr_4	88.38	327	3.57e-85	3656	Cucumis melo	muskmelon	Eukaryota
Contig2668	Cucumis melo genomic chromosome, chr_12	92.638	457	4.36e-124	3656	Cucumis melo	muskmelon	Eukaryota
Contig2669	Cucumis melo genomic chromosome, chr_12	89.091	398	2.68e-106	3656	Cucumis melo	muskmelon	Eukaryota
Contig2671	Cucumis melo genomic chromosome, chr_4	82.541	946	0	3656	Cucumis melo	muskmelon	Eukaryota
Contig2672	Cucumis melo genomic chromosome, chr_1	93.86	169	2.29e-37	3656	Cucumis melo	muskmelon	Eukaryota
Contig2673	Cucumis melo genomic chromosome, chr_11	87.521	665	0	3656	Cucumis melo	muskmelon	Eukaryota
Contig2676	Cucumis melo genomic chromosome, chr_2	86.247	448	2.62e-121	3656	Cucumis melo	muskmelon	Eukaryota
Contig2678	Cucumis melo genomic chromosome, chr_8	91.149	1184	0	3656	Cucumis melo	muskmelon	Eukaryota
Contig2679	Cucumis melo genomic chromosome, chr_8	84.99	996	0	3656	Cucumis melo	muskmelon	Eukaryota
Contig2681	Cucumis melo genomic chromosome, chr_3	82.619	335	2.13e-87	3656	Cucumis melo	muskmelon	Eukaryota
Contig2683	Cucumis melo genomic chromosome, chr_9	94.139	407	4.45e-109	3656	Cucumis melo	muskmelon	Eukaryota
Contig2684	Cucumis melo genomic chromosome, chr_11	93.407	135	2.32e-27	3656	Cucumis melo	muskmelon	Eukaryota
Contig2685	Cucumis melo genomic chromosome, chr_6	93.902	243	1.33e-59	3656	Cucumis melo	muskmelon	Eukaryota
Contig2687	Cucumis melo genomic chromosome, chr_9	87.892	243	1.33e-59	3656	Cucumis melo	muskmelon	Eukaryota
Contig2688	Cucumis melo genomic chromosome, chr_11	91.51	1223	0	3656	Cucumis melo	muskmelon	Eukaryota
Contig2690	Cucumis melo genomic chromosome, chr_6	89.431	435	2.04e-117	3656	Cucumis melo	muskmelon	Eukaryota
Contig2691	Cucumis melo genomic chromosome, chr_4	85.599	641	1.12e-179	3656	Cucumis melo	muskmelon	Eukaryota
Contig2692	Cucumis melo genomic chromosome, chr_2	89.552	252	2.2e-62	3656	Cucumis melo	muskmelon	Eukaryota
Contig2696	Cucumis melo genomic chromosome, chr_9	82.633	453	5.62e-123	3656	Cucumis melo	muskmelon	Eukaryota
Contig2697	PREDICTED: Cucumis melo uncharacterized LOC103503017 (LOC103503017), transcript variant X5, mRNA	92.608	693	0	3656	Cucumis melo	muskmelon	Eukaryota
Contig2700	Cucumis melo genomic chromosome, chr_7	85.971	283	7.8e-72	3656	Cucumis melo	muskmelon	Eukaryota
Contig2701	Cucumis melo genomic chromosome, chr_2	87.654	989	0	3656	Cucumis melo	muskmelon	Eukaryota
Contig2702	Cucumis melo genomic chromosome, chr_4	90.13	488	1.54e-133	3656	Cucumis melo	muskmelon	Eukaryota
Contig2703	Cucumis melo genomic chromosome, chr_9	82.619	760	0	3656	Cucumis melo	muskmelon	Eukaryota
Contig2704	Cucumis melo genomic chromosome, chr_6	90.104	231	2.86e-56	3656	Cucumis melo	muskmelon	Eukaryota
Contig2705	Cucumis melo genomic chromosome, chr_2	89.609	1376	0	3656	Cucumis melo	muskmelon	Eukaryota
Contig2706	Cucumis melo genomic chromosome, chr_6	95.017	473	4.3e-129	3656	Cucumis melo	muskmelon	Eukaryota
Contig2707	Cucumis melo genomic chromosome, chr_10	89.13	172	1.76e-38	3656	Cucumis melo	muskmelon	Eukaryota
Contig2710	Cucumis melo genomic chromosome, chr_4	80.306	333	7.62e-87	3656	Cucumis melo	muskmelon	Eukaryota
Contig2711	Cucumis melo genomic chromosome, chr_1	86.705	182	2.92e-41	3656	Cucumis melo	muskmelon	Eukaryota
Contig2713	Cucumis melo genomic chromosome, chr_1	89.72	1384	0	3656	Cucumis melo	muskmelon	Eukaryota
Contig2714	Cucumis melo genomic chromosome, chr_12	84.96	375	1.25e-99	3656	Cucumis melo	muskmelon	Eukaryota
Contig2715	Cucumis melo genomic chromosome, chr_11	86.928	326	1.27e-84	3656	Cucumis melo	muskmelon	Eukaryota
Contig2716	Cucumis melo genomic chromosome, chr_6	88.35	597	2.45e-166	3656	Cucumis melo	muskmelon	Eukaryota
Contig2717	Cucumis melo genomic chromosome, chr_8	83.774	233	7.94e-57	3656	Cucumis melo	muskmelon	Eukaryota
Contig2719	Cucumis melo genomic chromosome, chr_8	88.126	1002	0	3656	Cucumis melo	muskmelon	Eukaryota
Contig2720	Cucumis melo genomic chromosome, chr_12	83.854	673	0	3656	Cucumis melo	muskmelon	Eukaryota
Contig2721	Cucumis melo genomic chromosome, chr_6	80.418	261	3.64e-65	3656	Cucumis melo	muskmelon	Eukaryota
Contig2722	Cucumis melo genomic scaffold, unassembled_sequence31212	95.851	387	5.75e-103	3656	Cucumis melo	muskmelon	Eukaryota
Contig2723	Cucumis melo genomic chromosome, chr_3	78.55	617	1.87e-172	3656	Cucumis melo	muskmelon	Eukaryota
Contig2724	Cucumis melo genomic chromosome, chr_8	93.19	409	1.23e-109	3656	Cucumis melo	muskmelon	Eukaryota
Contig2726	Cucumis melo genomic chromosome, chr_11	83.966	614	2.42e-171	3656	Cucumis melo	muskmelon	Eukaryota
Contig2727	Cucumis melo genomic chromosome, chr_1	84.364	246	1.02e-60	3656	Cucumis melo	muskmelon	Eukaryota
Contig2728	Cucumis melo genomic chromosome, chr_1	79.909	152	2.28e-32	3656	Cucumis melo	muskmelon	Eukaryota
Contig2729	Cucumis melo genomic chromosome, chr_12	92.273	616	6.73e-172	3656	Cucumis melo	muskmelon	Eukaryota
Contig2730	Cucumis melo genomic chromosome, chr_5	91.364	300	7.7e-77	3656	Cucumis melo	muskmelon	Eukaryota
Contig2732	Cucumis melo genomic chromosome, chr_10	84.936	305	1.66e-78	3656	Cucumis melo	muskmelon	Eukaryota
Contig2733	Cucumis melo genomic chromosome, chr_7	89.474	254	6.08e-63	3656	Cucumis melo	muskmelon	Eukaryota
Contig2734	Cucumis melo genomic chromosome, chr_1	88.276	172	1.75e-38	3656	Cucumis melo	muskmelon	Eukaryota
Contig2736	Cucumis melo genomic chromosome, chr_12	81.03	281	2.79e-71	3656	Cucumis melo	muskmelon	Eukaryota
Contig2737	Cucumis melo genomic chromosome, chr_7	81.818	235	2.2e-57	3656	Cucumis melo	muskmelon	Eukaryota
Contig2738	Cucumis melo genomic chromosome, chr_6	82.677	424	4.38e-114	3656	Cucumis melo	muskmelon	Eukaryota
Contig2739	Cucumis melo genomic chromosome, chr_8	92.486	246	1.02e-60	3656	Cucumis melo	muskmelon	Eukaryota
Contig2740	Cucumis melo genomic chromosome, chr_12	85.223	285	2.15e-72	3656	Cucumis melo	muskmelon	Eukaryota
Contig2743	Cucumis melo genomic chromosome, chr_3	83.333	217	7.96e-52	3656	Cucumis melo	muskmelon	Eukaryota
Contig2745	Cucumis melo genomic chromosome, chr_5	88.411	623	4.02e-174	3656	Cucumis melo	muskmelon	Eukaryota
Contig2748	Cucumis melo genomic chromosome, chr_5	80.038	350	7.52e-92	3656	Cucumis melo	muskmelon	Eukaryota
Contig2749	Cucumis melo genomic chromosome, chr_11	76.316	329	9.8e-86	3656	Cucumis melo	muskmelon	Eukaryota
Contig2752	Cucumis melo genomic chromosome, chr_6	87.772	427	3.37e-115	3656	Cucumis melo	muskmelon	Eukaryota
Contig2754	Cucumis melo genomic chromosome, chr_6	97.209	364	2.68e-96	3656	Cucumis melo	muskmelon	Eukaryota
Contig2755	Cucumis melo genomic chromosome, chr_8	90.323	163	1.05e-35	3656	Cucumis melo	muskmelon	Eukaryota
Contig2756	Cucumis melo genomic chromosome, chr_1	94.152	259	1.3e-64	3656	Cucumis melo	muskmelon	Eukaryota
Contig2757	Cucumis melo genomic chromosome, chr_11	90.265	433	7.25e-117	3656	Cucumis melo	muskmelon	Eukaryota
Contig2758	Cucumis melo genomic chromosome, chr_5	87.023	139	1.77e-28	3656	Cucumis melo	muskmelon	Eukaryota
Contig2759	Cucumis melo genomic chromosome, chr_12	82.414	244	3.65e-60	3656	Cucumis melo	muskmelon	Eukaryota
Contig2760	Cucumis melo genomic chromosome, chr_7	91.667	213	1.03e-50	3656	Cucumis melo	muskmelon	Eukaryota
Contig2762	Cucumis melo genomic chromosome, chr_1	83.065	322	1.64e-83	3656	Cucumis melo	muskmelon	Eukaryota
Contig2763	Cucumis melo genomic chromosome, chr_8	90.248	761	0	3656	Cucumis melo	muskmelon	Eukaryota
Contig2764	Cucumis melo genomic chromosome, chr_7	83.019	353	5.8e-93	3656	Cucumis melo	muskmelon	Eukaryota
Contig2765	Cucumis melo genomic chromosome, chr_7	88.571	209	1.33e-49	3656	Cucumis melo	muskmelon	Eukaryota
Contig2766	Cucumis melo genomic scaffold, unanchored_scaffold01236	81.988	387	5.71e-103	3656	Cucumis melo	muskmelon	Eukaryota
Contig2767	Cucumis melo genomic chromosome, chr_9	85.249	556	4.12e-154	3656	Cucumis melo	muskmelon	Eukaryota
Contig2768	Cucumis melo genomic chromosome, chr_4	89.699	1373	0	3656	Cucumis melo	muskmelon	Eukaryota
Contig2769	Cucumis melo genomic chromosome, chr_7	87.421	361	3.46e-95	3656	Cucumis melo	muskmelon	Eukaryota
Contig2770	Cucumis melo genomic chromosome, chr_8	81.967	193	1.34e-44	3656	Cucumis melo	muskmelon	Eukaryota
Contig2771	Cucumis melo genomic chromosome, chr_1	94.364	833	0	3656	Cucumis melo	muskmelon	Eukaryota
Contig2772	Cucumis melo genomic chromosome, chr_12	85.366	169	2.25e-37	3656	Cucumis melo	muskmelon	Eukaryota
Contig2773	Cucumis melo genomic chromosome, chr_1	84.091	501	1.96e-137	3656	Cucumis melo	muskmelon	Eukaryota
Contig2774	Cucumis melo genomic chromosome, chr_4	93.266	435	2.01e-117	3656	Cucumis melo	muskmelon	Eukaryota
Contig2775	Cucumis melo genomic chromosome, chr_7	89.3	628	8.59e-176	3656	Cucumis melo	muskmelon	Eukaryota
Contig2776	Cucumis melo genomic chromosome, chr_5	82.308	549	6.88e-152	3656	Cucumis melo	muskmelon	Eukaryota
Contig2779	Cucumis melo genomic chromosome, chr_2	89.756	261	3.61e-65	3656	Cucumis melo	muskmelon	Eukaryota
Contig2782	Cucumis melo genomic chromosome, chr_3	80.605	278	3.58e-70	3656	Cucumis melo	muskmelon	Eukaryota
Contig2783	Cucumis melo genomic chromosome, chr_4	89.479	1356	0	3656	Cucumis melo	muskmelon	Eukaryota
Contig2784	Cucumis melo genomic scaffold, unassembled_sequence31279	84.9	327	3.51e-85	3656	Cucumis melo	muskmelon	Eukaryota
Contig2785	Cucumis melo genomic chromosome, chr_7	92.667	213	1.02e-50	3656	Cucumis melo	muskmelon	Eukaryota
Contig2788	Cucumis melo genomic chromosome, chr_12	83.582	182	2.89e-41	3656	Cucumis melo	muskmelon	Eukaryota
Contig2789	Cucumis melo genomic chromosome, chr_9	85.957	501	1.95e-137	3656	Cucumis melo	muskmelon	Eukaryota
Contig2790	Cucumis melo genomic chromosome, chr_2	87.726	305	1.64e-78	3656	Cucumis melo	muskmelon	Eukaryota
Contig2791	Cucumis melo genomic chromosome, chr_2	91.765	119	2.29e-22	3656	Cucumis melo	muskmelon	Eukaryota
Contig2794	Cucumis melo genomic chromosome, chr_5	78.512	222	1.7e-53	3656	Cucumis melo	muskmelon	Eukaryota
Contig2797	Cucumis melo genomic chromosome, chr_3	89.72	135	2.28e-27	3656	Cucumis melo	muskmelon	Eukaryota
Contig2799	Cucumis melo genomic chromosome, chr_8	82.743	361	3.45e-95	3656	Cucumis melo	muskmelon	Eukaryota
Contig2800	Cucumis melo genomic chromosome, chr_9	95.578	466	7.1e-127	3656	Cucumis melo	muskmelon	Eukaryota
Contig2801	Cucumis melo genomic chromosome, chr_4	83.386	283	7.68e-72	3656	Cucumis melo	muskmelon	Eukaryota
Contig2802	Cucumis melo genomic chromosome, chr_11	83.844	641	1.1e-179	3656	Cucumis melo	muskmelon	Eukaryota
Contig2805	Cucumis melo genomic chromosome, chr_1	84.89	348	2.68e-91	3656	Cucumis melo	muskmelon	Eukaryota
Contig2807	Cucumis melo genomic chromosome, chr_11	82.88	320	5.84e-83	3656	Cucumis melo	muskmelon	Eukaryota
Contig2808	Cucumis melo genomic chromosome, chr_9	85.561	191	4.78e-44	3656	Cucumis melo	muskmelon	Eukaryota
Contig2809	Cucumis melo genomic chromosome, chr_5	95.393	584	1.88e-162	3656	Cucumis melo	muskmelon	Eukaryota
Contig2810	Cucumis melo genomic chromosome, chr_4	76.128	207	4.75e-49	3656	Cucumis melo	muskmelon	Eukaryota
Contig2811	Cucumis melo genomic chromosome, chr_4	92.216	922	0	3656	Cucumis melo	muskmelon	Eukaryota
Contig2814	Cucumis melo genomic chromosome, chr_12	91.519	381	2.64e-101	3656	Cucumis melo	muskmelon	Eukaryota
Contig2815	Cucumis melo genomic chromosome, chr_2	90.274	1347	0	3656	Cucumis melo	muskmelon	Eukaryota
Contig2817	Cucumis melo genomic chromosome, chr_8	92.5	686	0	3656	Cucumis melo	muskmelon	Eukaryota
Contig2818	Cucumis melo genomic chromosome, chr_12	93.11	1511	0	3656	Cucumis melo	muskmelon	Eukaryota
Contig2819	Cucumis melo genomic chromosome, chr_4	81.016	811	0	3656	Cucumis melo	muskmelon	Eukaryota
Contig2822	Cucumis melo genomic chromosome, chr_12	89.437	695	0	3656	Cucumis melo	muskmelon	Eukaryota
Contig2823	Cucumis melo genomic chromosome, chr_7	85.185	294	3.54e-75	3656	Cucumis melo	muskmelon	Eukaryota
Contig2828	Cucumis melo genomic chromosome, chr_5	83.283	274	4.6e-69	3656	Cucumis melo	muskmelon	Eukaryota
Contig2829	Cucumis melo genomic chromosome, chr_8	85.289	532	6.88e-147	3656	Cucumis melo	muskmelon	Eukaryota
Contig2830	Cucumis melo genomic chromosome, chr_4	90.404	254	5.99e-63	3656	Cucumis melo	muskmelon	Eukaryota
Contig2831	Cucumis melo genomic chromosome, chr_3	80.311	431	2.58e-116	3656	Cucumis melo	muskmelon	Eukaryota
Contig2832	Cucumis melo genomic chromosome, chr_8	81.264	643	3.04e-180	3656	Cucumis melo	muskmelon	Eukaryota
Contig2833	Cucumis melo genomic chromosome, chr_5	93.119	634	1.83e-177	3656	Cucumis melo	muskmelon	Eukaryota
Contig2837	Cucumis melo genomic chromosome, chr_4	82.5	346	9.61e-91	3656	Cucumis melo	muskmelon	Eukaryota
Contig2838	Cucumis melo genomic chromosome, chr_1	84.766	237	6.03e-58	3656	Cucumis melo	muskmelon	Eukaryota
Contig2839	Cucumis melo genomic chromosome, chr_6	92.135	494	3.24e-135	3656	Cucumis melo	muskmelon	Eukaryota
Contig2841	Cucumis melo genomic chromosome, chr_6	86.919	902	0	3656	Cucumis melo	muskmelon	Eukaryota
Contig2843	Cucumis melo genomic chromosome, chr_5	84.483	167	8.02e-37	3656	Cucumis melo	muskmelon	Eukaryota
Contig2845	Cucumis melo genomic chromosome, chr_5	89.96	1247	0	3656	Cucumis melo	muskmelon	Eukaryota
Contig2848	Cucumis melo genomic chromosome, chr_2	89.655	758	0	3656	Cucumis melo	muskmelon	Eukaryota
Contig2849	Cucumis melo genomic scaffold, unassembled_sequence32870	89.941	213	1.01e-50	3656	Cucumis melo	muskmelon	Eukaryota
Contig2850	Cucumis melo genomic chromosome, chr_10	81.661	235	2.17e-57	3656	Cucumis melo	muskmelon	Eukaryota
Contig2851	Cucumis melo genomic chromosome, chr_10	80	171	6.19e-38	3656	Cucumis melo	muskmelon	Eukaryota
Contig2852	Cucumis melo genomic chromosome, chr_12	90.265	289	1.64e-73	3656	Cucumis melo	muskmelon	Eukaryota
Contig2853	Cucumis melo genomic chromosome, chr_1	85.496	261	3.57e-65	3656	Cucumis melo	muskmelon	Eukaryota
Contig2854	Cucumis melo genomic scaffold, unassembled_sequence34855	88.068	196	1.02e-45	3656	Cucumis melo	muskmelon	Eukaryota
Contig2855	Cucumis melo genomic chromosome, chr_9	93.305	699	0	3656	Cucumis melo	muskmelon	Eukaryota
Contig2856	Cucumis melo genomic chromosome, chr_1	80.795	431	2.57e-116	3656	Cucumis melo	muskmelon	Eukaryota
Contig2857	Cucumis melo genomic chromosome, chr_9	88.128	496	8.99e-136	3656	Cucumis melo	muskmelon	Eukaryota
Contig2858	Cucumis melo genomic chromosome, chr_1	84.741	335	2.07e-87	3656	Cucumis melo	muskmelon	Eukaryota
Contig2859	Cucumis melo genomic chromosome, chr_1	87.665	255	1.66e-63	3656	Cucumis melo	muskmelon	Eukaryota
Contig2860	Cucumis melo genomic chromosome, chr_6	93.452	497	2.5e-136	3656	Cucumis melo	muskmelon	Eukaryota
Contig2861	Cucumis melo genomic chromosome, chr_11	87.129	329	9.65e-86	3656	Cucumis melo	muskmelon	Eukaryota
Contig2863	Cucumis melo genomic chromosome, chr_5	89.286	276	1.27e-69	3656	Cucumis melo	muskmelon	Eukaryota
Contig2866	Cucumis melo genomic chromosome, chr_12	92.665	789	0	3656	Cucumis melo	muskmelon	Eukaryota
Contig2867	Cucumis melo genomic chromosome, chr_4	85.495	590	4e-164	3656	Cucumis melo	muskmelon	Eukaryota
Contig2868	Cucumis melo genomic chromosome, chr_4	92.778	255	1.66e-63	3656	Cucumis melo	muskmelon	Eukaryota
Contig2869	Cucumis melo genomic chromosome, chr_11	78.396	274	4.58e-69	3656	Cucumis melo	muskmelon	Eukaryota
Contig2870	Cucumis melo genomic chromosome, chr_11	91.724	592	1.11e-164	3656	Cucumis melo	muskmelon	Eukaryota
Contig2871	Cucumis melo genomic chromosome, chr_4	81.798	348	2.66e-91	3656	Cucumis melo	muskmelon	Eukaryota
Contig2872	Cucumis melo genomic chromosome, chr_6	87.179	261	3.56e-65	3656	Cucumis melo	muskmelon	Eukaryota
Contig2873	Cucumis melo genomic chromosome, chr_6	83.791	326	1.25e-84	3656	Cucumis melo	muskmelon	Eukaryota
Contig2874	Cucumis melo genomic chromosome, chr_12	92.391	128	3.77e-25	3656	Cucumis melo	muskmelon	Eukaryota
Contig2875	Cucumis melo genomic chromosome, chr_7	83.223	394	3.36e-105	3656	Cucumis melo	muskmelon	Eukaryota
Contig2876	Cucumis melo genomic chromosome, chr_9	82.368	315	2.69e-81	3656	Cucumis melo	muskmelon	Eukaryota
Contig2877	Cucumis melo genomic chromosome, chr_9	79.868	466	7.03e-127	3656	Cucumis melo	muskmelon	Eukaryota
Contig2878	Cucumis melo genomic chromosome, chr_8	94.293	616	6.59e-172	3656	Cucumis melo	muskmelon	Eukaryota
Contig2879	Cucumis melo genomic chromosome, chr_6	96.707	555	1.46e-153	3656	Cucumis melo	muskmelon	Eukaryota
Contig2880	Cucumis melo genomic chromosome, chr_7	83.788	575	1.12e-159	3656	Cucumis melo	muskmelon	Eukaryota
[truncated: 10,949 more rows]
