# Supplementary material for: First report of begomoviruses infecting Cucumis sativus L. in North America and identification of a proposed new begomovirus species
Source: PeerJ. 2020 Jul 10;8:e9245. doi: 10.7717/peerj.9245 (PMC7357562; doi:10.7717/peerj.9245)
Supplement: Supplemental Information 11 [file peerj-08-9245-s011.xlsx]

## Sheet: Matrix_identity_CuChLV_mat
DQ318937_Euphorbia mosaic virus-[Mexico Yucatan 2004]	100.001
AF068642_Euphorbia mosaic virus-[Puerto Rico Jurabo 1991]	95.101	100.001
KJ647290_Euphorbia mosaic virus strain PF 313 1993	92.901	96.601	100.001
JQ963887_Euphorbia mosaic virus isolate Eu4	92.801	96.701	98.901	100.001
DQ395342_Euphorbia mosaic virus-[Jamaica Wissadula]	92.601	96.501	98.401	98.401	100.001
FJ807782_Euphorbia mosaic virus clone EF2E	92.501	96.501	98.301	98.301	98.701	100.001
FJ407052_Euphorbia mosaic virus-[Jamaica Wissadula Euphorbia 2004]	92.401	96.401	98.401	98.401	98.901	98.401	100.001
HQ896201_Euphorbia mosaic virus [CU-Havana 27-2007]	92.701	96.901	98.601	98.801	98.201	98.301	98.301	100.001
KU165788_Euphorbia mosaic virus isolate Holguin 943	92.601	96.101	98.001	98.101	97.701	97.701	97.701	98.101	100.001
DQ520942_Euphorbia mosaic virus-B [Mexico Jalasco Pepper 2005]	93.401	94.501	96.201	96.301	96.001	96.101	95.901	96.301	95.901	100.001
JN368145_Euphorbia mosaic Venezuela virus isolate Aragua Eu1	87.001	87.001	87.801	87.701	87.901	87.701	87.601	87.801	88.101	87.401	100.001
AY927277_Tomato mild yellow leaf curl Aragua virus-[Venezuela 10 2003]	86.701	86.801	87.501	87.401	87.501	87.301	87.601	87.501	87.701	87.201	99.201	100.001
KY353797_Tomato mild yellow leaf curl Aragua virus isolate Zulia219a	86.601	86.401	87.001	86.601	87.201	86.801	86.901	86.901	87.101	87.201	93.201	92.901	100.001
NC 039082_Euphorbia mosaic virus-Peru	83.901	83.501	83.001	82.901	83.101	82.701	82.801	83.001	83.101	82.701	84.201	84.601	84.101	100.001
KY559576_Euphorbia yellow mosaic virus isolate BRMda124514	83.601	82.901	82.601	82.401	82.401	81.901	82.001	82.501	82.501	82.301	84.701	84.801	84.301	89.401	100.001
KY559570_Euphorbia yellow mosaic virus isolate BRMda123314	83.601	82.901	82.601	82.401	82.401	81.901	82.001	82.501	82.501	82.301	84.701	84.801	84.301	89.501	99.801	100.001
KY559530_Euphorbia yellow mosaic virus isolate BRCha925111	83.501	82.701	82.301	82.001	82.001	81.501	81.701	82.101	82.101	81.901	84.201	84.201	83.401	89.201	98.601	98.601	100.001
KY559529_Euphorbia yellow mosaic virus isolate BRCha92511	83.401	82.701	82.201	82.001	82.001	81.501	81.601	82.101	82.001	81.801	84.101	84.101	83.401	89.101	98.601	98.501	100.001	100.001
KY559523_Euphorbia yellow mosaic virus isolate BRNon58510	83.401	82.701	82.401	82.101	82.101	81.601	81.801	82.201	82.201	81.901	84.201	84.201	83.401	89.201	98.601	98.501	100.001	99.901	100.001
KY559527_Euphorbia yellow mosaic virus isolate BRCha9203a11	83.401	82.701	82.201	82.001	82.001	81.501	81.601	82.001	82.001	81.801	84.101	84.101	83.401	89.201	98.501	98.501	99.901	99.801	99.801	100.001
KY559525_Euphorbia yellow mosaic virus isolate BRCha92011	83.401	82.701	82.201	82.001	82.001	81.501	81.601	82.001	82.001	81.801	84.101	84.101	83.401	89.201	98.501	98.501	99.901	99.801	99.801	100.001	100.001
KY559526_Euphorbia yellow mosaic virus isolate BRCha920111	83.401	82.701	82.201	82.001	82.001	81.501	81.601	82.001	82.001	81.801	84.101	84.101	83.401	89.301	98.501	98.501	99.901	99.801	99.801	100.001	100.001	100.001
KY559517_Euphorbia yellow mosaic virus isolate BRAts50410	83.501	82.701	82.301	82.001	82.001	81.501	81.701	82.101	82.101	81.901	84.201	84.201	83.401	89.201	98.501	98.501	99.901	99.901	99.901	99.801	99.801	99.801	100.001
KY559502_Euphorbia yellow mosaic virus isolate BRAts309	83.401	82.601	82.401	82.201	82.301	81.801	81.901	82.201	82.401	82.101	84.001	84.101	83.801	89.101	98.501	98.401	98.701	98.701	98.701	98.701	98.701	98.701	98.701	100.001
KY559537_Euphorbia yellow mosaic virus isolate BRSlg95811	83.701	83.001	82.601	82.301	82.401	82.001	82.101	82.501	82.601	82.801	84.901	84.801	84.001	89.601	98.001	97.901	98.101	98.101	98.101	98.001	98.001	98.001	98.001	97.901	100.001
KY559558_Euphorbia yellow mosaic virus isolate BRCha118914	83.601	82.601	82.501	82.301	82.401	81.901	81.901	82.401	82.501	82.601	84.601	84.601	84.101	89.401	97.901	97.801	98.101	98.001	98.001	98.001	98.001	98.001	98.001	97.901	99.201	100.001
KY559539_Euphorbia yellow mosaic virus isolate BRIju98411	83.301	82.401	82.001	81.801	81.801	81.401	81.601	81.801	81.801	81.901	84.401	84.501	84.001	89.401	97.801	97.801	97.801	97.801	97.801	97.701	97.701	97.701	97.701	97.801	98.801	99.001	100.001
KY559538_Euphorbia yellow mosaic virus isolate BRSab96611	83.801	83.001	82.501	82.401	82.301	81.901	81.901	82.501	82.501	82.501	84.801	84.701	83.901	89.401	97.901	97.901	97.901	97.901	97.901	97.901	97.901	97.901	97.901	98.101	98.001	97.901	97.901	100.001
KY559569_Euphorbia yellow mosaic virus isolate BRMda12313e14	83.801	83.001	82.801	82.501	82.601	82.301	82.401	82.701	82.501	82.401	84.601	84.401	84.101	89.601	97.301	97.301	97.301	97.201	97.201	97.201	97.201	97.201	97.301	97.101	97.401	97.301	97.201	97.501	100.001
KY559568_Euphorbia yellow mosaic virus isolate BRMda123114	83.801	83.001	82.801	82.501	82.601	82.301	82.401	82.701	82.501	82.401	84.601	84.401	84.101	89.601	97.301	97.301	97.301	97.201	97.201	97.201	97.201	97.201	97.301	97.101	97.401	97.301	97.201	97.501	100.001	100.001
KY559489_Euphorbia yellow mosaic virus isolate BRCas107311	83.701	82.701	82.701	82.501	82.401	82.001	82.201	82.601	82.501	82.301	84.501	84.401	84.001	89.401	97.101	97.101	97.101	97.001	97.001	97.001	97.001	97.001	97.101	97.101	97.201	97.201	97.101	97.401	98.801	98.801	100.001
KY559479_Euphorbia yellow mosaic virus isolate BRGui72910	83.901	82.901	82.901	82.501	82.501	82.201	82.301	82.701	82.601	82.501	84.701	84.501	84.001	89.801	97.301	97.201	97.301	97.201	97.201	97.201	97.201	97.201	97.301	97.101	97.401	97.301	97.201	97.501	98.901	98.901	99.001	100.001
KY559481_Euphorbia yellow mosaic virus isolate BRPea73810	83.601	82.701	82.601	82.301	82.301	81.901	82.201	82.501	82.401	82.301	84.501	84.301	84.001	89.901	97.301	97.301	97.301	97.201	97.201	97.201	97.201	97.201	97.301	97.201	97.401	97.201	97.001	97.601	98.701	98.701	98.901	98.901	100.001
KY559475_Euphorbia yellow mosaic virus isolate BRGua18309	83.701	82.801	82.801	82.501	82.501	82.201	82.301	82.601	82.501	82.401	84.501	84.401	83.901	89.301	97.101	97.001	97.101	97.101	97.101	97.001	97.001	97.001	97.101	97.001	97.201	97.001	96.701	97.101	98.301	98.301	98.401	98.401	98.701	100.001
KY559478_Euphorbia yellow mosaic virus isolate BRNom68210	83.601	83.001	82.601	82.201	82.501	82.101	82.101	82.501	82.501	82.501	84.501	84.301	83.901	89.501	97.201	97.201	97.101	97.001	97.001	97.001	97.001	97.001	97.101	97.001	97.201	97.301	97.101	97.401	98.601	98.601	98.701	98.801	98.701	98.201	100.001
KY559566_Euphorbia yellow mosaic virus isolate BRMda122814	83.701	82.401	82.201	82.001	82.001	81.601	81.801	82.101	82.001	82.201	84.501	84.301	83.801	89.701	96.901	96.901	96.901	96.801	96.801	96.801	96.801	96.801	96.901	96.801	97.001	97.001	97.001	97.501	98.401	98.401	98.301	98.401	98.201	97.701	98.201	100.001
KY559536_Euphorbia yellow mosaic virus isolate BRBos95711	84.101	83.001	82.401	82.301	82.301	81.901	81.901	82.301	82.101	82.401	84.901	84.801	84.301	90.001	97.601	97.501	97.401	97.301	97.301	97.301	97.301	97.301	97.401	97.401	97.501	97.501	97.801	97.901	98.201	98.201	98.101	98.401	98.101	97.801	98.101	98.301	100.001
KY559485_Euphorbia yellow mosaic virus isolate BRCov103011	83.701	82.901	82.601	82.501	82.401	82.001	82.101	82.501	82.301	82.401	84.601	84.401	83.801	89.601	97.501	97.501	97.401	97.301	97.301	97.301	97.301	97.301	97.401	97.201	97.501	97.401	97.501	98.001	98.201	98.201	98.201	98.401	98.301	97.901	98.201	98.401	99.101	100.001
KY559518_Euphorbia yellow mosaic virus isolate BRCha51010	83.901	83.101	82.601	82.401	82.401	82.001	82.101	82.601	82.601	82.301	84.801	84.601	84.001	89.501	97.501	97.401	97.201	97.201	97.201	97.101	97.101	97.101	97.201	97.201	97.401	97.401	97.501	97.801	97.901	97.901	97.701	98.001	97.801	97.701	97.701	98.001	98.901	98.901	100.001
KY559512_Euphorbia yellow mosaic virus isolate BRPon11909	84.001	83.301	82.901	82.701	82.701	82.301	82.401	82.801	82.801	82.601	85.001	84.901	84.301	89.601	97.701	97.701	97.601	97.601	97.601	97.501	97.501	97.501	97.601	97.501	97.701	97.701	97.701	98.001	98.001	98.001	97.901	98.201	98.101	97.901	97.901	98.101	99.101	98.901	99.001	100.001
KY559473_Euphorbia yellow mosaic virus isolate BRFrb15609	83.901	83.001	82.501	82.301	82.401	82.001	82.001	82.501	82.501	82.401	84.801	84.601	83.901	89.801	97.501	97.401	97.201	97.201	97.201	97.201	97.201	97.201	97.201	97.201	97.501	97.501	97.601	98.001	98.101	98.101	98.001	98.301	98.101	97.901	97.901	98.401	99.001	99.001	99.001	99.101	100.001
KY559466_Euphorbia yellow mosaic virus isolate BRVic3014	83.301	82.501	82.701	82.601	82.401	81.901	82.201	82.501	82.601	82.301	84.501	84.501	83.901	89.401	97.001	97.001	97.001	96.901	97.001	96.901	96.901	96.901	97.001	97.001	97.001	96.801	96.801	97.001	97.001	97.001	97.101	97.201	97.301	97.001	97.101	96.601	97.201	97.001	97.001	97.301	97.201	100.001
KY559464_Euphorbia yellow mosaic virus isolate BRVic2214	83.201	82.401	82.601	82.601	82.301	81.901	82.101	82.401	82.501	82.201	84.401	84.401	83.801	89.401	96.901	96.901	96.901	96.901	96.901	96.801	96.801	96.801	96.901	96.901	97.001	96.701	96.701	96.901	97.001	97.001	97.001	97.101	97.201	96.901	97.001	96.501	97.101	97.001	96.901	97.201	97.101	99.801	100.001
KY559463_Euphorbia yellow mosaic virus isolate BRVic2014	83.301	82.501	82.701	82.601	82.401	81.901	82.201	82.501	82.601	82.301	84.501	84.501	83.901	89.401	97.001	97.001	97.001	96.901	97.001	96.901	96.901	96.901	97.001	97.001	97.001	96.801	96.801	97.001	97.001	97.001	97.101	97.201	97.301	97.001	97.101	96.601	97.201	97.001	97.001	97.301	97.201	99.901	99.801	100.001
KY559468_Euphorbia yellow mosaic virus isolate BRVic3614	83.401	82.401	82.601	82.501	82.301	81.901	82.201	82.401	82.401	82.401	84.501	84.601	84.001	89.501	97.001	97.001	97.001	96.901	97.001	96.901	96.901	96.901	97.001	97.001	97.001	96.801	96.901	97.001	97.001	97.001	97.101	97.201	97.301	97.001	97.101	96.701	97.201	97.001	97.001	97.301	97.201	99.901	99.801	99.901	100.001
KY559465_Euphorbia yellow mosaic virus isolate BRVic2414	83.501	82.501	82.601	82.501	82.301	81.901	82.201	82.401	82.401	82.401	84.701	84.601	84.001	89.601	97.001	97.001	97.001	97.001	97.001	96.901	96.901	96.901	97.001	97.101	97.001	96.801	96.901	97.001	97.101	97.101	97.101	97.201	97.401	97.001	97.201	96.701	97.201	97.101	97.001	97.301	97.201	99.901	99.801	99.901	100.001	100.001
KY559471_Euphorbia yellow mosaic virus isolate BRVic7A14	83.401	82.401	82.601	82.501	82.301	81.901	82.201	82.401	82.401	82.401	84.401	84.501	83.901	89.401	97.001	96.901	96.901	96.801	96.901	96.801	96.801	96.801	96.901	96.901	96.901	96.701	96.701	96.901	96.901	96.901	97.001	97.101	97.201	96.901	97.101	96.601	97.101	96.901	96.901	97.201	97.101	99.801	99.701	99.801	99.901	99.901	100.001
KY559461_Euphorbia yellow mosaic virus isolate BRVic1314	83.301	82.401	82.701	82.601	82.301	81.901	82.201	82.401	82.501	82.301	84.401	84.501	83.901	89.401	97.001	96.901	96.901	96.901	96.901	96.901	96.901	96.901	96.901	96.901	97.001	96.701	96.701	97.001	97.001	97.001	97.001	97.201	97.301	97.001	97.101	96.601	97.101	97.001	96.901	97.201	97.201	99.901	99.801	99.901	99.901	99.901	99.801	100.001
KY559459_Euphorbia yellow mosaic virus isolate BRVic814	83.301	82.401	82.601	82.601	82.301	81.901	82.101	82.401	82.501	82.201	84.401	84.401	83.901	89.401	96.901	96.901	96.901	96.901	96.901	96.801	96.801	96.801	96.901	96.901	97.001	96.701	96.701	96.901	97.001	97.001	97.001	97.101	97.201	96.901	97.001	96.501	97.101	97.001	96.901	97.201	97.101	99.801	99.801	99.801	99.801	99.801	99.701	100.001	100.001
KY559467_Euphorbia yellow mosaic virus isolate BRVic3214	83.301	82.401	82.701	82.601	82.301	81.901	82.201	82.401	82.501	82.301	84.401	84.501	83.901	89.401	97.001	96.901	96.901	96.901	96.901	96.901	96.901	96.901	96.901	96.901	97.001	96.801	96.701	97.001	97.001	97.001	97.001	97.201	97.301	97.001	97.101	96.601	97.101	97.001	96.901	97.201	97.201	99.901	99.801	99.901	99.901	99.901	99.801	99.801	99.801
KY559472_Euphorbia yellow mosaic virus isolate BRVic7B14	83.401	82.601	82.901	82.901	82.601	82.201	82.401	82.701	82.801	82.601	84.401	84.501	83.801	89.401	96.901	96.801	96.801	96.801	96.801	96.701	96.701	96.701	96.801	96.801	96.901	96.701	96.701	96.901	97.001	97.001	97.001	97.001	97.201	97.001	97.001	96.501	97.001	97.001	96.801	97.101	97.001	99.301	99.201	99.301	99.301	99.301	99.201	99.301	99.201
KY559455_Euphorbia yellow mosaic virus isolate BRVic114	83.401	82.601	82.901	82.801	82.601	82.101	82.401	82.701	82.701	82.501	84.401	84.501	83.801	89.401	96.901	96.901	96.901	96.801	96.901	96.801	96.801	96.801	96.901	96.901	97.001	96.701	96.701	96.901	97.001	97.001	97.001	97.101	97.301	97.001	97.101	96.601	97.001	97.001	96.801	97.101	97.001	99.301	99.301	99.301	99.301	99.401	99.201	99.301	99.301
KY559469_Euphorbia yellow mosaic virus isolate BRVic6A14	83.501	82.701	82.901	82.801	82.601	82.101	82.401	82.701	82.701	82.501	84.601	84.501	83.801	89.401	96.901	96.901	96.901	96.801	96.901	96.801	96.801	96.801	96.901	96.901	97.001	96.701	96.701	96.901	97.001	97.001	97.001	97.101	97.301	97.001	97.101	96.601	97.001	97.001	96.801	97.101	97.001	99.301	99.301	99.301	99.301	99.301	99.201	99.301	99.301
KY559456_Euphorbia yellow mosaic virus isolate BRVic314	83.401	82.601	82.901	82.801	82.601	82.101	82.401	82.701	82.701	82.501	84.501	84.601	84.001	89.401	96.801	96.801	96.801	96.701	96.801	96.701	96.701	96.701	96.801	96.801	96.901	96.701	96.701	96.801	96.901	96.901	97.001	97.001	97.201	97.001	97.001	96.501	96.901	96.901	96.701	97.001	97.001	99.301	99.201	99.301	99.301	99.301	99.201	99.201	99.201
FJ619507_Euphorbia yellow mosaic virus	83.701	82.701	82.201	82.101	81.901	81.501	81.801	82.001	82.101	82.101	84.201	84.201	83.501	89.501	97.201	97.101	97.201	97.101	97.101	97.101	97.101	97.101	97.201	97.001	97.401	97.201	97.201	97.101	97.101	97.101	97.201	97.101	97.301	96.901	97.201	96.801	97.001	97.101	96.801	97.101	97.101	97.401	97.401	97.401	97.401	97.501	97.301	97.401	97.401
KY559488_Euphorbia yellow mosaic virus isolate BRAmp106811	83.701	83.101	82.501	82.401	82.201	81.701	81.801	82.301	82.301	82.101	84.601	84.501	83.801	89.801	96.901	96.801	96.901	96.901	96.901	96.901	96.901	96.801	96.901	96.701	97.001	96.801	96.801	97.001	96.901	96.901	96.901	96.901	97.101	96.801	97.001	96.601	97.001	97.101	96.801	97.101	96.901	97.401	97.401	97.401	97.401	97.401	97.301	97.401	97.401
KY559450_Euphorbia yellow mosaic virus isolate BRLac70510	83.401	82.901	82.601	82.601	82.401	82.001	82.001	82.501	82.301	82.301	84.601	84.701	83.901	89.701	97.601	97.501	97.401	97.401	97.401	97.401	97.401	97.401	97.401	97.401	97.601	97.401	97.401	97.701	97.101	97.101	97.101	97.201	97.301	97.001	97.201	96.701	97.301	97.401	97.001	97.301	97.201	97.501	97.401	97.501	97.501	97.501	97.401	97.401	97.401
KY559453_Euphorbia yellow mosaic virus isolate BRTac719110	83.601	82.901	82.701	82.601	82.401	82.001	82.001	82.501	82.401	82.501	84.601	84.401	84.001	89.601	97.301	97.201	97.301	97.201	97.201	97.201	97.201	97.201	97.201	97.001	97.201	97.101	97.201	97.201	97.101	97.101	96.901	97.101	97.101	96.901	97.201	96.801	97.101	97.201	96.801	97.001	97.001	97.201	97.101	97.201	97.201	97.201	97.101	97.201	97.101
KC706530_Euphorbia yellow mosaic virus isolate BR Flo166 08	83.601	82.801	83.001	82.801	82.601	82.101	82.501	82.801	82.901	82.601	84.901	84.701	84.101	89.401	96.901	96.901	97.001	97.001	97.001	96.901	96.901	97.001	97.001	96.801	97.201	97.001	97.001	96.701	97.201	97.201	97.101	97.201	97.501	97.401	97.401	96.601	97.101	97.201	97.101	97.501	97.101	97.301	97.201	97.301	97.301	97.301	97.201	97.201	97.201
AF224760_Cucurbit leaf curl virus	82.501	82.001	81.801	81.801	81.701	81.301	81.801	81.701	81.701	81.801	82.401	82.301	82.301	80.301	80.301	80.301	80.301	80.201	80.301	80.201	80.201	80.201	80.301	80.401	80.401	80.201	80.101	80.201	80.501	80.501	80.301	80.301	80.401	80.401	80.401	80.501	80.301	80.201	80.301	80.601	80.201	80.401	80.301	80.401	80.401	80.501	80.401	80.401	80.401
AF256200.4 Cucurbit leaf crumple virus-[Arizona]	82.601	82.101	81.801	81.801	81.801	81.301	81.801	81.701	81.701	82.001	82.401	82.301	82.401	80.301	80.301	80.301	80.201	80.201	80.201	80.101	80.101	80.201	80.201	80.401	80.301	80.301	80.101	80.201	80.501	80.501	80.301	80.401	80.401	80.401	80.501	80.501	80.401	80.201	80.401	80.601	80.301	80.401	80.301	80.401	80.401	80.501	80.401	80.401	80.401
AF421552_Squash mild leaf curl virus[Imperial Valley]	84.001	83.701	83.301	83.101	83.401	82.801	82.901	83.201	83.101	83.401	82.901	82.601	82.901	81.701	80.601	80.601	80.701	80.601	80.601	80.601	80.601	80.601	80.701	80.701	80.901	80.601	81.001	80.701	81.101	81.101	81.101	80.801	80.801	80.701	81.101	80.601	81.201	81.001	81.101	81.201	81.001	80.701	80.601	80.701	80.701	80.801	80.601	80.701	80.701
DQ285014_Squash mild leaf curl virus isolate 4	83.901	83.601	83.201	83.001	83.301	82.701	82.901	83.101	83.101	83.401	82.901	82.601	82.901	81.701	80.501	80.501	80.601	80.601	80.601	80.601	80.601	80.601	80.601	80.601	80.901	80.601	81.001	80.701	81.101	81.101	81.001	80.801	80.701	80.801	81.001	80.601	81.101	81.001	81.001	81.201	81.001	80.701	80.601	80.701	80.701	80.701	80.601	80.701	80.601
AF256203_Squash leaf curl virus strain SLCVWAZ	83.201	82.701	82.201	82.201	82.201	81.701	82.101	82.401	82.801	82.701	82.401	82.501	82.901	81.301	80.501	80.501	80.301	80.201	80.201	80.301	80.301	80.401	80.301	80.301	80.501	80.501	80.501	80.501	80.401	80.401	80.401	80.601	80.401	80.401	80.701	80.201	80.501	80.601	80.601	80.601	80.701	80.101	80.101	80.101	79.901	80.001	79.901	80.101	80.001
DQ285016_Squash leaf curl virus isolate 10	84.201	83.401	82.901	82.901	82.801	82.401	82.701	83.101	83.401	83.501	82.801	83.001	83.301	81.601	81.001	81.001	80.601	80.601	80.601	80.701	80.701	80.801	80.601	80.901	80.901	80.901	80.901	81.001	80.901	80.901	80.901	81.001	80.801	80.701	81.101	80.801	81.101	81.001	81.001	81.001	81.101	80.501	80.501	80.501	80.501	80.501	80.501	80.501	80.501
KT099117_Squash leaf curl virus isolate CASqC2	83.501	82.701	82.301	82.301	82.301	81.901	82.201	82.601	82.801	83.101	82.301	82.401	82.901	81.001	80.601	80.501	80.101	80.101	80.101	80.201	80.201	80.301	80.201	80.301	80.401	80.301	80.301	80.501	80.401	80.401	80.301	80.501	80.201	80.001	80.701	80.401	80.701	80.501	80.601	80.601	80.601	80.101	80.001	80.101	80.201	80.201	80.201	80.101	80.101
MF187211_Squash leaf curl virus isolate SLCuVMx BCS La Paz	84.001	83.301	82.701	82.701	82.801	82.301	82.701	83.101	83.201	83.201	82.701	82.801	83.401	81.601	81.101	81.101	80.601	80.601	80.601	80.601	80.601	80.701	80.601	80.701	81.001	80.801	80.901	81.301	81.001	81.001	80.901	81.001	80.801	80.701	81.101	80.801	81.201	81.101	81.101	81.101	81.201	80.701	80.701	80.701	80.801	80.801	80.801	80.801	80.701
KM595223_Squash leaf curl virus isolate PA1J253	83.701	83.101	82.601	82.601	82.601	82.201	82.501	82.901	83.101	83.201	82.601	82.601	83.201	81.301	80.901	80.801	80.401	80.401	80.401	80.401	80.401	80.501	80.401	80.501	80.901	80.701	80.801	80.901	80.701	80.701	80.701	80.801	80.501	80.501	81.001	80.601	80.901	80.901	80.901	80.901	81.101	80.501	80.501	80.501	80.501	80.501	80.501	80.501	80.501
HQ184436_Squash leaf curl virus isolate IL	83.701	83.101	82.601	82.601	82.601	82.201	82.501	82.901	83.101	83.201	82.601	82.601	83.301	81.301	80.901	80.901	80.401	80.401	80.401	80.401	80.401	80.501	80.401	80.501	80.901	80.701	80.801	80.901	80.701	80.701	80.701	80.801	80.501	80.501	81.001	80.601	80.901	80.901	80.901	80.901	81.101	80.501	80.501	80.501	80.501	80.501	80.501	80.501	80.501
KM595238_Squash leaf curl virus isolate PA3T6	83.401	82.801	82.301	82.301	82.301	81.901	82.301	82.601	82.801	82.801	82.101	82.201	83.101	80.901	80.601	80.501	80.101	80.101	80.101	80.101	80.101	80.201	80.101	80.201	80.601	80.401	80.501	80.601	80.401	80.401	80.401	80.501	80.201	80.201	80.601	80.301	80.601	80.601	80.601	80.601	80.701	80.201	80.201	80.201	80.201	80.201	80.201	80.201	80.201
DQ285019_Squash leaf curl virus isolate Cairo	83.501	83.201	82.701	82.701	82.701	82.301	82.701	83.001	83.301	83.201	82.601	82.601	83.601	81.501	81.001	80.901	80.401	80.401	80.401	80.401	80.401	80.501	80.401	80.701	80.901	80.901	80.801	80.901	80.901	80.901	80.901	80.901	80.701	80.601	81.101	80.801	81.001	80.901	80.801	80.801	81.001	80.501	80.501	80.501	80.501	80.601	80.501	80.601	80.501
KM595154_Squash leaf curl virus isolate EG115	83.301	82.901	82.401	82.501	82.401	82.001	82.401	82.701	83.001	82.901	82.401	82.301	83.401	81.201	80.701	80.701	80.201	80.101	80.101	80.101	80.101	80.201	80.201	80.401	80.701	80.601	80.501	80.601	80.601	80.601	80.701	80.701	80.401	80.401	80.801	80.501	80.701	80.701	80.501	80.501	80.701	80.301	80.201	80.301	80.301	80.301	80.301	80.301	80.301
KM595140_Squash leaf curl virus isolate EG21	83.101	82.701	82.201	82.301	82.301	81.801	82.201	82.501	82.601	82.801	82.101	82.101	83.001	81.201	80.301	80.301	80.001	80.001	80.001	79.901	79.901	80.001	80.001	80.201	80.601	80.501	80.401	80.301	80.301	80.301	80.301	80.301	80.301	80.301	80.501	80.101	80.401	80.301	80.301	80.301	80.401	79.901	79.801	79.901	79.901	79.901	79.901	79.901	79.901
HM368373_Squash leaf curl virus isolate LB2	83.601	83.201	82.801	82.801	82.801	82.301	82.701	83.101	83.401	83.201	82.601	82.601	83.601	81.501	81.001	80.901	80.401	80.401	80.401	80.401	80.401	80.501	80.401	80.701	81.101	80.901	80.801	81.101	80.901	80.901	80.901	80.901	80.701	80.601	81.101	80.801	81.101	81.101	81.001	80.901	81.201	80.701	80.601	80.701	80.701	80.701	80.701	80.701	80.701
KM595210_Squash leaf curl virus isolate JO3228	83.601	83.101	82.501	82.601	82.601	82.101	82.501	82.901	83.101	83.101	82.601	82.601	83.701	81.601	81.001	81.001	80.501	80.501	80.501	80.401	80.401	80.501	80.501	80.701	81.101	81.001	80.801	81.101	80.901	80.901	80.901	81.001	80.801	80.701	81.201	80.801	81.201	81.101	81.101	81.001	81.201	80.701	80.701	80.701	80.701	80.801	80.701	80.801	80.701
KM595156_Squash leaf curl virus isolate JO1112	83.601	83.101	82.601	82.701	82.601	82.301	82.701	83.001	83.201	83.101	82.501	82.501	83.201	81.301	81.001	80.901	80.401	80.401	80.401	80.401	80.401	80.501	80.401	80.701	81.001	80.801	80.801	81.001	80.901	80.901	80.901	81.001	80.601	80.601	81.101	80.801	81.101	81.101	81.101	80.901	81.101	80.601	80.501	80.601	80.601	80.701	80.601	80.701	80.601
KT099131_Squash leaf curl virus isolate IsSq3	83.501	83.101	82.601	82.701	82.601	82.201	82.601	83.001	83.201	83.101	82.501	82.501	83.401	81.301	80.901	80.901	80.401	80.301	80.301	80.301	80.301	80.401	80.401	80.601	80.901	80.701	80.701	81.001	80.801	80.801	80.801	80.801	80.501	80.501	81.001	80.701	81.101	81.001	81.001	80.901	81.001	80.601	80.501	80.601	80.601	80.701	80.601	80.701	80.601
KM595197_Squash leaf curl virus isolate JO338	83.601	83.101	82.701	82.701	82.701	82.201	82.601	83.001	83.201	83.201	82.601	82.601	83.601	81.401	81.101	81.101	80.601	80.601	80.601	80.501	80.501	80.601	80.601	80.801	81.101	80.901	80.901	81.201	81.001	81.001	81.001	81.101	80.801	80.801	81.301	80.901	81.301	81.201	81.201	81.101	81.301	80.801	80.701	80.801	80.801	80.901	80.801	80.901	80.801
KM595191_Squash leaf curl virus isolate JO2214	83.601	83.201	82.701	82.701	82.701	82.301	82.701	83.001	83.301	83.201	82.701	82.701	83.601	81.501	81.101	81.101	80.601	80.501	80.501	80.501	80.501	80.601	80.601	80.801	81.101	80.901	80.901	81.201	81.001	81.001	81.001	81.101	80.701	80.701	81.201	80.901	81.201	81.201	81.201	81.101	81.201	80.801	80.701	80.801	80.801	80.801	80.801	80.801	80.801
KM595193_Squash leaf curl virus isolate JO2218	83.301	82.901	82.401	82.501	82.401	82.001	82.401	82.701	83.001	82.901	82.501	82.501	83.401	81.301	80.701	80.601	80.401	80.401	80.401	80.401	80.401	80.501	80.401	80.601	81.001	80.801	80.801	80.801	80.701	80.701	80.701	80.701	80.601	80.601	80.901	80.501	80.901	80.801	80.801	80.901	80.901	80.401	80.401	80.401	80.401	80.501	80.401	80.501	80.401
KM595132_Squash leaf curl virus isolate LB2432	83.301	82.901	82.501	82.501	82.501	82.101	82.401	82.801	83.201	82.901	82.601	82.501	83.401	81.201	80.701	80.601	80.301	80.201	80.201	80.201	80.201	80.301	80.301	80.501	80.901	80.701	80.601	80.701	80.601	80.601	80.601	80.701	80.501	80.501	80.801	80.501	80.801	80.801	80.801	80.801	80.801	80.401	80.301	80.401	80.401	80.401	80.401	80.401	80.401
KM595134_Squash leaf curl virus isolate LB3536	83.301	82.901	82.401	82.501	82.501	82.001	82.401	82.701	83.001	82.901	82.501	82.401	83.301	81.301	80.901	80.901	80.401	80.401	80.401	80.301	80.301	80.401	80.401	80.601	80.901	80.701	80.701	81.001	80.901	80.901	80.901	81.001	80.701	80.701	81.201	80.701	81.101	81.001	81.001	80.901	81.101	80.601	80.501	80.601	80.601	80.701	80.601	80.701	80.601
KM595139_Squash leaf curl virus isolate LB229	83.501	83.301	82.801	82.801	82.801	82.401	82.801	83.101	83.401	83.301	82.601	82.501	83.501	81.301	81.101	81.101	80.601	80.601	80.601	80.501	80.501	80.601	80.601	80.801	81.101	80.901	80.901	81.001	80.901	80.901	81.001	81.101	80.801	80.801	81.301	80.701	81.101	81.001	81.101	80.901	81.101	80.801	80.701	80.801	80.801	80.801	80.801	80.801	80.801
KM595124_Squash leaf curl virus isolate IL3101	83.501	83.101	82.601	82.701	82.601	82.201	82.601	83.001	83.201	83.201	82.501	82.501	83.601	81.401	81.101	81.001	80.501	80.501	80.501	80.401	80.401	80.501	80.501	80.701	81.001	80.801	80.801	81.101	81.001	81.001	81.001	81.001	80.701	80.701	81.201	80.801	81.201	81.101	81.101	81.001	81.201	80.701	80.601	80.701	80.701	80.701	80.701	80.701	80.701
KM595125_Squash leaf curl virus isolate IL3102	83.501	83.001	82.501	82.601	82.501	82.101	82.501	82.901	83.101	83.101	82.501	82.501	83.501	81.501	81.001	81.001	80.501	80.401	80.401	80.401	80.401	80.501	80.501	80.701	81.001	80.801	80.801	81.001	81.001	81.001	81.001	81.001	80.701	80.701	81.201	80.801	81.101	81.101	81.101	80.901	81.101	80.701	80.601	80.701	80.701	80.701	80.701	80.701	80.701
KM595208_Squash leaf curl virus isolate JO3225	83.601	83.301	82.701	82.801	82.801	82.301	82.701	83.101	83.401	83.201	82.701	82.701	83.501	81.401	81.101	81.101	80.601	80.501	80.501	80.501	80.501	80.601	80.601	80.801	81.001	80.801	80.801	81.201	81.001	81.001	81.001	81.101	80.701	80.701	81.201	80.901	81.201	81.201	81.201	81.101	81.201	80.801	80.701	80.801	80.801	80.801	80.801	80.801	80.801
KM595094_Squash leaf curl virus isolate IL16	83.601	83.101	82.701	82.701	82.701	82.201	82.601	83.001	83.201	83.201	82.601	82.601	83.501	81.501	81.101	81.001	80.501	80.501	80.501	80.401	80.401	80.501	80.501	80.701	81.001	80.801	80.801	81.101	81.001	81.001	81.001	81.001	80.701	80.701	81.201	80.901	81.201	81.101	81.101	81.001	81.201	80.701	80.701	80.701	80.701	80.801	80.701	80.801	80.701
MK284929_Squash leaf curl virus isolate Fayoum	83.401	83.101	82.601	82.601	82.601	82.101	82.401	82.901	83.201	83.201	82.501	82.501	83.401	81.301	80.901	80.901	80.401	80.401	80.401	80.301	80.301	80.401	80.401	80.601	80.901	80.801	80.801	81.001	80.901	80.901	80.901	81.001	80.601	80.801	81.101	80.801	81.101	81.101	81.001	80.901	81.101	80.601	80.501	80.601	80.601	80.701	80.601	80.701	80.601
KM595202_Squash leaf curl virus isolate JO3126	83.901	83.401	82.901	82.801	82.901	82.401	82.801	83.201	83.301	83.401	82.701	82.701	83.601	81.501	81.101	81.101	80.701	80.601	80.601	80.601	80.601	80.701	80.701	80.801	81.201	81.001	81.101	81.201	81.001	81.001	81.001	81.101	80.801	80.801	81.301	80.901	81.301	81.201	81.201	81.201	81.301	80.801	80.701	80.801	80.801	80.901	80.801	80.901	80.801
KM595095_Squash leaf curl virus isolate IL18	83.301	82.801	82.401	82.501	82.401	81.901	82.301	82.701	82.901	82.901	82.301	82.301	83.101	81.201	80.801	80.701	80.301	80.201	80.201	80.201	80.201	80.301	80.301	80.501	80.801	80.601	80.601	80.901	80.701	80.701	80.701	80.801	80.401	80.401	80.901	80.601	80.901	80.901	80.901	80.801	80.901	80.501	80.401	80.501	80.501	80.501	80.501	80.501	80.501
KM595099_Squash leaf curl virus isolate IL119	83.301	82.901	82.401	82.501	82.401	82.001	82.401	82.701	83.001	82.901	82.301	82.301	83.201	81.101	80.801	80.701	80.301	80.201	80.201	80.201	80.201	80.301	80.301	80.501	80.801	80.601	80.601	80.901	80.701	80.701	81.001	80.801	80.401	80.501	80.901	80.601	80.901	80.901	80.901	80.801	80.901	80.501	80.401	80.501	80.501	80.501	80.501	80.501	80.501
KM595108_Squash leaf curl virus isolate IL250	83.501	83.001	82.601	82.701	82.601	82.101	82.501	82.901	83.101	83.101	82.501	82.501	83.401	81.301	80.901	80.901	80.401	80.301	80.301	80.301	80.301	80.401	80.401	80.601	80.901	80.701	80.701	81.001	80.801	80.801	80.801	80.901	80.501	80.501	81.001	80.701	81.101	81.001	81.001	80.901	81.001	80.601	80.501	80.601	80.601	80.601	80.601	80.601	80.601
KM595183_Squash leaf curl virus isolate JO2121	83.501	83.101	82.501	82.601	82.501	82.101	82.501	82.901	83.101	83.101	82.601	82.501	83.501	81.301	81.001	80.901	80.401	80.401	80.401	80.401	80.401	80.501	80.401	80.701	81.001	80.801	80.801	81.001	80.801	80.801	81.101	80.901	80.501	80.501	81.001	80.701	81.101	81.001	81.001	80.901	81.001	80.701	80.601	80.701	80.701	80.701	80.701	80.701	80.701
MK284931_Squash leaf curl virus isolate Bani Suef	83.601	83.101	82.701	82.701	82.701	82.201	82.601	83.001	83.301	83.201	82.701	82.701	83.901	81.201	80.801	80.801	80.501	80.401	80.401	80.401	80.401	80.501	80.501	80.701	81.001	80.901	81.001	80.801	80.801	80.801	80.801	80.801	80.601	80.601	81.001	80.701	81.001	80.901	80.901	81.001	81.101	80.501	80.501	80.501	80.601	80.601	80.601	80.601	80.501
KM595179_Squash leaf curl virus isolate JO226	83.501	83.001	82.501	82.601	82.601	82.101	82.501	82.901	83.001	83.001	82.501	82.601	83.601	81.301	80.901	80.801	80.501	80.401	80.401	80.401	80.401	80.501	80.501	80.701	81.001	80.801	80.901	80.901	80.801	80.801	80.801	80.801	80.701	80.701	81.001	80.701	81.001	81.001	81.001	81.001	81.001	80.601	80.501	80.601	80.601	80.601	80.601	80.601	80.601
KM595167_Squash leaf curl virus isolate JO1132	83.401	82.901	82.401	82.501	82.501	82.001	82.401	82.701	83.101	83.001	82.501	82.501	83.601	81.201	80.901	80.901	80.401	80.401	80.401	80.301	80.301	80.401	80.401	80.601	80.901	80.701	80.701	81.001	80.801	80.801	80.801	80.901	80.601	80.601	81.101	80.701	81.101	81.001	81.001	80.901	81.101	80.601	80.501	80.601	80.601	80.701	80.601	80.701	80.601
KP795975_Squash leaf curl virus isolate Elnoubaria01	83.101	82.701	82.201	82.201	82.201	81.801	82.201	82.501	82.901	82.701	82.601	82.501	83.401	81.301	80.901	80.901	80.401	80.401	80.401	80.301	80.301	80.401	80.401	80.601	80.901	80.701	80.701	81.001	80.801	80.801	80.801	80.901	80.601	80.501	81.201	80.701	81.101	81.001	81.001	80.901	81.101	80.601	80.501	80.601	80.601	80.601	80.501	80.601	80.601
KM595163_Squash leaf curl virus isolate JO1117	83.501	83.101	82.601	82.601	82.601	82.101	82.501	82.901	83.201	83.101	82.601	82.501	83.401	81.401	81.001	80.901	80.501	80.401	80.401	80.401	80.401	80.501	80.501	80.701	81.001	80.801	80.801	81.001	80.901	80.901	80.901	81.001	80.601	80.601	81.101	80.801	81.101	81.101	81.101	80.901	81.101	80.701	80.601	80.701	80.701	80.701	80.701	80.701	80.701
KM595174_Squash leaf curl virus isolate JO1641	83.601	83.101	82.701	82.701	82.701	82.201	82.601	83.001	83.201	83.201	82.601	82.601	83.601	81.401	81.101	81.001	80.501	80.501	80.501	80.401	80.401	80.501	80.501	80.701	81.001	80.801	80.801	81.101	81.001	81.001	81.001	81.001	80.701	80.701	81.201	80.801	81.201	81.101	81.101	81.001	81.201	80.701	80.701	80.701	80.701	80.801	80.701	80.801	80.701
KM595196_Squash leaf curl virus isolate JO336	83.501	83.201	82.701	82.701	82.701	82.301	82.701	83.001	83.301	83.201	82.701	82.601	83.601	81.401	81.001	81.001	80.501	80.401	80.401	80.401	80.401	80.501	80.501	80.701	81.001	80.801	80.801	81.101	80.901	80.901	80.901	81.001	80.701	80.701	81.201	80.801	81.201	81.101	81.101	81.001	81.201	80.701	80.601	80.701	80.701	80.701	80.701	80.701	80.701
KM595092_Squash leaf curl virus isolate IL12	83.201	82.801	82.301	82.301	82.301	81.801	82.201	82.601	82.901	82.801	82.201	82.101	83.001	81.101	80.701	80.601	80.101	80.101	80.101	80.101	80.101	80.201	80.101	80.401	80.601	80.501	80.501	80.701	80.601	80.601	80.601	80.601	80.301	80.301	80.801	80.401	80.801	80.801	80.701	80.601	80.801	80.401	80.301	80.401	80.401	80.401	80.401	80.401	80.401
KM595093_Squash leaf curl virus isolate IL13	83.301	82.901	82.401	82.401	82.401	81.901	82.301	82.701	82.901	82.901	82.301	82.301	83.101	81.301	80.901	80.901	80.401	80.301	80.301	80.301	80.301	80.401	80.401	80.601	80.901	80.701	80.701	81.001	80.801	80.801	80.801	80.901	80.501	80.501	81.001	80.701	81.101	81.001	80.901	80.901	81.001	80.601	80.501	80.601	80.601	80.601	80.601	80.601	80.601
KM595133_Squash leaf curl virus isolate LB3533	83.101	82.601	82.501	82.601	82.301	81.901	82.601	82.901	83.101	83.001	82.601	82.501	83.401	81.201	80.701	80.601	80.301	80.301	80.301	80.201	80.201	80.301	80.301	80.401	80.801	80.601	80.701	80.701	80.601	80.601	80.601	80.601	80.501	80.501	80.801	80.501	80.801	80.801	80.801	80.801	80.801	80.401	80.301	80.401	80.401	80.401	80.401	80.401	80.401
KM595199_Squash leaf curl virus isolate JO3114	83.501	83.001	82.501	82.401	82.501	82.101	82.501	82.901	83.101	83.001	82.401	82.501	83.401	81.301	80.901	80.901	80.401	80.401	80.401	80.401	80.401	80.501	80.401	80.601	81.001	80.801	80.801	81.001	80.801	80.801	80.801	80.901	80.701	80.701	81.001	80.701	81.101	81.001	81.001	81.001	81.001	80.601	80.501	80.601	80.601	80.601	80.601	80.601	80.601
KM595173_Squash leaf curl virus isolate JO1630	83.601	83.101	82.701	82.701	82.701	82.201	82.601	83.001	83.201	83.201	82.601	82.601	83.601	81.401	81.101	81.001	80.501	80.501	80.501	80.401	80.401	80.501	80.501	80.701	81.001	80.801	80.801	81.101	81.001	81.001	81.001	81.001	80.701	80.701	81.201	80.801	81.201	81.101	81.101	81.001	81.201	80.701	80.701	80.701	80.701	80.801	80.701	80.801	80.701
KM595170_Squash leaf curl virus isolate JO1140	83.601	83.201	82.701	82.701	82.701	82.301	82.701	82.901	83.301	83.201	82.601	82.501	83.501	81.401	81.101	81.101	80.601	80.501	80.501	80.501	80.501	80.601	80.601	80.801	81.101	80.901	80.901	81.201	81.001	81.001	81.001	81.101	80.701	80.701	81.201	80.901	81.201	81.201	81.201	81.101	81.201	80.801	80.701	80.801	80.801	80.801	80.801	80.801	80.801
KM595178_Squash leaf curl virus isolate JO224	83.601	83.101	82.601	82.701	82.601	82.201	82.601	82.901	83.201	83.101	82.701	82.701	83.601	81.401	81.001	81.001	80.501	80.401	80.401	80.401	80.401	80.501	80.501	80.701	80.901	80.701	80.701	81.101	80.901	80.901	80.901	81.001	80.701	80.701	81.201	80.801	81.201	81.101	81.101	81.001	81.201	80.701	80.601	80.701	80.701	80.701	80.701	80.701	80.701
KM595122_Squash leaf curl virus isolate IL399	83.501	82.901	82.401	82.401	82.501	82.001	82.401	82.701	83.001	83.101	82.301	82.301	83.301	81.101	80.701	80.701	80.201	80.201	80.201	80.101	80.101	80.201	80.201	80.401	80.801	80.601	80.601	80.901	80.601	80.601	80.601	80.701	80.301	80.301	80.801	80.501	80.901	80.801	80.801	80.601	80.901	80.401	80.301	80.401	80.401	80.401	80.401	80.401	80.401
KM595135_Squash leaf curl virus isolate LB3537	83.301	82.901	82.401	82.401	82.401	82.001	82.401	82.701	83.001	82.901	82.601	82.501	83.501	81.201	80.801	80.801	80.201	80.101	80.101	80.101	80.101	80.201	80.201	80.501	80.801	80.601	80.601	80.901	80.701	80.701	80.701	80.801	80.501	80.501	81.001	80.601	81.001	80.901	80.901	80.801	81.001	80.401	80.401	80.401	80.401	80.501	80.401	80.501	80.401
KM595158_Squash leaf curl virus isolate JO1161	83.501	83.001	82.601	82.601	82.501	82.101	82.501	82.901	83.201	83.101	82.501	82.501	83.501	81.301	80.801	80.801	80.301	80.301	80.301	80.201	80.201	80.301	80.301	80.501	80.801	80.601	80.601	80.901	80.701	80.701	80.701	80.801	80.501	80.501	81.001	80.601	81.001	80.901	80.901	80.801	81.001	80.501	80.401	80.501	80.501	80.501	80.501	80.501	80.501
KM595185_Squash leaf curl virus isolate JO2128	83.401	83.101	82.501	82.501	82.501	82.101	82.501	82.801	83.101	83.001	82.601	82.501	83.501	81.401	81.001	80.901	80.401	80.401	80.401	80.401	80.401	80.501	80.401	80.701	81.001	80.801	80.801	81.101	80.901	80.901	80.901	81.001	80.601	80.601	81.101	80.801	81.201	81.101	81.101	81.001	81.201	80.701	80.601	80.701	80.701	80.701	80.701	80.701	80.701
KM595206_Squash leaf curl virus isolate JO3215	83.501	83.101	82.601	82.601	82.601	82.101	82.501	82.901	83.201	83.101	82.701	82.701	83.601	81.401	81.101	81.001	80.501	80.501	80.501	80.401	80.401	80.501	80.501	80.701	81.001	80.801	80.801	81.101	81.001	81.001	80.901	81.001	80.601	80.601	81.101	80.801	81.201	81.101	81.101	81.001	81.201	80.701	80.601	80.701	80.701	80.701	80.701	80.701	80.701
KM595200_Squash leaf curl virus isolate JO3116	83.501	83.001	82.501	82.601	82.601	82.101	82.501	82.901	83.101	83.101	82.601	82.501	83.501	81.501	81.101	81.001	80.501	80.501	80.501	80.401	80.401	80.501	80.501	80.701	81.001	80.801	80.801	81.101	81.001	81.001	81.001	81.001	80.701	80.701	81.201	80.801	81.201	81.101	81.101	81.001	81.201	80.701	80.701	80.701	80.701	80.801	80.701	80.801	80.701
KM595187_Squash leaf curl virus isolate JO2137	83.501	82.901	82.401	82.501	82.501	82.001	82.401	82.801	83.001	82.901	82.501	82.401	83.501	81.201	81.001	80.901	80.401	80.401	80.401	80.401	80.401	80.501	80.401	80.701	81.001	80.801	80.801	81.001	80.901	80.901	80.901	81.001	80.701	80.701	81.101	80.801	81.101	81.101	81.101	80.901	81.101	80.701	80.601	80.701	80.701	80.701	80.701	80.701	80.701
KM595175_Squash leaf curl virus isolate JO218	83.501	82.901	82.501	82.501	82.601	82.001	82.401	82.801	83.101	83.001	82.501	82.401	83.501	81.401	81.101	81.001	80.501	80.501	80.501	80.401	80.401	80.501	80.501	80.701	81.001	80.801	80.801	81.101	81.001	81.001	81.001	81.001	80.701	80.701	81.301	80.801	81.201	81.101	81.101	81.001	81.201	80.701	80.701	80.701	80.701	80.801	80.701	80.801	80.701
KM595157_Squash leaf curl virus isolate JO1133	83.601	83.101	82.701	82.701	82.801	82.201	82.601	83.001	83.201	83.101	82.601	82.501	83.501	81.401	81.101	81.101	80.601	80.501	80.501	80.501	80.501	80.601	80.601	80.801	81.001	80.801	80.801	81.101	81.001	81.001	81.101	81.101	80.701	80.701	81.201	80.901	81.201	81.201	81.001	81.101	81.201	80.801	80.701	80.801	80.801	80.801	80.801	80.801	80.801
KM595218_Squash leaf curl virus isolate PA1J245	83.801	83.301	82.801	82.801	82.801	82.401	82.801	83.101	83.301	83.301	82.601	82.801	83.601	81.401	81.101	81.101	80.601	80.601	80.601	80.601	80.601	80.701	80.601	80.701	81.101	80.901	81.001	81.101	80.901	80.901	80.901	81.001	80.801	80.801	81.201	80.801	81.201	81.101	81.101	81.201	81.201	80.701	80.701	80.701	80.701	80.801	80.701	80.801	80.701
KM595219_Squash leaf curl virus isolate PA1J246	83.801	83.301	82.901	82.801	82.801	82.401	82.801	83.101	83.301	83.301	82.601	82.701	83.601	81.501	81.101	81.001	80.601	80.601	80.601	80.601	80.601	80.701	80.601	80.701	81.101	80.901	81.001	81.101	81.001	81.001	81.001	81.001	80.801	80.801	81.201	80.801	81.201	81.101	81.101	81.201	81.201	80.701	80.701	80.701	80.701	80.801	80.701	80.801	80.701
KM595221_Squash leaf curl virus isolate PA1J249	83.801	83.301	82.801	82.701	82.801	82.301	82.701	83.001	83.201	83.301	82.601	82.601	83.501	81.501	81.001	81.001	80.601	80.601	80.601	80.601	80.601	80.701	80.601	80.701	81.101	80.901	81.001	81.101	80.901	80.901	80.901	81.001	80.801	80.801	81.201	80.801	81.201	81.101	81.101	81.201	81.201	80.701	80.701	80.701	80.701	80.801	80.701	80.801	80.701
KM595217_Squash leaf curl virus isolate PA1J244	83.701	83.201	82.701	82.701	82.701	82.301	82.701	83.001	83.201	83.201	82.501	82.501	83.501	81.401	81.001	81.001	80.601	80.601	80.601	80.601	80.601	80.701	80.601	80.701	81.101	80.901	81.001	81.101	80.901	80.901	80.901	81.001	80.701	80.701	81.201	80.801	81.201	81.101	81.101	81.101	81.201	80.701	80.601	80.701	80.701	80.701	80.701	80.701	80.701
KM595216_Squash leaf curl virus isolate PA1J243	83.701	83.101	82.701	82.601	82.701	82.201	82.601	82.901	83.101	83.201	82.501	82.501	83.301	81.401	81.001	81.001	80.601	80.601	80.601	80.601	80.601	80.701	80.601	80.701	81.101	80.901	81.001	81.101	80.901	80.901	80.901	81.001	80.701	80.701	81.201	80.801	81.101	81.101	81.101	81.101	81.201	80.701	80.601	80.701	80.701	80.701	80.701	80.701	80.701
KM595227_Squash leaf curl virus isolate PA2Q335	83.901	83.401	82.901	82.801	82.901	82.401	82.801	83.101	83.301	83.401	82.701	82.701	83.601	81.601	81.101	81.101	80.701	80.601	80.601	80.601	80.601	80.701	80.701	80.801	81.101	81.001	81.101	81.201	81.001	81.001	81.001	81.101	80.801	80.801	81.201	80.901	81.201	81.201	81.201	81.201	81.201	80.801	80.701	80.801	80.801	80.801	80.801	80.801	80.801
KC441465_Squash leaf curl virus isolate PAL	83.701	83.101	82.601	82.601	82.601	82.201	82.601	82.901	83.101	83.101	82.501	82.501	83.401	81.301	80.901	80.801	80.401	80.401	80.401	80.401	80.401	80.501	80.401	80.501	80.901	80.701	80.801	80.901	80.801	80.801	80.801	80.801	80.601	80.601	81.001	80.601	81.001	81.001	80.901	81.001	81.001	80.501	80.501	80.501	80.501	80.601	80.501	80.601	80.501
KM595229_Squash leaf curl virus isolate PA2Q340	83.801	83.301	82.801	82.701	82.901	82.301	82.701	83.101	83.201	83.301	82.601	82.701	83.601	81.501	81.101	81.001	80.601	80.601	80.601	80.601	80.601	80.701	80.601	80.701	81.101	80.901	81.001	81.101	81.001	81.001	81.001	81.001	80.801	80.801	81.201	80.801	81.201	81.101	81.101	81.201	81.201	80.701	80.701	80.701	80.701	80.801	80.701	80.801	80.701
KM595228_Squash leaf curl virus isolate PA2Q336	83.801	83.201	82.701	82.701	82.801	82.301	82.701	83.001	83.201	83.201	82.601	82.701	83.501	81.401	81.001	81.001	80.601	80.501	80.501	80.501	80.501	80.601	80.601	80.701	81.001	80.801	80.901	81.001	80.901	80.901	80.901	81.001	80.701	80.701	81.201	80.801	81.201	81.101	81.101	81.101	81.201	80.801	80.701	80.801	80.801	80.901	80.801	80.901	80.801
KM595236_Squash leaf curl virus isolate PA3T4	83.801	83.301	82.801	82.701	82.901	82.401	82.801	83.101	83.201	83.301	82.601	82.601	83.401	81.401	81.101	81.001	80.601	80.601	80.601	80.601	80.601	80.701	80.601	80.701	81.101	80.901	81.001	81.101	80.901	80.901	80.901	81.001	80.701	80.701	81.201	80.801	81.201	81.101	81.101	81.101	81.201	80.701	80.601	80.701	80.701	80.701	80.701	80.701	80.701
KM595237_Squash leaf curl virus isolate PA3T5	83.601	83.101	82.701	82.701	82.701	82.301	82.701	83.001	83.101	83.201	82.501	82.501	83.501	81.401	81.001	80.901	80.601	80.501	80.501	80.501	80.501	80.601	80.601	80.701	81.001	80.801	80.901	81.001	80.901	80.901	80.901	81.001	80.701	80.701	81.101	80.801	81.101	81.101	81.101	81.101	81.101	80.701	80.601	80.701	80.701	80.701	80.701	80.701	80.701
KM595224_Squash leaf curl virus isolate PA2Q327	83.701	83.201	82.701	82.701	82.701	82.301	82.701	83.001	83.101	83.201	82.501	82.501	83.501	81.301	80.901	80.901	80.501	80.501	80.501	80.501	80.501	80.601	80.501	80.601	81.001	80.801	80.901	81.001	80.801	80.801	80.801	80.901	80.701	80.701	81.101	80.701	81.101	81.001	81.001	81.001	81.101	80.601	80.501	80.601	80.601	80.701	80.601	80.701	80.601
KM595235_Squash leaf curl virus isolate PA3T3	83.501	83.101	82.701	82.701	82.701	82.201	82.601	82.901	83.201	83.201	82.501	82.501	83.401	81.401	81.001	81.001	80.601	80.601	80.601	80.601	80.601	80.701	80.601	80.701	81.101	80.901	81.001	81.101	80.901	80.901	80.901	81.001	80.701	80.701	81.201	80.801	81.201	81.101	81.101	81.101	81.201	80.701	80.601	80.701	80.701	80.701	80.701	80.701	80.701
KM595230_Squash leaf curl virus isolate PA2Q344	83.801	83.201	82.701	82.701	82.701	82.301	82.701	83.001	83.201	83.201	82.501	82.501	83.401	81.401	81.001	80.901	80.601	80.501	80.501	80.501	80.501	80.601	80.601	80.701	81.001	80.801	80.901	81.001	80.901	80.901	80.901	81.001	80.701	80.701	81.101	80.801	81.101	81.101	81.101	81.101	81.101	80.701	80.601	80.701	80.701	80.701	80.701	80.701	80.701
KM595231_Squash leaf curl virus isolate PA2Q345	83.601	83.301	82.801	82.501	82.801	82.301	82.701	83.001	83.101	83.301	82.301	82.401	83.301	81.401	80.901	80.901	80.701	80.601	80.601	80.601	80.601	80.701	80.701	80.701	81.101	80.901	80.901	80.901	80.801	80.801	80.801	80.801	80.801	80.801	81.001	80.601	81.001	80.901	80.901	81.001	81.001	80.601	80.501	80.601	80.601	80.701	80.601	80.701	80.601
KM595098_Squash leaf curl virus isolate IL112	83.401	83.101	82.601	82.701	82.601	82.201	82.601	82.901	83.201	83.101	82.501	82.501	83.401	81.401	81.001	80.901	80.501	80.501	80.501	80.401	80.401	80.501	80.501	80.701	81.001	80.801	80.801	81.001	80.901	80.901	80.901	81.001	80.601	80.601	81.101	80.801	81.101	81.101	81.101	80.901	81.101	80.701	80.601	80.701	80.701	80.701	80.701	80.701	80.701
KM595176_Squash leaf curl virus isolate JO222	83.501	83.101	82.501	82.501	82.701	82.201	82.401	82.801	83.001	83.001	82.601	82.501	83.201	81.301	81.001	80.901	80.601	80.601	80.601	80.501	80.501	80.601	80.601	80.701	81.001	80.801	80.801	81.101	80.801	80.801	80.801	80.901	80.601	80.601	81.101	80.801	81.101	81.001	81.101	80.901	81.101	80.701	80.601	80.701	80.701	80.701	80.701	80.701	80.701
KM595097_Squash leaf curl virus isolate IL111	83.201	82.801	82.401	82.401	82.401	82.001	82.401	82.701	83.001	82.901	82.301	82.301	83.301	81.201	80.901	80.801	80.401	80.401	80.401	80.301	80.301	80.401	80.401	80.501	80.801	80.601	80.601	80.901	80.801	80.801	80.801	80.801	80.501	80.501	81.001	80.701	81.001	80.901	80.901	80.801	81.001	80.501	80.401	80.501	80.501	80.501	80.501	80.501	80.501
KM595177_Squash leaf curl virus isolate JO223	83.501	83.101	82.601	82.701	82.601	82.101	82.501	82.901	83.201	83.101	82.601	82.501	83.501	81.401	81.101	81.001	80.501	80.501	80.501	80.401	80.401	80.501	80.501	80.701	81.001	80.801	80.801	81.101	81.001	81.001	81.001	81.001	80.701	80.701	81.201	80.801	81.201	81.101	81.101	81.001	81.201	80.801	80.701	80.801	80.801	80.801	80.801	80.801	80.801
JX444577_Squash leaf curl virus isolate Homra	83.401	83.001	82.501	82.601	82.501	82.101	82.501	82.901	83.101	83.001	82.501	82.401	83.401	81.201	80.901	80.901	80.401	80.301	80.301	80.301	80.301	80.401	80.401	80.601	80.901	80.701	80.701	81.001	80.801	80.801	80.801	80.901	80.501	80.501	81.001	80.701	81.101	81.001	81.001	80.901	81.001	80.701	80.601	80.701	80.701	80.701	80.701	80.701	80.701
JX131281_Squash leaf curl virus	83.501	83.101	82.601	82.701	82.601	82.201	82.601	83.001	83.201	83.101	82.601	82.501	83.401	81.401	81.101	81.101	80.601	80.601	80.601	80.501	80.501	80.601	80.601	80.801	81.101	80.901	80.901	81.201	81.001	81.001	81.001	81.101	80.801	80.801	81.301	80.901	81.301	81.201	81.201	81.101	81.301	80.801	80.701	80.801	80.801	80.801	80.801	80.801	80.801
KM595103_Squash leaf curl virus isolate IL129	83.601	83.101	82.701	82.701	82.701	82.201	82.601	83.001	83.201	83.201	82.601	82.501	83.601	81.501	81.201	81.101	80.601	80.601	80.601	80.601	80.601	80.701	80.601	80.901	81.101	81.001	81.001	81.201	81.101	81.101	81.101	81.101	80.801	80.801	81.201	81.001	81.301	81.301	81.201	81.101	81.301	80.901	80.801	80.901	80.901	80.901	80.901	80.901	80.901
KM595181_Squash leaf curl virus isolate JO2116	83.501	83.101	82.601	82.701	82.601	82.201	82.601	82.901	83.201	83.201	82.601	82.601	83.501	81.401	81.201	81.101	80.601	80.601	80.601	80.601	80.601	80.701	80.601	80.901	81.101	81.001	81.001	81.201	81.101	81.101	81.101	81.101	80.801	80.801	81.301	81.001	81.301	81.301	81.201	81.101	81.301	80.901	80.801	80.901	80.901	80.901	80.901	80.901	80.901
KM595127_Squash leaf curl virus isolate IL3105	83.501	83.001	82.501	82.601	82.601	82.101	82.501	82.901	83.101	83.101	82.601	82.601	83.501	81.301	81.101	81.101	80.501	80.401	80.401	80.401	80.401	80.501	80.501	80.801	81.101	80.901	80.901	81.201	81.001	81.001	81.101	81.101	80.701	80.701	81.301	80.901	81.201	81.201	81.201	81.101	81.201	80.701	80.601	80.701	80.701	80.801	80.701	80.801	80.701
KM595102_Squash leaf curl virus isolate IL127	83.401	83.001	82.501	82.501	82.501	82.101	82.501	82.801	83.101	83.101	82.401	82.601	83.401	81.301	80.901	80.801	80.501	80.501	80.501	80.401	80.401	80.501	80.501	80.701	81.001	80.801	80.801	80.801	80.801	80.801	80.801	80.801	80.901	80.901	81.001	80.701	80.901	80.801	80.801	80.901	80.901	80.401	80.401	80.401	80.401	80.501	80.401	80.501	80.401
HG969277_Squash leaf curl virus	83.501	82.901	82.501	82.601	82.701	82.301	82.501	82.801	83.201	83.101	82.801	82.801	83.501	81.301	80.901	80.901	80.601	80.501	80.501	80.501	80.501	80.701	80.601	80.801	81.001	81.001	80.901	80.901	80.901	80.901	80.701	80.801	80.701	80.701	81.001	80.601	81.001	81.001	81.001	81.001	81.001	80.601	80.501	80.601	80.601	80.601	80.601	80.601	80.601
HG969276_Squash leaf curl virus	83.501	83.101	82.501	82.601	82.601	82.101	82.501	82.901	83.201	83.101	82.601	82.601	83.501	81.301	80.901	80.801	80.501	80.501	80.501	80.401	80.401	80.501	80.501	80.801	81.001	80.901	80.901	80.901	80.701	80.701	80.701	80.801	80.601	80.601	80.901	80.601	81.001	80.901	80.901	81.001	81.001	80.601	80.501	80.601	80.601	80.601	80.601	80.601	80.601
HG969275_Squash leaf curl virus	83.501	83.001	82.501	82.601	82.601	82.101	82.501	82.901	83.201	83.001	82.601	82.601	83.501	81.201	80.801	80.801	80.501	80.401	80.401	80.401	80.401	80.501	80.501	80.701	81.001	80.901	80.801	80.901	80.701	80.701	80.701	80.701	80.601	80.601	80.901	80.501	81.001	80.901	80.901	80.901	80.901	80.501	80.401	80.501	80.501	80.601	80.501	80.601	80.501
HG969273_Squash leaf curl virus	83.401	82.901	82.501	82.501	82.501	82.001	82.401	82.801	83.201	83.001	82.501	82.501	83.401	81.201	80.801	80.801	80.401	80.401	80.401	80.401	80.401	80.501	80.401	80.701	80.901	80.801	80.801	80.801	80.601	80.601	80.601	80.701	80.501	80.501	80.901	80.501	80.901	80.801	80.801	80.901	80.901	80.501	80.401	80.501	80.501	80.501	80.501	80.501	80.501
HG969274_Squash leaf curl virus	83.501	83.001	82.501	82.501	82.501	82.101	82.501	82.801	83.201	83.001	82.601	82.501	83.801	81.301	81.001	81.001	80.501	80.401	80.401	80.401	80.401	80.501	80.501	80.701	81.001	80.901	80.901	81.001	80.801	80.801	80.801	81.001	80.601	80.601	81.101	80.701	81.101	81.101	81.001	81.101	81.101	80.701	80.601	80.701	80.701	80.701	80.701	80.701	80.701
KM595182_Squash leaf curl virus isolate JO2118	83.601	83.101	82.601	82.601	82.601	82.101	82.501	82.901	83.201	83.101	82.601	82.601	83.601	81.401	81.101	81.101	80.601	80.501	80.501	80.501	80.501	80.601	80.601	80.801	81.101	80.901	80.901	81.201	81.001	81.001	81.001	81.101	80.701	80.701	81.201	80.901	81.201	81.201	81.201	81.101	81.201	80.801	80.701	80.801	80.801	80.801	80.801	80.801	80.801
KM595104_Squash leaf curl virus isolate IL241	83.501	83.001	82.501	82.601	82.601	82.101	82.601	82.901	83.101	83.101	82.501	82.501	83.401	81.401	81.201	81.101	80.601	80.601	80.601	80.601	80.601	80.701	80.601	80.901	81.101	81.001	81.001	81.201	81.101	81.101	81.001	81.101	80.801	80.801	81.301	81.001	81.301	81.301	81.201	81.101	81.301	80.901	80.801	80.901	80.901	80.901	80.901	80.901	80.901
KM595203_Squash leaf curl virus isolate JO3127	83.401	83.001	82.501	82.501	82.601	82.101	82.501	82.801	83.201	83.001	82.501	82.401	83.401	81.401	80.901	80.901	80.401	80.401	80.401	80.301	80.301	80.401	80.401	80.601	80.901	80.701	80.701	81.001	80.801	80.801	80.801	80.901	80.601	80.601	81.101	80.701	81.101	81.001	81.001	80.901	81.101	80.601	80.501	80.601	80.601	80.701	80.601	80.701	80.601
KM595110_Squash leaf curl virus isolate IL253	83.501	83.101	82.501	82.601	82.601	82.101	82.501	82.901	83.201	83.101	82.501	82.501	83.501	81.401	81.001	81.001	80.601	80.501	80.501	80.501	80.501	80.601	80.601	80.701	80.901	80.801	80.801	81.001	80.901	80.901	80.901	81.001	80.701	80.701	81.201	80.801	81.101	81.101	81.001	80.901	81.001	80.601	80.501	80.601	80.601	80.601	80.601	80.601	80.601
KM595204_Squash leaf curl virus isolate JO3132	83.501	83.001	82.501	82.601	82.601	82.101	82.501	82.901	83.101	83.001	82.601	82.501	83.601	81.401	81.101	81.001	80.501	80.501	80.501	80.401	80.401	80.501	80.501	80.701	81.001	80.801	80.801	81.101	81.001	81.001	81.001	81.001	80.701	80.701	81.201	80.801	81.201	81.101	81.101	81.001	81.201	80.701	80.701	80.701	80.701	80.801	80.701	80.801	80.701
KM595207_Squash leaf curl virus isolate JO3216	83.501	83.001	82.501	82.601	82.601	82.101	82.501	82.901	83.101	83.001	82.601	82.501	83.601	81.301	81.001	81.001	80.501	80.401	80.401	80.401	80.401	80.501	80.501	80.701	81.001	80.801	80.801	81.101	80.901	80.901	80.901	81.001	80.701	80.701	81.201	80.801	81.201	81.101	81.101	81.001	81.201	80.701	80.601	80.701	80.701	80.701	80.701	80.701	80.701
KM595184_Squash leaf curl virus isolate JO2122	83.501	83.101	82.601	82.701	82.601	82.201	82.601	82.901	83.201	83.101	82.601	82.601	83.501	81.401	81.101	81.101	80.601	80.501	80.501	80.501	80.501	80.601	80.601	80.801	81.101	80.901	80.901	81.201	81.001	81.001	81.001	81.101	80.701	80.701	81.201	80.901	81.201	81.201	81.201	81.101	81.201	80.801	80.701	80.801	80.801	80.801	80.801	80.801	80.801
KM595171_Squash leaf curl virus isolate JO1610	83.401	83.001	82.501	82.501	82.501	82.101	82.501	82.801	83.101	83.001	82.301	82.301	83.301	81.201	80.901	80.901	80.401	80.301	80.301	80.301	80.301	80.401	80.401	80.601	80.901	80.701	80.701	80.901	80.801	80.801	80.801	80.901	80.501	80.501	81.001	80.601	81.101	81.001	80.901	80.801	81.001	80.501	80.501	80.501	80.501	80.601	80.501	80.601	80.501
KM595180_Squash leaf curl virus isolate JO229	83.601	83.101	82.701	82.801	82.801	82.301	82.701	83.101	83.301	83.201	82.501	82.501	83.501	81.301	80.901	80.901	80.401	80.401	80.401	80.301	80.301	80.401	80.401	80.601	80.901	80.701	80.701	81.001	80.801	80.801	80.801	80.901	80.601	80.601	81.101	80.701	81.101	81.001	81.001	80.901	81.101	80.601	80.501	80.601	80.601	80.701	80.601	80.701	80.601
KM595096_Squash leaf curl virus isolate IL19	83.201	82.801	82.401	82.401	82.401	81.901	82.301	82.701	83.001	82.901	82.301	82.301	83.201	81.001	80.701	80.601	80.101	80.101	80.101	80.101	80.101	80.201	80.101	80.401	80.601	80.501	80.501	80.701	80.601	80.601	80.601	80.601	80.301	80.401	80.801	80.401	80.801	80.801	80.701	80.601	80.801	80.401	80.301	80.401	80.401	80.401	80.401	80.401	80.401
KM595121_Squash leaf curl virus isolate IL398	83.501	83.001	82.501	82.601	82.601	82.101	82.501	82.901	83.101	83.101	82.601	82.601	83.501	81.401	81.101	81.001	80.501	80.501	80.501	80.401	80.401	80.501	80.501	80.701	81.101	80.901	80.901	81.201	81.001	81.001	81.001	81.101	80.701	80.701	81.201	80.901	81.201	81.201	81.201	81.001	81.201	80.801	80.701	80.801	80.801	80.801	80.801	80.801	80.801
KM595188_Squash leaf curl virus isolate JO2139	83.401	83.001	82.501	82.601	82.601	82.101	82.501	82.901	83.101	83.101	82.501	82.501	83.501	81.301	80.901	80.901	80.401	80.401	80.401	80.301	80.301	80.401	80.401	80.601	80.901	80.801	80.701	81.001	80.801	80.801	80.801	80.901	80.601	80.601	81.101	80.701	81.101	81.001	81.001	80.901	81.101	80.601	80.501	80.601	80.601	80.701	80.601	80.701	80.601
KM595169_Squash leaf curl virus isolate JO1136	83.401	82.901	82.501	82.501	82.501	82.001	82.401	82.701	83.001	82.901	82.601	82.601	83.601	81.201	81.001	81.001	80.601	80.601	80.601	80.501	80.501	80.601	80.601	80.801	81.101	80.901	81.001	81.001	80.901	80.901	80.901	81.001	80.701	80.701	81.001	80.701	81.101	81.001	81.001	81.001	81.101	80.601	80.501	80.601	80.601	80.601	80.601	80.601	80.601
KM595165_Squash leaf curl virus isolate JO1129	83.401	82.901	82.501	82.501	82.501	82.001	82.401	82.801	83.101	83.001	82.501	82.501	83.501	81.201	81.101	81.001	80.501	80.501	80.501	80.401	80.401	80.501	80.501	80.701	81.001	80.801	80.801	81.101	81.001	81.001	81.001	81.001	80.701	80.701	81.201	80.801	81.201	81.101	81.101	81.001	81.201	80.701	80.701	80.701	80.701	80.801	80.701	80.801	80.701
KM595213_Squash leaf curl virus isolate JO3330	83.601	83.001	82.501	82.701	82.601	82.201	82.501	82.901	83.101	83.101	82.601	82.501	83.601	81.201	81.001	81.001	80.501	80.401	80.401	80.401	80.401	80.501	80.501	80.701	81.001	80.801	80.801	81.101	80.901	80.901	80.901	81.001	80.701	80.701	81.201	80.801	81.201	81.101	81.101	81.001	81.201	80.701	80.601	80.701	80.701	80.701	80.701	80.701	80.701
KM595172_Squash leaf curl virus isolate JO1617	83.501	83.001	82.501	82.701	82.601	82.101	82.501	82.901	83.101	83.101	82.601	82.501	83.501	81.301	81.001	81.001	80.501	80.401	80.401	80.401	80.401	80.501	80.501	80.701	81.001	80.801	80.801	81.101	80.901	80.901	80.901	81.001	80.701	80.701	81.201	80.801	81.201	81.101	81.101	81.001	81.201	80.701	80.601	80.701	80.701	80.701	80.701	80.701	80.701
KM595159_Squash leaf curl virus isolate JO1162	83.601	83.101	82.601	82.601	82.601	82.201	82.501	82.901	83.201	83.201	82.601	82.501	83.501	81.401	81.101	81.001	80.501	80.501	80.501	80.401	80.401	80.501	80.501	80.701	81.001	80.801	80.801	81.101	81.001	81.001	81.001	81.001	80.701	80.701	81.201	80.801	81.201	81.201	81.101	81.001	81.201	80.701	80.701	80.701	80.701	80.801	80.701	80.801	80.701
KM595107_Squash leaf curl virus isolate IL249	83.601	83.101	82.601	82.701	82.601	82.301	82.601	82.901	83.201	83.201	82.601	82.601	83.501	81.401	81.101	81.101	80.601	80.501	80.501	80.501	80.501	80.601	80.601	80.801	81.101	80.901	80.901	81.201	81.001	81.001	81.001	81.101	80.701	80.701	81.201	80.901	81.201	81.201	81.201	81.101	81.201	80.801	80.701	80.801	80.801	80.801	80.801	80.801	80.801
KM595190_Squash leaf curl virus isolate JO2213	83.301	82.701	82.301	82.301	82.501	82.101	82.301	82.601	82.901	82.901	82.601	82.601	83.201	81.201	80.901	80.901	80.401	80.401	80.401	80.401	80.401	80.501	80.401	80.601	80.901	80.701	80.701	81.001	81.001	81.001	81.001	81.101	80.801	80.801	81.201	80.901	81.201	81.201	81.201	81.001	81.201	80.601	80.501	80.601	80.601	80.601	80.601	80.601	80.601
KM595211_Squash leaf curl virus isolate JO3238	83.401	82.901	82.501	82.501	82.701	82.301	82.401	82.801	83.001	83.001	82.801	82.801	83.301	81.401	81.101	81.001	80.501	80.501	80.501	80.401	80.401	80.501	80.501	80.701	81.001	80.801	80.801	81.101	81.001	81.001	81.001	81.001	80.701	80.701	81.201	80.801	81.301	81.101	81.101	81.101	81.201	80.701	80.701	80.701	80.701	80.801	80.701	80.801	80.701
KM595161_Squash leaf curl virus isolate JO1164	83.501	82.901	82.501	82.501	82.601	82.201	82.501	82.801	83.101	83.101	82.401	82.501	83.401	81.401	80.901	80.901	80.401	80.401	80.401	80.301	80.301	80.401	80.401	80.601	80.901	80.701	80.701	81.001	80.801	80.801	80.801	80.901	80.601	80.601	81.101	80.701	81.101	81.001	81.001	80.901	81.101	80.601	80.501	80.601	80.601	80.701	80.601	80.701	80.601
KM595192_Squash leaf curl virus isolate JO2217	83.501	83.001	82.501	82.501	82.501	82.101	82.501	82.801	83.101	83.101	82.501	82.501	83.401	81.301	81.001	80.901	80.401	80.401	80.401	80.401	80.401	80.501	80.401	80.701	81.001	80.801	80.801	81.001	80.901	80.901	80.801	81.001	80.601	80.601	81.101	80.801	81.101	81.101	81.101	80.901	81.101	80.701	80.601	80.701	80.701	80.701	80.701	80.701	80.701
KM595212_Squash leaf curl virus isolate JO3323	83.501	83.101	82.701	82.701	82.701	82.201	82.601	83.001	83.201	83.201	82.501	82.601	83.601	81.501	81.001	81.001	80.501	80.501	80.501	80.401	80.401	80.501	80.501	80.701	81.001	81.001	80.801	81.001	80.901	80.901	81.001	81.101	80.801	80.701	81.201	80.801	81.101	81.001	81.001	80.901	81.101	80.601	80.501	80.601	80.601	80.701	80.601	80.701	80.601
KM595186_Squash leaf curl virus isolate JO2129	83.601	83.101	82.701	82.701	82.701	82.201	82.601	83.001	83.201	83.201	82.601	82.601	83.601	81.401	81.101	81.101	80.601	80.601	80.601	80.501	80.501	80.601	80.601	80.801	81.001	80.901	80.901	81.101	81.001	81.001	81.001	81.101	80.801	80.801	81.301	80.901	81.201	81.101	81.101	81.001	81.201	80.701	80.601	80.701	80.701	80.701	80.701	80.701	80.701
KM595113_Squash leaf curl virus isolate IL263	83.501	82.901	82.501	82.501	82.501	82.101	82.401	82.801	83.101	83.101	82.501	82.401	83.401	81.301	81.001	81.001	80.501	80.401	80.401	80.401	80.401	80.501	80.501	80.701	80.901	80.801	81.101	80.901	80.801	80.801	80.801	80.901	80.601	80.601	81.101	80.701	81.001	80.901	81.001	80.801	81.001	80.501	80.401	80.501	80.501	80.501	80.501	80.501	80.501
KM595128_Squash leaf curl virus isolate IL3106	83.501	83.001	82.501	82.601	82.601	82.101	82.501	82.901	83.101	83.101	82.501	82.501	83.401	81.401	81.001	81.001	80.501	80.401	80.401	80.401	80.401	80.501	80.501	80.701	81.001	80.801	80.801	81.101	80.901	80.901	80.901	81.001	80.701	80.701	81.201	80.801	81.201	81.101	81.101	81.001	81.201	80.701	80.601	80.701	80.701	80.701	80.701	80.701	80.701
KM595138_Squash leaf curl virus isolate LB3744	83.601	83.101	82.701	82.701	82.701	82.201	82.601	83.001	83.001	83.201	82.601	82.601	83.601	81.401	81.101	81.001	80.501	80.501	80.501	80.401	80.401	80.501	80.501	80.701	81.001	80.801	80.801	81.101	81.001	81.001	81.001	81.001	80.701	80.701	81.201	80.801	81.201	81.101	81.101	81.001	81.201	80.701	80.701	80.701	80.701	80.801	80.701	80.801	80.701
KM595100_Squash leaf curl virus isolate IL120	83.501	82.901	82.501	82.601	82.601	82.101	82.501	82.901	83.101	83.101	82.501	82.501	83.301	81.301	81.001	80.901	80.401	80.401	80.401	80.401	80.401	80.501	80.401	80.701	80.901	80.801	80.801	81.001	80.801	80.801	80.901	81.001	80.601	80.601	81.101	80.801	81.101	81.001	81.001	80.901	81.101	80.601	80.501	80.601	80.601	80.701	80.601	80.701	80.601
KM595120_Squash leaf curl virus isolate IL396	83.501	83.001	82.501	82.501	82.601	82.101	82.501	82.901	83.101	83.101	82.501	82.401	83.301	81.301	81.001	80.901	80.401	80.401	80.401	80.401	80.401	80.501	80.401	80.701	81.001	80.801	80.801	81.001	80.901	80.901	80.901	81.001	80.601	80.601	81.101	80.801	81.101	81.101	81.101	80.901	81.101	80.701	80.601	80.701	80.701	80.701	80.701	80.701	80.701
KM595137_Squash leaf curl virus isolate LB3743	83.501	83.001	82.501	82.701	82.601	82.101	82.501	82.901	83.201	83.101	82.501	82.401	83.401	81.401	81.001	81.001	80.401	80.401	80.401	80.401	80.401	80.501	80.401	80.701	81.001	80.801	81.001	81.101	80.901	80.901	80.901	81.001	80.801	80.801	81.101	80.801	81.201	81.101	81.101	81.101	81.201	80.701	80.601	80.701	80.701	80.701	80.701	80.701	80.701
KM595123_Squash leaf curl virus isolate IL3100	83.401	82.901	82.501	82.501	82.501	82.001	82.401	82.801	83.001	83.001	82.401	82.401	83.401	81.201	80.901	80.901	80.401	80.401	80.401	80.301	80.301	80.401	80.401	80.601	81.001	80.701	81.001	81.001	80.801	80.801	80.801	80.901	80.601	80.601	81.101	80.701	81.101	81.001	81.001	80.901	81.101	80.601	80.501	80.601	80.601	80.701	80.601	80.701	80.601
KM595101_Squash leaf curl virus isolate IL123	83.501	83.001	82.601	82.601	82.601	82.101	82.501	82.901	83.201	83.101	82.501	82.501	83.301	81.301	81.001	81.001	80.501	80.401	80.401	80.401	80.401	80.501	80.501	80.701	81.001	80.801	80.801	81.101	80.901	80.901	80.901	81.001	80.601	80.601	81.101	80.801	81.101	81.101	81.101	81.001	81.101	80.701	80.601	80.701	80.701	80.701	80.701	80.701	80.701
KM595118_Squash leaf curl virus isolate IL391	83.401	82.901	82.501	82.501	82.501	82.001	82.401	82.801	83.101	82.901	82.501	82.501	83.401	81.501	81.001	81.001	80.701	80.601	80.601	80.601	80.601	80.701	80.701	80.701	81.201	81.001	81.001	81.001	80.901	80.901	80.901	80.901	80.901	80.901	81.101	80.801	81.101	81.101	81.101	81.101	81.201	80.701	80.601	80.701	80.701	80.701	80.701	80.701	80.701
KM595126_Squash leaf curl virus isolate IL3103	83.501	83.101	82.601	82.601	82.601	82.101	82.501	82.901	83.201	83.101	82.601	82.601	83.401	81.501	81.001	81.001	80.701	80.701	80.701	80.601	80.601	80.701	80.701	80.701	81.201	81.001	81.001	81.101	80.901	80.901	80.901	81.001	80.901	80.901	81.201	80.801	81.201	81.101	81.101	81.101	81.201	80.701	80.601	80.701	80.701	80.701	80.701	80.701	80.701
KM595189_Squash leaf curl virus isolate JO2211	83.601	83.101	82.701	82.801	82.801	82.301	82.701	83.101	83.201	83.201	82.601	82.701	83.601	81.501	81.101	81.001	80.801	80.701	80.701	80.701	80.701	80.801	80.801	80.801	81.301	81.101	81.101	81.201	81.001	81.001	81.001	81.101	81.001	81.001	81.201	80.901	81.201	81.201	81.201	81.201	81.201	80.901	80.801	80.901	80.901	80.901	80.901	80.901	80.901
KM595209_Squash leaf curl virus isolate JO3227	83.701	83.101	82.601	82.601	82.601	82.201	82.601	82.901	83.101	83.101	82.501	82.501	83.501	81.501	81.101	81.001	80.801	80.701	80.701	80.701	80.701	80.801	80.801	80.801	81.201	81.101	81.101	81.201	81.001	81.001	81.101	81.101	81.001	81.001	81.201	80.801	81.201	81.201	81.201	81.201	81.201	80.901	80.801	80.901	80.901	80.901	80.901	80.901	80.901
KM595195_Squash leaf curl virus isolate JO322	83.401	82.901	82.501	82.401	82.501	82.001	82.401	82.801	83.201	83.001	82.601	82.601	83.501	81.501	81.001	80.901	80.701	80.601	80.601	80.601	80.601	80.701	80.701	80.701	81.201	81.001	81.001	81.001	80.901	80.901	80.901	80.901	80.901	80.901	81.101	80.801	81.101	81.101	81.001	81.101	81.101	80.701	80.601	80.701	80.701	80.701	80.701	80.701	80.701
KM595155_Squash leaf curl virus isolate JO1113	83.401	82.901	82.501	82.501	82.501	82.001	82.401	82.801	82.901	83.001	82.401	82.301	83.401	81.201	80.601	80.501	80.301	80.201	80.201	80.201	80.201	80.301	80.301	80.601	80.901	80.701	80.601	80.701	80.501	80.501	80.501	80.601	80.501	80.501	80.701	80.401	80.701	80.601	80.601	80.701	80.701	80.401	80.301	80.401	80.401	80.401	80.401	80.401	80.401
KM595194_Squash leaf curl virus isolate JO2220	83.301	82.901	82.401	82.401	82.401	82.001	82.401	82.701	83.001	82.901	82.401	82.401	83.301	81.301	81.001	81.001	80.701	80.601	80.601	80.601	80.601	80.701	80.701	80.701	81.201	81.001	81.001	81.001	80.901	80.901	80.901	80.901	80.901	80.901	81.101	80.701	81.001	81.001	81.001	81.001	81.001	80.701	80.601	80.701	80.701	80.701	80.701	80.701	80.701
KM595198_Squash leaf curl virus isolate JO3112	83.401	82.901	82.501	82.501	82.501	82.001	82.401	82.801	83.101	83.001	82.501	82.501	83.401	81.401	81.001	80.901	80.701	80.601	80.601	80.601	80.601	80.701	80.701	80.701	81.201	81.001	81.001	81.001	80.901	80.901	80.901	80.901	80.901	80.901	81.101	80.801	81.101	81.101	81.001	81.101	81.101	80.701	80.601	80.701	80.701	80.701	80.701	80.701	80.701
KM595164_Squash leaf curl virus isolate JO1124	83.401	83.001	82.501	82.501	82.501	82.101	82.501	82.801	83.101	83.001	82.701	82.801	83.601	81.601	81.101	81.101	80.701	80.701	80.701	80.701	80.701	80.801	80.701	80.801	81.201	81.101	81.101	81.201	81.001	81.001	81.001	81.101	81.001	81.001	81.201	80.901	81.301	81.201	81.201	81.201	81.301	80.701	80.701	80.701	80.701	80.801	80.701	80.801	80.701
KM595116_Squash leaf curl virus isolate IL382	83.401	82.901	82.401	82.501	82.501	82.001	82.401	82.701	83.101	82.901	82.401	82.501	83.301	81.401	81.101	81.001	80.801	80.701	80.701	80.701	80.701	80.801	80.801	80.801	81.301	81.101	81.101	81.201	81.001	81.001	80.901	81.001	80.901	80.901	81.101	80.901	81.201	81.201	81.201	81.201	81.201	80.701	80.701	80.701	80.701	80.801	80.701	80.801	80.801
KM595117_Squash leaf curl virus isolate IL390	83.201	82.701	82.201	82.301	82.401	82.001	82.201	82.501	82.801	82.701	82.301	82.301	83.201	81.001	80.701	80.701	80.201	80.201	80.201	80.101	80.101	80.201	80.201	80.401	80.701	80.501	80.501	80.801	80.601	80.601	80.601	80.701	80.401	80.401	80.801	80.501	80.901	80.801	80.801	80.701	80.901	80.401	80.301	80.401	80.401	80.401	80.401	80.401	80.401
KM595105_Squash leaf curl virus isolate IL243	83.101	82.601	82.201	82.201	82.401	82.001	82.101	82.401	82.701	82.701	82.401	82.301	83.101	81.201	81.101	81.001	80.501	80.501	80.501	80.401	80.401	80.601	80.501	80.701	81.001	80.801	80.801	81.101	81.301	81.301	81.001	81.001	80.701	80.701	81.201	80.801	81.201	81.101	81.101	81.001	81.201	80.701	80.701	80.701	80.701	80.801	80.701	80.801	80.701
KM595106_Squash leaf curl virus isolate IL246	83.301	82.901	82.401	82.401	82.401	82.001	82.401	82.701	83.001	82.901	82.301	82.301	83.301	81.101	80.701	80.701	80.301	80.301	80.301	80.201	80.201	80.301	80.301	80.501	80.801	80.601	80.701	80.801	80.601	80.601	80.601	80.701	80.501	80.501	80.901	80.501	80.901	80.801	80.801	80.801	80.901	80.401	80.301	80.401	80.401	80.401	80.401	80.401	80.401
KM595112_Squash leaf curl virus isolate IL258	83.301	82.701	82.401	82.301	82.301	81.801	82.201	82.601	82.901	82.801	82.301	82.401	83.301	81.301	80.901	80.901	80.601	80.501	80.501	80.501	80.501	80.601	80.601	80.601	81.101	80.901	80.901	81.001	80.801	80.801	80.801	80.901	80.901	80.801	81.001	80.701	81.001	81.001	81.001	81.001	81.001	80.601	80.501	80.601	80.601	80.601	80.601	80.601	80.601
KM595115_Squash leaf curl virus isolate IL274	83.501	83.101	82.701	82.701	82.701	82.201	82.601	83.001	83.301	83.101	82.501	82.501	83.501	81.301	81.101	81.001	80.501	80.501	80.501	80.401	80.401	80.501	80.501	80.701	81.001	80.801	80.801	81.101	81.001	81.001	81.001	81.101	80.701	80.701	81.201	80.901	81.201	81.201	81.201	81.001	81.201	80.701	80.701	80.701	80.701	80.801	80.701	80.801	80.701
KM595119_Squash leaf curl virus isolate IL394	83.301	82.901	82.401	82.401	82.401	82.001	82.301	82.701	83.001	82.901	82.501	82.501	83.401	81.401	80.901	80.901	80.601	80.601	80.601	80.501	80.501	80.601	80.601	80.701	81.201	81.001	80.901	81.001	80.801	80.801	80.901	80.901	80.801	80.801	81.001	80.801	81.101	81.001	81.001	81.001	81.201	80.601	80.501	80.601	80.601	80.701	80.601	80.701	80.601
KM595205_Squash leaf curl virus isolate JO3139	83.501	83.001	82.601	82.601	82.601	82.101	82.601	82.901	83.201	83.301	82.601	82.501	83.501	81.301	81.101	81.101	80.601	80.501	80.501	80.601	80.601	80.701	80.601	80.801	81.101	80.901	80.901	81.201	81.001	81.001	81.001	81.101	80.801	80.801	81.301	80.901	81.201	81.201	81.201	81.101	81.201	80.801	80.701	80.801	80.801	80.801	80.801	80.801	80.801
KM595234_Squash leaf curl virus isolate PA3T2	83.601	83.101	82.501	82.501	82.601	82.101	82.501	82.901	83.001	83.001	82.301	82.401	83.301	81.101	80.901	80.901	80.401	80.401	80.401	80.401	80.401	80.501	80.401	80.501	80.901	80.701	80.801	80.901	80.801	80.801	80.801	80.801	80.601	80.601	81.001	80.601	81.001	81.001	80.901	81.001	81.001	80.501	80.501	80.501	80.501	80.601	80.501	80.601	80.501
KM595166_Squash leaf curl virus isolate JO1130	83.601	83.101	82.601	82.601	82.601	82.101	82.501	82.901	83.201	83.101	82.601	82.601	83.501	81.401	81.101	81.101	80.601	80.601	80.601	80.501	80.501	80.601	80.601	80.801	81.101	80.901	80.901	81.201	81.001	81.001	81.001	81.101	80.801	80.801	81.301	80.901	81.301	81.201	81.201	81.101	81.301	80.801	80.701	80.801	80.801	80.901	80.801	80.901	80.801
KM595160_Squash leaf curl virus isolate JO1163	83.501	83.101	82.601	82.601	82.601	82.101	82.501	82.901	83.201	83.101	82.601	82.501	83.501	81.401	81.101	81.001	80.501	80.501	80.501	80.401	80.401	80.501	80.501	80.701	81.001	80.801	80.801	81.101	81.001	81.001	81.001	81.001	80.701	80.701	81.201	80.801	81.201	81.101	81.101	81.001	81.201	80.701	80.701	80.701	80.701	80.801	80.701	80.801	80.701
KM595109_Squash leaf curl virus isolate IL252	83.501	83.101	82.601	82.701	82.601	82.201	82.601	82.901	83.201	83.101	82.601	82.601	83.501	81.401	81.101	81.101	80.601	80.501	80.501	80.501	80.501	80.601	80.601	80.801	81.101	80.901	80.901	81.201	81.001	81.001	81.001	81.101	80.701	80.701	81.201	80.901	81.201	81.201	81.201	81.101	81.201	80.801	80.701	80.801	80.801	80.801	80.801	80.801	80.801
KM595168_Squash leaf curl virus isolate JO1135	83.501	83.101	82.601	82.601	82.701	82.201	82.601	82.901	83.201	83.201	82.701	82.701	83.601	81.401	81.101	81.001	80.501	80.501	80.501	80.401	80.401	80.501	80.501	80.701	81.001	80.801	80.801	81.101	81.001	81.001	81.001	81.001	80.701	80.701	81.201	80.801	81.201	81.101	81.101	81.001	81.201	80.701	80.701	80.701	80.701	80.801	80.701	80.801	80.701
KM595201_Squash leaf curl virus isolate JO3120	83.501	83.101	82.601	82.601	82.601	82.101	82.501	82.901	83.201	83.101	82.601	82.501	83.501	81.401	81.101	81.001	80.501	80.501	80.501	80.401	80.401	80.501	80.501	80.701	81.001	80.801	80.801	81.101	81.001	81.001	81.001	81.001	80.701	80.701	81.201	80.801	81.201	81.101	81.101	81.001	81.201	80.701	80.701	80.701	80.701	80.801	80.701	80.801	80.701
KM595114_Squash leaf curl virus isolate IL273	83.501	83.101	82.601	82.601	82.601	82.101	82.501	82.901	83.201	83.101	82.601	82.501	83.501	81.401	81.101	81.001	80.501	80.501	80.501	80.401	80.401	80.501	80.501	80.701	81.001	80.801	80.801	81.101	81.001	81.001	81.001	81.001	80.701	80.701	81.201	80.801	81.201	81.101	81.101	81.001	81.201	80.701	80.701	80.701	80.701	80.801	80.701	80.801	80.701
KM595162_Squash leaf curl virus isolate JO1168	83.401	83.001	82.501	82.501	82.701	82.201	82.501	82.801	83.201	83.001	82.501	82.401	83.401	81.301	80.801	80.701	80.401	80.401	80.401	80.401	80.401	80.501	80.401	80.601	81.001	80.801	80.801	80.801	80.701	80.701	80.701	80.701	80.701	80.601	80.901	80.501	80.901	80.901	80.801	80.901	80.901	80.401	80.401	80.401	80.401	80.501	80.401	80.501	80.401
Cucumber chlorotic leaf virus isolate Colima	81.001	80.901	80.001	79.801	80.001	79.901	80.001	79.901	79.901	80.101	80.701	80.801	80.601	79.201	79.001	79.001	78.901	78.901	78.901	78.801	78.801	78.901	78.901	78.701	78.901	78.701	78.801	78.601	79.101	79.101	79.001	78.901	79.101	79.501	79.301	79.001	79.301	79.101	78.901	79.001	79.001	79.001	78.901	79.001	79.001	79.001	78.901	78.901	78.901
NC 043524_Bean leaf crumple virus isolate HA	83.001	82.701	82.401	82.301	82.201	81.901	82.301	82.201	82.601	82.401	84.101	84.201	82.801	81.401	80.501	80.501	80.501	80.501	80.501	80.401	80.401	80.601	80.501	80.601	80.501	80.701	80.601	80.701	81.201	81.201	80.701	80.601	80.601	80.801	80.801	80.701	81.001	80.801	81.001	80.801	80.801	80.301	80.301	80.301	80.401	80.401	80.301	80.401	80.301
AF110189_Bean calico mosaic virus	82.001	82.101	81.801	81.401	81.601	81.201	81.501	81.501	81.601	81.301	81.901	81.901	82.201	81.301	81.001	81.001	80.401	80.401	80.401	80.401	80.401	80.401	80.401	80.501	80.801	80.901	81.101	80.401	80.301	80.301	79.901	80.001	80.201	80.301	80.101	80.301	80.701	80.501	80.501	80.801	80.501	80.701	80.601	80.701	80.701	80.701	80.601	80.701	80.701
MH359392_Cabbage leaf curl virus isolate EcuadorEl Oro	82.501	82.601	82.301	81.901	81.901	81.701	81.901	81.901	81.901	81.701	83.601	83.101	83.201	82.601	81.401	81.501	81.201	81.101	81.101	81.101	81.101	81.101	81.201	81.101	81.401	81.301	81.301	81.301	81.601	81.601	81.401	81.401	81.401	81.401	81.801	81.501	82.001	81.601	81.701	81.801	81.901	81.301	81.201	81.301	81.401	81.401	81.201	81.201	81.201
MH359396_Cabbage leaf curl virus isolate EcuadorGuayas	82.501	82.601	82.301	81.901	81.901	81.701	81.901	81.901	81.901	81.701	83.401	82.901	83.201	82.501	81.301	81.401	81.001	81.001	81.001	81.001	81.001	81.001	81.001	81.001	81.401	81.201	81.301	81.201	81.501	81.501	81.301	81.201	81.401	81.201	81.601	81.401	81.901	81.401	81.601	81.701	81.801	81.201	81.101	81.201	81.201	81.401	81.101	81.101	81.101
MH359390_Cabbage leaf curl virus isolate EcuadorEl Oro EC1Phaseolus vulgaris	82.501	82.701	82.401	81.901	82.001	81.701	81.901	82.001	82.001	81.801	83.501	83.101	83.301	82.501	81.401	81.501	81.201	81.101	81.101	81.101	81.101	81.101	81.201	81.101	81.401	81.301	81.301	81.301	81.601	81.601	81.401	81.401	81.501	81.301	81.801	81.501	82.101	81.601	81.701	81.801	82.001	81.301	81.201	81.301	81.401	81.501	81.201	81.201	81.201
MH359394_Cabbage leaf curl virus isolate EcuadorGuayas	82.701	82.901	82.601	82.101	82.201	82.001	82.101	82.201	82.201	81.801	83.501	83.101	83.301	82.601	81.401	81.501	81.201	81.201	81.201	81.101	81.101	81.101	81.201	81.201	81.501	81.301	81.401	81.401	81.701	81.701	81.401	81.401	81.501	81.401	81.801	81.601	82.101	81.601	81.801	81.901	82.001	81.301	81.201	81.301	81.401	81.601	81.301	81.301	81.201
MH248136_Cabbage leaf curl virus isolate E11	82.601	82.501	82.401	82.001	82.001	81.801	82.001	82.001	82.001	81.701	83.101	82.901	83.101	82.501	81.401	81.501	81.201	81.101	81.101	81.101	81.101	81.101	81.201	81.201	81.201	81.201	81.301	81.201	81.601	81.601	81.401	81.301	81.301	81.201	81.701	81.501	81.901	81.501	81.601	81.701	81.801	81.301	81.301	81.301	81.401	81.301	81.301	81.301	81.301
KT381193_Rhynchosia golden mosaic Yucatan virus isolate 24	82.201	82.401	83.001	82.601	82.601	82.501	82.301	82.501	82.701	82.501	82.901	82.801	82.201	81.001	80.501	80.701	80.401	80.401	80.401	80.501	80.501	80.601	80.401	80.301	80.901	80.401	80.301	80.701	80.801	80.801	80.501	80.501	80.401	80.401	80.901	80.501	81.101	80.601	80.801	80.901	80.801	80.401	80.301	80.401	80.401	80.801	80.301	80.301	80.301
KT192632_Rhynchosia golden mosaic Yucatan virus isolate HCU2015	81.901	82.101	82.701	82.301	82.301	82.201	82.001	82.201	82.301	82.101	82.801	82.701	82.201	80.801	80.301	80.401	80.301	80.301	80.301	80.501	80.501	80.501	80.301	80.201	80.701	80.101	80.101	80.401	80.601	80.601	80.201	80.301	80.201	80.101	80.701	80.201	80.801	80.401	80.501	80.701	80.501	80.001	79.901	80.001	80.101	80.501	80.001	80.001	79.901
KP641349_Rhynchosia golden mosaic Yucatan virus	82.201	82.501	83.001	82.501	82.601	82.401	82.401	82.601	82.601	82.301	83.501	83.101	82.701	81.201	80.801	80.901	80.701	80.601	80.601	80.801	80.801	80.801	80.701	80.701	81.001	80.601	80.701	81.001	80.901	80.901	80.601	80.701	80.601	80.501	81.001	80.901	81.401	80.901	81.201	81.301	81.201	80.401	80.401	80.401	80.501	80.701	80.401	80.401	80.401
KP641347_Rhynchosia golden mosaic Yucatan virus clone RhyBodA12	82.501	82.201	82.601	82.301	82.101	81.901	82.101	82.201	82.301	82.001	83.101	82.701	82.201	81.601	80.701	80.801	80.601	80.501	80.501	80.501	80.501	80.501	80.601	80.601	80.801	80.601	80.701	80.701	80.901	80.901	80.701	80.601	80.701	80.801	80.701	80.501	81.101	80.801	80.801	80.701	80.801	80.401	80.401	80.401	80.501	80.501	80.401	80.401	80.401
EU021216_Rhynchosia golden mosaic Yucatan virus	81.701	82.101	82.301	82.101	82.301	81.801	82.001	82.101	82.501	82.101	82.901	82.501	82.501	80.901	80.501	80.601	80.301	80.301	80.301	80.301	80.301	80.301	80.301	80.301	80.701	80.601	80.401	80.701	80.701	80.701	80.301	80.401	80.501	80.301	80.401	80.201	81.001	80.601	80.801	80.901	80.601	80.701	80.601	80.701	80.901	80.801	80.801	80.701	80.601
GQ352453_Rhynchosia golden mosaic Yucatan virus clone DesmC6	81.801	81.901	82.101	81.701	82.201	81.701	82.201	82.001	82.001	81.901	82.801	82.501	82.501	81.001	80.601	80.701	80.501	80.501	80.501	80.401	80.401	80.401	80.501	80.401	80.701	80.501	80.601	80.701	80.701	80.701	80.601	80.501	80.601	80.101	80.701	80.301	81.001	80.601	80.901	80.801	80.801	80.101	80.001	80.101	80.401	80.601	80.301	80.101	80.001
DQ178612_Cabbage leal curl virus isolate Jamaica clone pCRFA13	82.101	82.401	82.001	81.901	81.901	81.601	81.901	81.801	81.901	81.201	81.901	81.601	81.901	81.001	80.901	81.001	80.701	80.701	80.701	80.601	80.601	80.601	80.701	80.501	80.801	80.301	80.301	80.501	80.801	80.801	80.601	80.501	80.701	80.601	80.801	80.301	80.801	80.701	80.701	80.701	80.501	80.301	80.201	80.301	80.301	80.201	80.201	80.201	80.201
U65529_Cabbage leaf curl virus	81.501	81.801	81.701	81.501	81.401	81.001	81.301	81.401	81.401	80.901	81.801	81.301	81.301	80.901	80.201	80.301	80.101	80.001	80.101	80.001	80.001	80.001	80.001	79.901	79.801	79.801	79.901	80.001	80.201	80.201	80.001	80.001	80.101	80.001	80.301	79.901	80.101	80.101	80.001	80.001	80.001	80.201	80.101	80.201	80.201	80.201	80.001	80.101	80.101
NC 038802_Rhynchosia golden mosaic Sinaloa virus	81.001	81.501	81.601	81.101	81.701	81.301	81.301	81.401	81.201	81.101	82.101	81.701	81.301	79.701	79.601	79.701	79.501	79.401	79.401	79.401	79.401	79.401	79.501	79.101	79.301	79.201	79.201	79.201	79.501	79.501	79.401	79.301	79.401	79.401	79.701	79.201	79.601	79.401	79.501	79.401	79.701	79.601	79.501	79.601	79.501	79.401	79.401	79.501	79.501
MK618662_Rhynchosia golden mosaic Sinaloa virus isolate LV15Rm02	82.301	82.101	82.501	81.901	82.201	81.801	82.401	82.201	82.001	82.401	83.201	83.001	82.101	81.301	80.601	80.601	80.101	80.001	80.001	80.001	80.001	80.001	80.101	80.101	80.501	80.501	80.501	80.401	80.801	80.801	80.501	80.501	80.401	80.501	80.601	80.401	80.801	80.601	80.701	80.801	80.601	80.301	80.201	80.301	80.301	80.301	80.201	80.201	80.201
LN848792_Pepper golden mosaic virus	79.201	79.101	79.201	79.201	79.201	78.701	79.101	79.101	79.601	78.801	80.301	80.401	79.301	78.601	78.501	78.501	78.101	78.101	78.101	78.001	78.001	78.001	78.101	77.901	78.401	78.201	78.201	78.001	78.201	78.201	78.101	78.401	78.401	78.001	78.401	78.201	78.301	78.301	78.101	78.501	78.101	78.301	78.301	78.401	78.401	78.401	78.301	78.301	78.201
KT099129_Tomato severe leaf curl virus isolate GtTo2C1	81.201	81.601	80.801	80.501	80.701	80.401	80.501	80.601	80.501	80.801	81.501	81.401	81.201	79.801	79.701	79.901	79.401	79.401	79.401	79.301	79.301	79.501	79.401	79.401	79.301	79.501	79.601	79.401	79.601	79.601	79.401	79.401	79.401	79.601	79.501	79.801	79.901	79.601	79.801	79.801	79.901	79.201	79.101	79.201	79.301	79.301	79.201	79.101	79.101
DQ347947_Tomato severe leaf curl virus isolate RioverdeSLP2	81.201	81.201	80.801	80.501	80.501	80.101	80.201	80.701	80.301	80.601	81.201	81.101	81.101	80.201	79.901	79.901	79.401	79.401	79.401	79.301	79.301	79.501	79.401	79.501	79.301	79.401	79.501	79.401	79.501	79.501	79.301	79.401	79.301	79.601	79.501	79.601	79.801	79.601	79.801	79.701	80.001	79.401	79.301	79.401	79.401	79.501	79.201	79.401	79.301
DQ347946_Tomato severe leaf curl virus isolate RioverdeSLP1	80.901	81.201	80.701	80.301	80.401	80.001	80.201	80.201	80.301	80.301	81.301	81.101	80.901	79.801	79.701	79.801	79.401	79.401	79.401	79.301	79.301	79.401	79.401	79.401	79.401	79.501	79.501	79.201	79.401	79.401	79.201	79.201	79.201	79.301	79.501	79.401	79.601	79.401	79.501	79.601	79.501	79.401	79.301	79.401	79.401	79.501	79.401	79.401	79.301
AF130415_Tomato severe leaf curl virus[Guatemala 961]	81.201	81.401	80.501	80.201	80.401	80.101	80.201	80.301	80.201	80.701	81.401	81.301	81.001	80.001	79.701	79.801	79.701	79.601	79.601	79.601	79.601	79.701	79.701	79.401	79.401	79.401	79.501	79.301	79.501	79.501	79.201	79.301	79.301	79.501	79.601	79.601	79.701	79.501	79.701	79.801	79.901	79.301	79.301	79.301	79.401	79.401	79.401	79.301	79.301
KT099119_Tomato severe leaf curl virus isolate GtSqC17	81.101	81.601	80.901	80.701	80.801	80.501	80.701	80.701	80.701	80.801	81.301	81.201	81.101	80.001	79.301	79.501	79.201	79.101	79.101	79.201	79.201	79.301	79.201	79.101	79.101	79.101	79.101	79.201	79.401	79.401	79.201	79.201	79.101	79.301	79.401	79.401	79.501	79.401	79.501	79.501	79.701	78.901	78.901	78.901	79.001	79.001	79.001	78.901	78.901
JN676151_Tomato severe leaf curl virus-SLP 3	81.501	81.301	80.801	80.401	80.601	80.301	80.401	80.601	80.401	80.801	81.201	81.101	81.201	80.501	79.901	80.001	79.401	79.301	79.301	79.301	79.301	79.401	79.401	79.401	79.401	79.301	79.401	79.301	79.501	79.501	79.401	79.401	79.301	79.601	79.601	79.501	79.701	79.501	79.601	79.601	79.801	79.501	79.501	79.501	79.601	79.601	79.401	79.501	79.501
JN680352_Tomato severe leaf curl virus-Huasteca	80.501	79.801	79.201	78.801	79.001	79.001	78.801	78.701	78.901	79.401	80.101	80.201	79.901	79.001	79.001	79.101	78.501	78.401	78.401	78.401	78.401	78.501	78.501	79.001	78.701	78.701	78.901	78.601	78.801	78.801	78.401	78.401	78.601	78.401	78.601	78.701	79.001	78.701	78.701	78.801	78.801	78.201	78.101	78.301	78.301	78.401	78.301	78.201	78.401
AJ508785_Tomato severe leaf curl virus	80.701	80.301	79.701	79.301	79.501	79.601	79.301	79.301	79.301	80.101	80.201	80.201	80.101	79.101	79.001	79.201	78.801	78.801	78.801	78.701	78.701	78.801	78.801	78.901	78.701	78.801	78.701	78.801	79.101	79.101	78.701	78.901	78.401	78.501	78.501	78.701	78.901	78.601	78.501	78.801	78.801	78.501	78.401	78.501	78.501	78.601	78.401	78.401	78.701
AJ508784_Tomato severe leaf curl virus	80.701	80.301	79.701	79.301	79.501	79.601	79.301	79.301	79.301	80.101	80.201	80.101	80.001	79.101	79.001	79.101	78.801	78.801	78.801	78.701	78.701	78.901	78.801	78.901	78.701	78.801	78.701	78.801	79.201	79.201	78.801	78.901	78.501	78.601	78.601	78.701	78.901	78.701	78.601	78.801	78.801	78.501	78.401	78.501	78.501	78.601	78.401	78.401	78.701
JN381813_Tomato rugose yellow leaf curl virus isolate U1 clone 1	78.901	78.601	77.701	77.501	77.501	77.601	77.601	77.801	77.701	77.701	77.801	77.801	77.201	77.801	77.201	77.301	77.101	77.101	77.101	77.001	77.001	76.801	77.101	77.001	77.501	77.301	77.201	77.301	76.601	76.601	76.601	76.701	76.701	76.701	76.901	77.301	76.901	76.601	76.901	76.901	76.801	77.001	77.001	77.001	77.101	77.201	77.001	77.101	77.001
JN381815_Tomato rugose yellow leaf curl virus isolate U1 clone 2	78.801	78.601	77.701	77.501	77.501	77.601	77.601	77.701	77.701	77.601	77.801	77.801	77.201	77.801	77.201	77.201	77.101	77.001	77.101	76.901	76.901	76.801	77.101	77.001	77.501	77.201	77.201	77.301	76.601	76.601	76.601	76.601	76.601	76.601	76.901	77.301	76.801	76.601	76.901	76.801	76.701	77.001	77.001	77.001	77.101	77.201	77.001	77.001	77.001
JN381825_Tomato rugose yellow leaf curl virus isolate U5 clone 1	78.901	78.301	77.401	77.101	77.401	77.301	77.001	77.401	77.301	77.101	78.201	78.501	77.801	78.001	78.001	78.101	77.701	77.701	77.701	77.601	77.601	77.501	77.701	77.401	77.901	77.801	78.101	77.801	77.001	77.001	77.201	77.001	77.101	77.401	77.301	77.601	77.701	77.301	77.801	77.801	77.901	77.801	77.701	77.801	78.001	78.101	78.001	77.701	77.701
JN381827_Tomato rugose yellow leaf curl virus isolate U5 clone 2	78.801	78.201	77.301	77.001	77.301	77.301	76.901	77.301	77.201	77.101	78.101	78.501	77.701	77.901	78.001	78.001	77.601	77.601	77.601	77.501	77.501	77.401	77.601	77.301	77.901	77.801	78.001	77.701	76.901	76.901	77.201	76.901	77.101	77.301	77.201	77.601	77.601	77.201	77.701	77.801	77.801	77.701	77.601	77.701	78.001	78.001	78.001	77.601	77.601
KC706588_Tomato common mosaic virus isolate BR Pda56 05	79.701	79.601	79.201	79.001	79.001	79.001	78.701	79.001	78.901	78.701	78.601	78.801	78.901	78.601	78.701	78.701	78.201	78.201	78.201	78.101	78.101	78.101	78.201	78.301	78.701	78.801	79.001	78.501	78.901	78.901	78.301	78.401	78.201	78.401	78.501	78.501	78.801	79.101	78.801	78.701	78.801	78.301	78.301	78.301	78.201	78.201	78.201	78.301	78.201
KC706589_Tomato common mosaic virus isolate BR Pda9 05	79.601	79.501	79.101	78.901	78.901	78.801	78.601	78.801	78.801	78.601	78.501	78.601	79.001	78.601	78.601	78.701	78.201	78.101	78.101	78.101	78.101	78.101	78.201	78.201	78.701	78.801	79.001	78.501	78.801	78.801	78.301	78.401	78.201	78.401	78.501	78.501	78.801	79.001	78.801	78.701	78.801	78.301	78.201	78.301	78.201	78.201	78.101	78.201	78.201
KC706580_Tomato common mosaic virus isolate BR Pda10 05	79.701	79.601	79.201	78.901	79.001	78.901	78.701	78.901	78.901	78.601	78.601	78.701	78.901	78.601	78.601	78.701	78.201	78.101	78.101	78.101	78.101	78.101	78.201	78.201	78.701	78.801	79.001	78.501	78.801	78.801	78.301	78.401	78.201	78.401	78.501	78.501	78.801	79.001	78.801	78.701	78.801	78.301	78.201	78.301	78.201	78.201	78.101	78.201	78.201
KC706582_Tomato common mosaic virus isolate BR Pda32 05	79.601	79.601	79.101	78.901	78.901	78.901	78.601	78.901	78.901	78.601	78.601	78.701	78.801	78.601	78.601	78.701	78.101	78.101	78.101	78.101	78.101	78.001	78.101	78.201	78.601	78.701	78.901	78.401	78.801	78.801	78.201	78.301	78.101	78.301	78.401	78.401	78.801	79.001	78.801	78.601	78.701	78.201	78.201	78.201	78.101	78.101	78.101	78.201	78.101
KC706581_Tomato common mosaic virus isolate BR Pda31 05	79.601	79.601	79.101	78.901	78.901	78.901	78.601	78.901	78.901	78.601	78.601	78.701	78.801	78.601	78.601	78.701	78.101	78.101	78.101	78.101	78.101	78.001	78.101	78.201	78.601	78.701	78.901	78.401	78.801	78.801	78.201	78.301	78.101	78.301	78.401	78.401	78.801	79.001	78.801	78.601	78.701	78.201	78.201	78.201	78.101	78.101	78.101	78.201	78.101
KC706583_Tomato common mosaic virus isolate BR Pda40 05	79.601	79.501	79.101	78.901	78.901	78.801	78.601	78.801	78.801	78.601	78.501	78.601	78.801	78.501	78.501	78.601	78.101	78.101	78.101	78.001	78.001	78.001	78.101	78.101	78.601	78.701	78.901	78.401	78.701	78.701	78.201	78.301	78.101	78.301	78.401	78.401	78.701	78.901	78.701	78.601	78.701	78.201	78.101	78.201	78.101	78.101	78.101	78.101	78.101
KC706585_Tomato common mosaic virus isolate BR Pda48 05	79.701	79.601	79.201	78.901	79.001	78.901	78.701	78.901	78.901	78.601	78.601	78.701	78.801	78.601	78.601	78.701	78.101	78.101	78.101	78.101	78.101	78.001	78.101	78.201	78.601	78.701	78.901	78.401	78.801	78.801	78.201	78.301	78.101	78.301	78.401	78.401	78.801	79.001	78.801	78.601	78.701	78.201	78.201	78.201	78.101	78.101	78.101	78.201	78.101
KC706587_Tomato common mosaic virus isolate BR Pda55 05	79.701	79.601	79.201	79.001	79.001	79.001	78.701	79.001	78.901	78.701	78.601	78.801	78.901	78.601	78.701	78.701	78.201	78.201	78.201	78.101	78.101	78.101	78.201	78.301	78.701	78.801	79.001	78.501	78.901	78.901	78.301	78.401	78.201	78.401	78.501	78.501	78.801	79.101	78.801	78.701	78.801	78.301	78.301	78.301	78.201	78.201	78.201	78.301	78.201
KC706575_Tomato common mosaic virus isolate BR Coi21 07	79.601	79.601	79.101	78.901	78.901	78.901	78.601	78.901	78.901	78.601	78.601	78.701	78.801	78.401	78.601	78.701	78.101	78.001	78.001	78.001	78.001	78.001	78.101	78.101	78.601	78.601	78.801	78.301	78.701	78.701	78.201	78.201	78.001	78.301	78.301	78.401	78.701	78.901	78.701	78.501	78.601	78.101	78.101	78.101	78.101	78.101	78.001	78.101	78.101
KC706574_Tomato common mosaic virus isolate BR Coi20 07	79.701	79.601	79.201	78.901	79.001	78.901	78.701	78.901	78.901	78.601	78.601	78.701	78.901	78.501	78.601	78.701	78.101	78.101	78.101	78.001	78.001	78.001	78.101	78.101	78.601	78.701	78.901	78.401	78.701	78.701	78.201	78.301	78.101	78.301	78.401	78.401	78.701	78.901	78.701	78.601	78.701	78.201	78.101	78.201	78.101	78.101	78.101	78.101	78.101
KT203558_Tomato common mosaic virus isolate ToCmMV[BR Ca14 To 07]	79.801	79.701	79.201	79.001	79.001	79.001	78.801	79.001	79.001	78.701	78.701	78.801	79.001	78.601	78.801	78.901	78.301	78.201	78.201	78.201	78.201	78.201	78.301	78.301	78.801	78.801	79.001	78.501	78.901	78.901	78.401	78.401	78.201	78.501	78.501	78.601	78.901	79.101	78.901	78.701	78.801	78.301	78.301	78.301	78.301	78.301	78.201	78.301	78.301
NC 043526_Jacquemontia yellow vein virus isolate 1915	80.101	80.401	80.801	80.801	80.801	80.601	80.701	80.801	81.001	80.701	79.801	79.901	80.001	77.501	77.201	77.201	77.201	77.201	77.201	77.101	77.101	77.101	77.201	77.501	76.901	77.301	76.901	77.301	77.001	77.001	77.301	77.201	77.701	77.601	77.301	77.501	77.101	77.001	77.101	77.201	77.001	76.801	76.701	76.701	76.801	76.901	76.801	76.701	76.601
KY624376_Jacquemontia yellow vein virus isolate 1915	80.001	80.301	80.801	80.701	80.701	80.601	80.601	80.701	81.001	80.601	79.701	79.801	79.901	77.401	77.101	77.101	77.201	77.101	77.101	77.001	77.001	77.001	77.201	77.401	76.801	77.301	76.801	77.201	76.901	76.901	77.201	77.101	77.601	77.501	77.201	77.401	77.001	76.901	77.001	77.201	76.901	76.701	76.601	76.601	76.701	76.801	76.701	76.601	76.601
MK440292_Tomato twisted leaf virus isolate Be6.6H	81.801	81.801	82.201	81.701	82.201	82.101	82.301	82.001	82.401	81.501	81.701	81.401	81.701	80.701	80.701	80.701	80.701	80.601	80.601	80.501	80.501	80.401	80.701	80.301	80.701	80.301	80.201	79.901	80.601	80.601	80.401	80.601	80.301	80.301	80.501	80.301	80.501	80.301	80.201	80.401	80.401	80.601	80.501	80.601	80.401	80.401	80.401	80.501	80.501
[truncated: 200 more columns]
